# Supplementary material
Source: PubMed Central journal article supplement (PMC5645073)
Supplement: NIHMS911917-supplement-SI.pdf [file NIHMS911917-supplement-SI.pdf]

## *Supporting Information*

### **Chemical Synthesis of the Repeating Unit of Type V Group B *Streptococcus* Capsular Polysaccharide**

Jian Gao<sup>†</sup> and Zhongwu Guo<sup>‡,\*</sup>

<sup>†</sup> National Glycoengineering Research Center and Shandong Provincial Key Laboratory of Carbohydrate Chemistry and Glycobiology, Shandong University, 29 Shanda Nan Lu, Jinan 250010, China

<sup>‡</sup> Department of Chemistry, University of Florida, 214 Leigh Hall, Gainesville, Florida 32611, United States

\*Corresponding Author E-mail: zguo@chem.ufl.edu

#### **Table of Contents**

|                                                                              |               |
|------------------------------------------------------------------------------|---------------|
| <b>I. Experimental Section</b> -----                                         | Page S2 - S15 |
| <b>II. NMR and MS Spectra</b> -----                                          | Page S16-S57  |
| <sup>1</sup> H, <sup>13</sup> C, 2D NMR spectra of compound <b>14</b> -----  | Page S16-S19  |
| <sup>1</sup> H, <sup>13</sup> C, 2D NMR spectra of compound <b>15</b> -----  | Page S20-S23  |
| <sup>1</sup> H, <sup>13</sup> C, 2D NMR spectra of compound <b>16</b> -----  | Page S24-S26  |
| <sup>1</sup> H, <sup>13</sup> C, 2D NMR spectra of compound <b>17</b> -----  | Page S27-S30  |
| <sup>1</sup> H, <sup>13</sup> C, 2D NMR spectra of compound <b>8</b> -----   | Page S31-S34  |
| <sup>1</sup> H, <sup>13</sup> C, 2D NMR spectra of compound <b>4</b> -----   | Page S35-S38  |
| <sup>1</sup> H, <sup>13</sup> C NMR spectra of compound <b>6</b> -----       | Page S39-S40  |
| <sup>1</sup> H, <sup>13</sup> C, 2D NMR spectra of compound <b>S18</b> ----- | Page S41-S46  |
| <sup>1</sup> H, <sup>13</sup> C, 2D NMR spectra of compound <b>3</b> -----   | Page S47-S50  |
| <sup>1</sup> H, <sup>13</sup> C, 2D NMR spectra of compound <b>2</b> -----   | Page S51-S54  |
| HR ESI-TOF MS spectra of compound <b>2</b> -----                             | Page S55      |
| MALDI-TOF MS spectra of global deprotection intermediates -----              | Page S56-S57  |

## I. Experimental Section

**General Experimental Methods:** Chemicals and materials were purchased from commercial sources and were used as received without further purification unless otherwise noted. Molecular sieve 4 Å was flame-dried under vacuum and cooled to room temperature under a N<sub>2</sub> atmosphere immediately before use. TLC was carried out on Silica Gel 60 Å F254 plates with detection by a UV detector and/or by charring with 15% H<sub>2</sub>SO<sub>4</sub> in EtOH (w/v). Mass spectrometry was recorded on either a high resolution ESI-TOF or a normal resolution MALD-TOF machine. NMR spectra were recorded on a 600 or 700 MHz machine with chemical shifts reported in ppm ( $\delta$ ) downfield from internal tetramethylsilane (TMS) or DHO reference. Signals are described as s (singlet), d (doublet), t (triplet) or m (multiplet), and coupling constants are reported in Hz.

### *p*-Tolyl (2,3,4,6-tetra-*O*-benzoyl- $\beta$ -D-glucopyranosyl)-(1 $\rightarrow$ 3)-2-*O*-benzoyl-4,6-*O*-benzylidene-1-thio- $\beta$ -D-glucopyranoside (**14**):

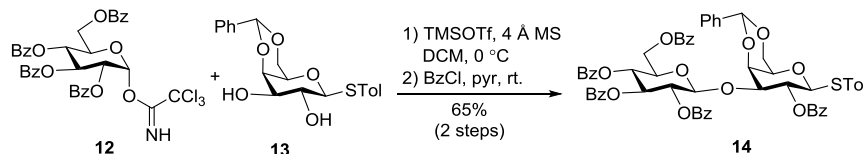

To a stirred mixture of **12** (200 mg, 0.271 mmol), **13** (84 mg, 0.226 mmol), and freshly activated MS 4 Å in anhydrous CH<sub>2</sub>Cl<sub>2</sub> (4 mL) was slowly added TMSOTf (4.9  $\mu$ L, 0.027 mmol) under a N<sub>2</sub> atmosphere at 0 °C. After the reaction mixture was stirred under this condition for another 15 min, it was neutralized with Et<sub>3</sub>N, filtered, and concentrated. The residue was subjected to flush silica gel column chromatography with EtOAc and hexanes (1:2) as the eluent to give a mixture of two regio-isomers (174 mg, 81% yield) as a foamy solid. This product was then dissolved in pyridine (4 mL), and to the solution was added BzCl (43  $\mu$ L, 0.366 mmol) at room temperature. After the reaction mixture was stirred for 4 h, it was concentrated under vacuum to give a residue that was purified by silica gel column chromatography with EtOAc and hexanes (1:3) as the eluent to give **14** (156 mg, 65% for two steps) as a foamy solid. <sup>1</sup>H NMR (600 MHz, CDCl<sub>3</sub>)  $\delta$ : 8.03 (d, *J* = 8.4 Hz, 2H, Ph), 7.88 (d, *J* = 8.4 Hz, 2H, Ph), 7.70 (dd, *J* = 9.3, 8.4 Hz, 4H, Ph), 7.58

(t,  $J = 7.8$  Hz, 1H, Ph), 7.49 – 7.42 (m, 6H, Ph), 7.39 – 7.23 (m, 13H, Ph), 7.19 (t,  $J = 7.5$  Hz, 2H, Ph), 7.04 (t,  $J = 7.5$  Hz, 2H, Ph), 6.98 (d,  $J = 7.8$  Hz, 2H, Ph), 5.76 (t,  $J = 9.6$  Hz, 1H, H-3<sup>Glc</sup>), 5.61 (t,  $J = 9.8$  Hz, 1H, H-4<sup>Glc</sup>), 5.46 (t,  $J = 8.7$  Hz, 1H, H-2<sup>Glc</sup>), 5.41 – 5.35 (m, 2H, H-2<sup>Gal</sup>, Ph-CH-), 5.09 (d,  $J = 7.8$  Hz, 1H, H-1<sup>Glc</sup>), 4.70 (d,  $J = 9.6$  Hz, 1H, H-1<sup>Gal</sup>), 4.66 (dd,  $J = 12.0$ , 2.4 Hz, 1H, H-6a<sup>Glc</sup>), 4.51 (dd,  $J = 12.0$ , 5.4 Hz, 1H, H-6b<sup>Glc</sup>), 4.38 (d,  $J = 3.0$  Hz, 1H, H-4<sup>Gal</sup>), 4.26 (d,  $J = 12.0$  Hz, 1H, H-6a<sup>Gal</sup>), 4.09 (m, 2H, H-5<sup>Glc</sup>, H-3<sup>Gal</sup>), 3.83 (d,  $J = 12.0$  Hz, 1H, H-6b<sup>Gal</sup>), 3.32 (s, 1H, H-5<sup>Gal</sup>), 2.28 (s, 3H, Ph-CH<sub>3</sub>). <sup>13</sup>C NMR (150 MHz, CDCl<sub>3</sub>)  $\delta$ : 165.99, 165.69, 165.12, 164.67, 164.45, 138.00, 137.64, 133.88, 133.59, 133.49, 133.44, 133.15, 132.71, 132.62, 130.14, 129.79, 129.72, 129.67, 129.62, 129.51, 129.45, 128.81, 128.76, 128.66, 128.60, 128.45, 128.42, 128.19, 127.98, 127.94, 127.77, 126.56, 101.93 (C-1<sup>Glc</sup>), 100.96 (Ph-CH-), 85.73 (C-1<sup>Gal</sup>), 79.95, 76.10, 72.87, 72.25, 71.82, 70.16, 69.37, 68.92, 68.76, 62.41, 21.21. HR ESI-TOF MS ( $m/z$ ): calcd for C<sub>61</sub>H<sub>52</sub>O<sub>15</sub>SNa [M + Na]<sup>+</sup>, 1079.2925; found, 1079.2880.

**2-Azidoethyl (2,3,4,6-tetra-*O*-benzoyl- $\beta$ -D-glucopyranosyl)-(1 $\rightarrow$ 3)-(2-*O*-benzoyl-4,6-*O*-benzylidene- $\beta$ -D-galactopyranosyl)-(1 $\rightarrow$ 4)-2,3,6-tri-*O*-benzyl- $\beta$ -D-glucopyranoside (**15**):**

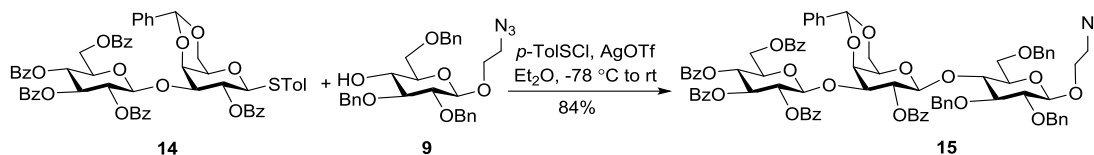

After a mixture of **14** (110 mg, 0.104 mmol), **9** (49 mg, 0.095 mmol), and freshly activated MS 4 Å in anhydrous diethyl ether (4 mL) was stirred at room temperature for 40 min, it was cooled to  $-78$  °C. Then, a solution of AgOTf (80 mg, 0.312 mmol) in diethyl ether (1.0 mL) was added. Fifteen minutes later, *p*-TolSCL (17  $\mu$ L, 0.114 mmol) was added through a microsyringe. The reaction mixture was allowed to warm up slowly to room temperature within 1 h and stirred for another 20 min. The reaction was quenched with Et<sub>3</sub>N, and the mixture was diluted with CH<sub>2</sub>Cl<sub>2</sub> and filtered. The filtrate was concentrated under vacuum, and the residue was purified by silica gel column chromatography with EtOAc and hexanes (1:2) as the eluent to give **15** (116 mg, 84%) as a foamy solid. <sup>1</sup>H NMR (600 MHz, CDCl<sub>3</sub>)  $\delta$ : 8.01 (d,  $J = 8.4$  Hz, 2H, Ph), 7.89 (d,  $J = 8.4$  Hz, 2H, Ph), 7.70 (d,  $J = 8.4$  Hz, 2H, Ph), 7.60 (d,  $J = 7.8$  Hz, 2H, Ph), 7.54 (t,  $J = 7.2$  Hz,

1H, Ph), 7.51 – 7.47 (m, 3H, Ph), 7.46 – 7.16 (m, 31H, Ph), 7.04 (t,  $J = 7.8$  Hz, 2H, Ph), 5.81 (t,  $J = 9.6$  Hz, 1H, H-3<sup>Glc-A</sup>), 5.65 (t,  $J = 9.6$  Hz, 1H, H-4<sup>Glc-A</sup>), 5.47 (t,  $J = 9.6$  Hz, 2H, H-2<sup>Glc-A</sup>, H-2<sup>Gal</sup>), 5.38 (s, 1H, Ph-CH-), 5.09 (d,  $J = 11.4$  Hz, 1H, Bn), 5.08 (d,  $J = 7.8$  Hz, 1H, H-1<sup>Glc-A</sup>), 4.84 (d,  $J = 10.8$  Hz, 1H, Bn), 4.76 – 4.66 (m, 3H, H-6a<sup>Glc-A</sup>, 2 × Bn), 4.63 (d,  $J = 7.8$  Hz, 1H, H-1<sup>Gal</sup>), 4.53 – 4.47 (m, 2H, H-6b<sup>Glc-A</sup>, Bn), 4.27 – 4.10 (m, 2H, H-4<sup>Gal</sup>, H-1<sup>Glc-B</sup>), 4.18 (d,  $J = 12.0$  Hz, 1H, Bn), 4.17 – 4.11 (m, 2H, H-5<sup>Glc-A</sup>, H-6a<sup>Gal</sup>), 3.92 – 3.87 (m, 1H, -OCH<sub>2</sub>CH<sub>2</sub>-), 3.85 (t,  $J = 9.3$  Hz, 1H, H-4<sup>Glc-B</sup>), 3.76 (dd,  $J = 10.2, 3.0$  Hz, 1H, H-3<sup>Gal</sup>), 3.72 (d,  $J = 12.0$  Hz, 1H, H-6b<sup>Gal</sup>), 3.59 – 3.53 (m, 2H, -OCH<sub>2</sub>CH<sub>2</sub>-, H-3<sup>Glc-B</sup>), 3.46 (dd,  $J = 11.0, 4.0$  Hz, 1H, H-6a<sup>Glc-B</sup>), 3.42 – 3.29 (m, 4H, H-6b<sup>Glc-B</sup>, H-2<sup>Glc-B</sup>, -CH<sub>2</sub>CH<sub>2</sub>-N<sub>3</sub>), 3.11 – 3.05 (m, 1H, H-5<sup>Glc-B</sup>), 3.03 (s, 1H, H-5<sup>Gal</sup>). <sup>13</sup>C NMR (150 MHz, CDCl<sub>3</sub>)  $\delta$ : 165.99, 165.74, 165.09, 164.67, 164.17, 138.95, 138.54, 138.40, 137.73, 133.50, 133.40, 133.19, 132.77, 132.60, 129.80, 129.70, 129.63, 129.41, 129.35, 129.31, 128.84, 128.69, 128.62, 128.59, 128.55, 128.42, 128.35, 128.27, 128.21, 128.07, 127.96, 127.87, 127.70, 127.45, 127.14, 126.38, 103.39 (C-1<sup>Glc-B</sup>), 101.76 (C-1<sup>Glc-A</sup>), 101.00 (C-1<sup>Gal</sup>), 100.82 (Ph-CH-), 82.89, 81.71, 78.68, 77.12, 76.00, 75.65, 74.85, 74.36, 73.25, 72.72, 72.20, 71.85, 70.73, 69.37, 68.44, 68.04, 67.94, 66.65, 62.40, 50.86. HR ESI-TOF MS ( $m/z$ ): calcd for C<sub>83</sub>H<sub>77</sub>N<sub>3</sub>O<sub>21</sub>Na [M + Na]<sup>+</sup>, 1474.4947; found, 1474.4946.

**2-Azidoethyl (2,3,4,6-tetra-*O*-benzoyl- $\beta$ -D-glucopyranosyl)-(1 $\rightarrow$ 3)-(2-*O*-benzoyl-6-*O*-benzyl- $\beta$ -D-galactopyranosyl)-(1 $\rightarrow$ 4)-2,3,6-tri-*O*-benzyl- $\beta$ -D-glucopyranoside (**16**):**

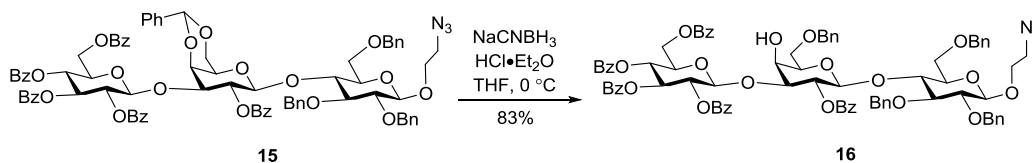

To a stirred mixture of **15** (90 mg, 0.062 mmol), sodium cyanoborohydride (58 mg, 0.930 mmol), and MS 4 Å in THF was added HCl·Et<sub>2</sub>O (1 M) slowly at 0 °C until pH reached 2-3. Three hours later, the reaction was quenched with aq. NaHCO<sub>3</sub>. The solid materials were filtered off and washed with CH<sub>2</sub>Cl<sub>2</sub>. The organic phases were combined, dried with Na<sub>2</sub>SO<sub>4</sub>, and concentrated under vacuum. The residue was purified by silica gel column chromatography with EtOAc and hexanes (1:2) as the eluent to produce **16** (75 mg, 83%) as a foamy solid. <sup>1</sup>H NMR (600 MHz,

CDCl<sub>3</sub>)  $\delta$ : 8.03 (d,  $J = 7.8$  Hz, 2H, Ph), 7.89 (d,  $J = 8.4$  Hz, 2H, Ph), 7.70 (d,  $J = 8.4$  Hz, 2H, Ph), 7.55 – 7.47 (m, 4H, Ph), 7.45 (d,  $J = 7.8$  Hz, 2H, Ph), 7.43 – 7.19 (m, 29H, Ph), 7.16 (t,  $J = 7.5$  Hz, 2H, Ph), 7.09 (t,  $J = 7.5$  Hz, 2H, Ph), 5.81 (t,  $J = 9.8$  Hz, 1H, H-3<sup>Glc-A</sup>), 5.60 (t,  $J = 9.6$  Hz, 1H, H-4<sup>Glc-A</sup>), 5.48 (t,  $J = 8.4$  Hz, 1H, H-2<sup>Glc-A</sup>), 5.43 (t,  $J = 8.4$  Hz, 1H, H-2<sup>Gal</sup>), 4.98 (d,  $J = 10.8$  Hz, 1H, Bn), 4.93 (d,  $J = 7.8$  Hz, 1H, H-1<sup>Glc-A</sup>), 4.83 (d,  $J = 11.4$  Hz, 1H, Bn), 4.73 – 4.67 (m, 3H, H-6a<sup>Glc-A</sup>, Bn), 4.62 (d,  $J = 8.4$  Hz, 1H, H-1<sup>Gal</sup>), 4.51 (d,  $J = 12.0$  Hz, 1H, Bn), 4.45 (dd,  $J = 12.0$ , 6.0 Hz, 1H, H-6b<sup>Glc-A</sup>), 4.42 (d,  $J = 12.0$  Hz, 1H, Bn), 4.29 (d,  $J = 12.0$  Hz, 1H, Bn), 4.25 – 4.18 (m, 4H, Bn, H-1<sup>Glc-B</sup>, H-5<sup>Glc-A</sup>, H-4<sup>Gal</sup>), 3.92 – 3.88 (m, 1H, -OCH<sub>2</sub>CH<sub>2</sub>-), 3.85 (t,  $J = 9.3$  Hz, 1H, H-4<sup>Glc-B</sup>), 3.70 (dd,  $J = 9.6$ , 3.0 Hz, 1H, H-3<sup>Gal</sup>), 3.65 – 3.61 (m, 1H, H-6a<sup>Gal</sup>), 3.59 – 3.55 (m, 1H, -OCH<sub>2</sub>CH<sub>2</sub>-), 3.53 – 3.48 (m, 3H, H-3<sup>Glc-B</sup>, H-5<sup>Gal</sup>, H-6b<sup>Gal</sup>), 3.46 – 3.29 (m, 5H, H-6a,6b<sup>Glc-B</sup>, H-2<sup>Glc-B</sup>, -CH<sub>2</sub>CH<sub>2</sub>N<sub>3</sub>), 3.09 (dd,  $J = 10.2$ , 2.4 Hz, 1H, H-5<sup>Glc-B</sup>), 2.88 (s, 1H, -OH). <sup>13</sup>C NMR (150 MHz, CDCl<sub>3</sub>)  $\delta$ : 166.10, 165.69, 165.11, 164.59, 164.33, 139.03, 138.54, 138.29, 138.21, 133.56, 133.39, 133.27, 132.73, 129.82, 129.80, 129.61, 129.49, 129.34, 129.26, 129.17, 128.57, 128.52, 128.44, 128.36, 128.31, 128.24, 128.21, 128.10, 128.04, 127.96, 127.90, 127.68, 127.65, 127.53, 127.49, 127.19, 103.41 (C-1<sup>Glc-B</sup>), 101.51 (C-1<sup>Glc-A</sup>), 100.16 (C-1<sup>Gal</sup>), 82.59, 81.69, 81.54, 76.12, 75.38, 74.88, 74.34, 73.50, 73.38, 73.32, 72.47, 71.59, 71.15, 70.60, 69.39, 68.62, 68.20, 68.03, 67.85, 62.77, 50.88, 26.50. HR ESI-TOF MS ( $m/z$ ): calcd for C<sub>83</sub>H<sub>79</sub>N<sub>3</sub>O<sub>21</sub>Na [M + Na]<sup>+</sup>, 1476.5104; found, 1476.5099.

**2-Azidoethyl (2,3,4,6-tetra-*O*-benzoyl- $\beta$ -D-glucopyranosyl)-(1 $\rightarrow$ 3)-[(2,3,4-tri-*O*-benzyl-6-*O*-*tert*-butyldimethylsilyl- $\alpha$ -D-glucopyranosyl)-(1 $\rightarrow$ 4)]-(2-*O*-benzoyl-6-*O*-benzyl- $\beta$ -D-glucopyranosyl)-(1 $\rightarrow$ 4)-2,3,6-tri-*O*-benzyl- $\beta$ -D-glucopyranoside (**17**):**

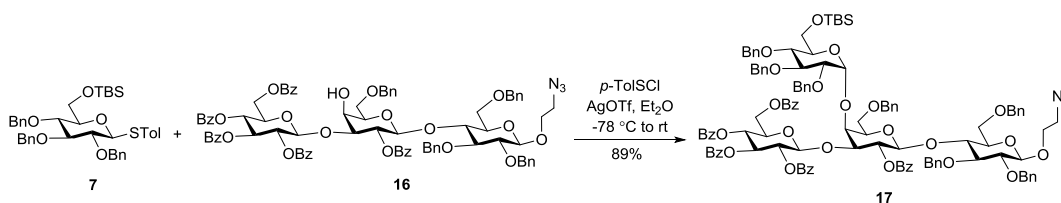

After a mixture of **7** (25.0 mg, 0.037 mmol), **17** (49.3 mg, 0.034 mmol), and freshly activated MS 4 Å in anhydrous diethyl ether (5 mL) was stirred at room temperature for 40 min, it was cooled

to  $-78\text{ }^{\circ}\text{C}$ . Then, a solution of AgOTf (9.5 mg, 0.037 mmol) in diethyl ether (0.5 mL) was added. Fifteen minutes later, *p*-TolSCl (5.3  $\mu\text{L}$ , 0.037 mmol) was added through a microsyringe. The reaction mixture was allowed to warm up slowly to room temperature within 1 h and stirred for another 20 min. The reaction was quenched with  $\text{Et}_3\text{N}$ , and the mixture was diluted with  $\text{CH}_2\text{Cl}_2$  and filtered. The filtrate was concentrated under vacuum, and the residue was purified by silica gel column chromatography with EtOAc and hexanes (1:3) as the eluent to give **17** (60.5 mg, 89%) as a foamy solid.  $^1\text{H}$  NMR (600 MHz,  $\text{CDCl}_3$ )  $\delta$ : 8.01 – 7.98 (d,  $J = 8.4$  Hz, 2H, Ph), 7.91 (d,  $J = 8.4$  Hz, 2H, Ph), 7.68 (d,  $J = 8.4$  Hz, 2H, Ph), 7.52 – 7.45 (m, 4H, Ph), 7.41 – 7.17 (m, 40H, Ph), 7.17 – 7.04 (m, 8H, Ph), 6.96 (t,  $J = 8.0$  Hz, 2H, Ph), 5.89 (t,  $J = 9.6$  Hz, 1H, H-3<sup>Glc-A</sup>), 5.61 (t,  $J = 9.8$  Hz, 1H, H-4<sup>Glc-A</sup>), 5.44 (dd,  $J = 9.6, 7.8$  Hz, 1H, H-2<sup>Glc-A</sup>), 5.33 (dd,  $J = 10.2, 7.8$  Hz, 1H, H-2<sup>Gal</sup>), 5.19 (d,  $J = 3.0$  Hz, 1H, H-1<sup>Glc-C</sup>), 5.10 (d,  $J = 11.4$  Hz, 1H, Bn), 5.08 (d,  $J = 7.8$  Hz, 1H, H-1<sup>Glc-A</sup>), 4.90 (d,  $J = 11.4$  Hz, 1H, Bn), 4.85 (d,  $J = 11.4$  Hz, 1H, Bn), 4.78 (d,  $J = 10.8$  Hz, 1H, Bn), 4.72 (d,  $J = 11.4$  Hz, 1H, Bn), 4.70 (d,  $J = 8.4$  Hz, 1H, H-1<sup>Gal</sup>), 4.67 (dd,  $J = 12.6, 3.0$  Hz, 1H, H-6a<sup>Glc-A</sup>), 4.65 – 4.58 (m, 3H, Bn), 4.56 (d,  $J = 10.8$  Hz, 2H, Bn), 4.54 (dd,  $J = 12.6, 6.0$  Hz, 1H, H-6b<sup>Glc-A</sup>), 4.46 (d,  $J = 12.6$  Hz, 1H, Bn), 4.31 (d,  $J = 2.4$  Hz, 1H, H-4<sup>Gal</sup>), 4.26 (m, 2H, H-6a<sup>Glc-C</sup>, 6b<sup>Glc-C</sup>), 4.22 (d,  $J = 7.8$  Hz, 1H, H-1<sup>Glc-B</sup>), 4.21 – 4.16 (m, 3H, Bn, H-5<sup>Glc-A</sup>), 4.13 (d,  $J = 9.6$  Hz, 1H, H-5<sup>Glc-C</sup>), 4.01 – 4.04 (m, 2H, Bn, H-3<sup>Glc-C</sup>), 3.92 – 3.80 (m, 4H, H-4<sup>Glc-C</sup>, H-4<sup>Glc-B</sup>, H-6a<sup>Gal</sup>, -OCH<sub>2</sub>CH<sub>2</sub>-), 3.72 (dd,  $J = 10.2, 6.6$  Hz, 1H, H-6b<sup>Gal</sup>), 3.67 (d,  $J = 10.2$  Hz, 1H, H-3<sup>Gal</sup>), 3.58 – 3.52 (m, 3H, H-5<sup>Gal</sup>, H-3<sup>Glc-B</sup>, -OCH<sub>2</sub>CH<sub>2</sub>-), 3.44 (dd,  $J = 9.6, 3.0$  Hz, 1H, H-2<sup>Glc-C</sup>), 3.41 – 3.28 (m, 5H, H-6a,6b<sup>Glc-B</sup>, H-2<sup>Glc-B</sup>, -CH<sub>2</sub>CH<sub>2</sub>N<sub>3</sub>), 3.13 – 3.08 (m, 1H, H-5<sup>Glc-B</sup>), 0.97 (s, 9H, -*t*Bu), 0.21 (s, 3H, -SiCH<sub>3</sub>), 0.19 (s, 3H, -SiCH<sub>3</sub>).  $^{13}\text{C}$  NMR (150 MHz,  $\text{CDCl}_3$ )  $\delta$ : 165.96, 165.66, 165.16, 164.22, 163.98, 139.38, 139.36, 138.99, 138.62, 138.58, 138.52, 138.38, 133.50, 133.45, 133.17, 132.52, 132.27, 129.84, 129.64, 129.62, 129.29, 129.20, 128.86, 128.69, 128.64, 128.42, 128.33, 128.25, 128.22, 128.18, 128.16, 128.14, 128.12, 128.05, 128.03, 127.92, 127.89, 127.79, 127.70, 127.61, 127.58, 127.43, 127.39, 127.33, 127.28, 127.11, 126.92, 103.28 (C-1<sup>Glc-B</sup>), 102.97 (C-1<sup>Glc-A</sup>), 100.73 (C-1<sup>Gal</sup>), 100.22 (C-1<sup>Glc-C</sup>), 82.26, 81.81, 81.69, 81.66, 81.53, 79.44, 77.68, 76.89, 75.51, 74.93, 74.79, 74.74, 74.50, 74.22, 73.47, 73.17, 72.94, 72.84, 72.40,

72.33, 72.24, 71.51, 69.66, 69.60, 68.03, 67.98, 62.98, 62.06, 50.88, 26.17, 18.48, -4.67, -5.08.  
 HR ESI-TOF MS (m/z): calcd for C<sub>116</sub>H<sub>121</sub>N<sub>3</sub>O<sub>26</sub>SiNa [M + Na]<sup>+</sup>, 2022.7905; found, 2022.7841.

***p*-Tolyl (2,3,4,6-tetra-*O*-benzoyl-β-D-glucopyranosyl)-(1→3)-2-*O*-benzoyl-6-*O*-benzyl-1-thio-β-D-glucopyranoside (**8**):**

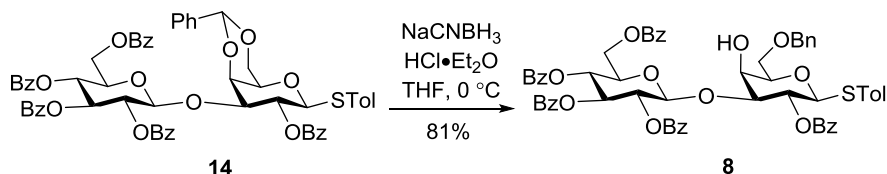

To a stirred mixture of **14** (220 mg, 0.208 mmol), sodium cyanoborohydride (196 mg, 3.125 mmol), and MS 4 Å in THF was added HCl·Et<sub>2</sub>O (1 M) slowly at 0 °C until pH reached 2-3. Three hours later, the reaction was quenched with aq. NaHCO<sub>3</sub>, and the solid materials were filtered off and washed with CH<sub>2</sub>Cl<sub>2</sub>. The combined organic phase was dried and concentrated, and the residue was purified by column chromatography with EtOAc and hexanes (1:2) as the eluent to obtain **8** (179 mg, 81%) as a foamy solid. <sup>1</sup>H NMR (600 MHz, CDCl<sub>3</sub>) δ: 8.03 (d, *J* = 7.2 Hz, 2H, Ph), 7.88 (d, *J* = 7.2 Hz, 2H, Ph), 7.70 (d, *J* = 7.2 Hz, 2H, Ph), 7.66 (d, *J* = 7.2 Hz, 2H, Ph), 7.54 (t, *J* = 7.5 Hz, 1H, Ph), 7.48 – 7.26 (m, 17H, Ph), 7.22 – 7.17 (m, 4H, Ph), 7.08 (t, *J* = 7.5 Hz, 2H, Ph), 6.96 (d, *J* = 7.8 Hz, 2H, Ph), 5.79 (t, *J* = 9.6 Hz, 1H, H-3<sup>Glc</sup>), 5.57 (t, *J* = 9.6 Hz, 1H, H-4<sup>Glc</sup>), 5.49 (t, *J* = 9.6 Hz, 1H, H-2<sup>Glc</sup>), 5.46 (t, *J* = 9.6 Hz, 1H, H-2<sup>Gal</sup>), 5.00 (d, *J* = 7.8 Hz, 1H, H-1<sup>Glc</sup>), 4.69 – 4.65 (m, 2H, H-6a<sup>Glc</sup>, H-1<sup>Gal</sup>), 4.53 – 4.47 (m, 2H, Ph-CH<sub>2</sub>), 4.44 (dd, *J* = 12.0, 6.0 Hz, 1H, H-6b<sup>Glc</sup>), 4.22 (s, 1H, H-4<sup>Gal</sup>), 4.17 – 4.12 (m, 1H, H-5<sup>Glc</sup>), 3.94 (dd, *J* = 9.6, 3.0 Hz, 1H, H-3<sup>Gal</sup>), 3.78 (dd, *J* = 9.6, 3.0 Hz, 1H, H-6a<sup>Gal</sup>), 3.71 – 3.63 (m, 2H, H-6b<sup>Gal</sup>, H-5<sup>Gal</sup>), 2.85 (s, 1H, -OH), 2.25 (s, 3H, Ph-CH<sub>3</sub>). <sup>13</sup>C NMR (150 MHz, CDCl<sub>3</sub>) δ: 166.05, 165.65, 165.11, 164.68, 164.63, 138.20, 137.70, 133.55, 133.39, 133.24, 132.74, 132.71, 132.60, 129.82, 129.78, 129.62, 129.53, 129.50, 129.47, 129.44, 129.30, 128.58, 128.53, 128.43, 128.36, 128.24, 128.14, 128.03, 127.69, 127.62, 101.40 (C-1<sup>Glc</sup>), 87.08 (C-1<sup>Gal</sup>), 82.32, 77.67, 73.56, 72.51, 72.49, 71.59, 69.72, 69.38, 69.14, 68.85, 62.73, 21.09. HR ESI-TOF MS (m/z): calcd for C<sub>61</sub>H<sub>54</sub>O<sub>15</sub>SNa [M + Na]<sup>+</sup>, 1081.3081; found, 1081.3073.

### Preactivation-based one-pot synthesis of **17**:

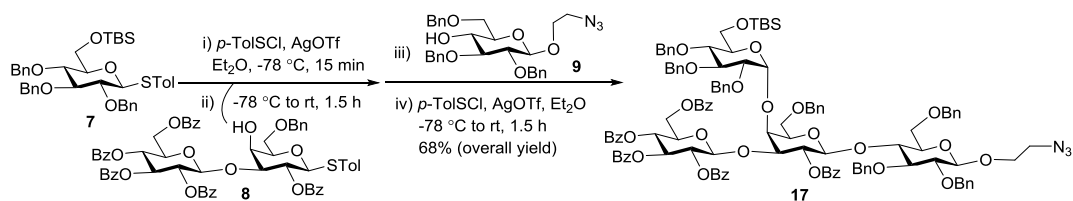

After the mixture of **7** (100 mg, 0.149 mmol) and freshly activated MS 4 Å in anhydrous diethyl ether (20 mL) was stirred at room temperature for 40 min and then cooled to -78 °C, a solution of AgOTf (38 mg, 0.149 mmol) in diethyl ether (1 mL) was added. The mixture was stirred for 10 min, and *p*-TolSCl (22 μL, 0.149 mmol) was added through a microsyringe. Fifteen minutes later, a solution of **8** (143 mg, 0.135 mmol) in anhydrous diethyl ether (2 mL) was added. The reaction was allowed to warm up slowly to room temperature in 1 h, and stirred for another 20 min, before it was cooled to -78 °C. Then, **9** (64 mg, 0.123 mmol) in anhydrous diethyl ether (1 mL), AgOTf (95 mg, 0.369 mmol) in diethyl ether (1 mL), and *p*-TolSCl (18 μL, 0.123 mmol) were added sequentially. The reaction was allowed to warm up slowly to room temperature in 1 h and stirred for another 20 min before it was quenched with Et<sub>3</sub>N, diluted with diethyl ether, and then filtered. The filtrate was concentrated under vacuum, and the residue was purified by silica gel column chromatography with EtOAc and hexanes (1:3) as the eluent to produce **17** (167 mg, 68% overall yield for two steps) as a foamy solid. Its spectrometric data were identical to those described above.

### 2-Azidoethyl (2,3,4,6-tetra-*O*-benzoyl-β-D-glucopyranosyl)-(1→3)-[(2,3,4-tri-*O*-benzyl-α-D-glucopyranosyl)-(1→4)]-2-*O*-benzoyl-6-*O*-benzyl-β-D-glucopyranosyl-(1→4)-2,3,6-tri-*O*-benzyl-β-D-glucopyranoside (**4**):

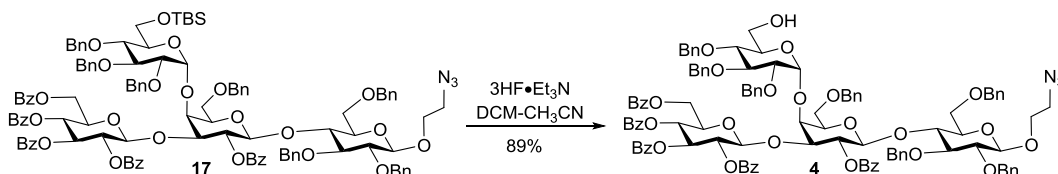

To the solution of **17** (140 mg, 0.070 mmol) in CH<sub>2</sub>Cl<sub>2</sub> and CH<sub>3</sub>CN (V/V, 1:1, 3 mL) was added trimethylamine trihydrofluoride (1 mL). The mixture was stirred at room temperature overnight, and quenched with saturated aq. NaHCO<sub>3</sub> solution. The water phase was extracted with CH<sub>2</sub>Cl<sub>2</sub>



(3 × 40 mL), and the organic layers were combined, dried, and concentrated under vacuum. The residue was purified by silica gel column chromatography with EtOAc and hexanes (1:3) as the eluent to give **4** (117 mg, 89%) as syrup. <sup>1</sup>H NMR (600 MHz, CDCl<sub>3</sub>) δ: 7.92 (d, *J* = 8.4 Hz, 2H, Ph), 7.90 (d, *J* = 7.8 Hz, 2H, Ph), 7.70 (d, *J* = 8.4 Hz, 2H, Ph), 7.52 – 7.47 (m, 3H, Ph), 7.45 – 7.41 (m, 1H, Ph), 7.37 – 7.33 (m, 4H, Ph), 7.32 – 7.23 (m, 25H, Ph), 7.22 – 7.16 (m, 16H, Ph), 7.11 (t, *J* = 7.8 Hz, 2H, Ph), 7.08 – 7.04 (m, 3H, Ph), 5.81 (t, *J* = 9.6 Hz, 1H, H-3<sup>Glc-A</sup>), 5.62 – 5.56 (m, 2H, H-2,4<sup>Glc-A</sup>), 5.37 (d, *J* = 3.6 Hz, 1H, H-1<sup>Glc-C</sup>), 5.29 (dd, *J* = 10.2, 7.8 Hz, 1H, H-2<sup>Gal</sup>), 5.13 (d, *J* = 11.4 Hz, 1H, Bn), 4.84 (d, *J* = 11.4 Hz, 1H, Bn), 4.81 (d, *J* = 7.8 Hz, 1H, H-1<sup>Glc-A</sup>), 4.77 (d, *J* = 11.4 Hz, 1H, Bn), 4.73 – 4.57 (m, 9H, H-1<sup>Gal</sup>, H-6a<sup>Glc-A</sup>, Bn), 4.54 (dd, *J* = 12.0, 6.6 Hz, 1H, H-6b<sup>Glc-A</sup>), 4.43 (d, *J* = 12.0 Hz, 1H, Bn), 4.27 (d, *J* = 12.0 Hz, 1H, Bn), 4.22 – 4.19 (m, 2H, H-1<sup>Glc-B</sup>, H-4<sup>Gal</sup>), 4.19 – 4.15 (m, 1H, H-5<sup>Glc-A</sup>), 4.14 – 4.11 (m, 2H, Bn), 4.00 (dt, *J* = 9.6, 3.6 Hz, 1H, H-5<sup>Glc-C</sup>), 3.96 (d, *J* = 12.0 Hz, 1H, H-6a<sup>Glc-C</sup>), 3.89 – 3.85 (m, 2H, H-3<sup>Glc-C</sup>, -OCH<sub>2</sub>CH<sub>2</sub>-), 3.83 – 3.75 (m, 3H, H-4<sup>Glc-B</sup>, H-6b<sup>Glc-C</sup>, H-6a<sup>Gal</sup>), 3.68 – 3.62 (m, 2H, H-6b<sup>Gal</sup>, H-3<sup>Gal</sup>), 3.59 – 3.49 (m, 5H, H-2<sup>Glc-C</sup>, H-3<sup>Glc-B</sup>, H-4<sup>Glc-C</sup>, H-5<sup>Gal</sup>, -OCH<sub>2</sub>CH<sub>2</sub>-), 3.40 – 3.27 (m, 5H, H-2<sup>Glc-B</sup>, H-6a,6b<sup>Glc-B</sup>, -CH<sub>2</sub>CH<sub>2</sub>N<sub>3</sub>), 3.13 (s, 1H, -OH), 3.08 (d, *J* = 9.6 Hz, 1H, H-5<sup>Glc-B</sup>). <sup>13</sup>C NMR (150 MHz, CDCl<sub>3</sub>) δ: 165.88, 165.76, 165.39, 165.20, 163.92, 139.61, 138.92, 138.67, 138.52, 138.46, 138.41, 138.35, 133.59, 133.47, 133.32, 132.67, 132.58, 129.83, 129.60, 129.54, 129.24, 129.14, 129.08, 128.67, 128.62, 128.52, 128.46, 128.39, 128.31, 128.23, 128.19, 128.18, 128.14, 128.10, 127.97, 127.95, 127.90, 127.77, 127.59, 127.55, 127.43, 127.39, 127.32, 126.74, 103.29 (C-1<sup>Glc-B</sup>), 102.51 (C-1<sup>Glc-A</sup>), 100.46 (C-1<sup>Gal</sup>), 98.74 (C-1<sup>Glc-C</sup>), 82.73, 82.13, 81.62, 81.15, 80.80, 78.71, 78.15, 75.55, 74.84, 74.81, 74.80, 74.66, 74.15, 73.26, 73.20, 72.60, 72.48, 72.29, 71.47, 71.36, 70.11, 69.70, 68.00, 67.89, 63.07, 61.51, 50.87. HR ESI-TOF MS (*m/z*): calcd for C<sub>110</sub>H<sub>107</sub>N<sub>3</sub>O<sub>26</sub>Na [M + Na]<sup>+</sup>, 1908.7041; found, 1908.7002.

***p*-Tolyl (methyl 5-acetamido-7,8,9-tri-*O*-acetyl-3,5-dideoxy-*D*-glycero- $\alpha$ -*D*-galacto-non-2-ulopyranosylonate)-(2→3)-2-*O*-benzoyl-4,6-*O*-benzylidene-1-thio- $\beta$ -*D*-galactopyranoside (**6**):**

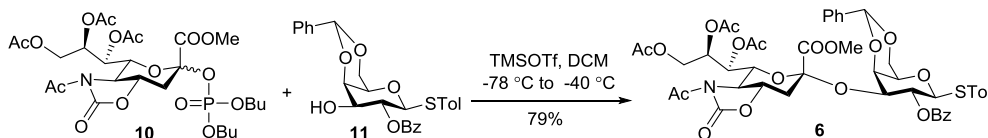

The mixture of **10** (190 mg, 0.285 mmol), **11** (91 mg, 0.190 mmol), and freshly activated MS 4 Å in anhydrous CH<sub>2</sub>Cl<sub>2</sub> (5 mL) was stirred under a N<sub>2</sub> atmosphere at room temperature for 3 h and then cooled to -78 °C. TMSOTf (51 μL, 0.285 mmol) was added dropwise using a microsyringe. The reaction mixture was allowed to warm up slowly to -40 °C in 1 h, stirred under the condition for another 20 min, quenched with Et<sub>3</sub>N (53 μL, 0.38 mmol), and then filtered. The filtrate was concentrated under vacuum, and the residue was purified by silica gel column chromatography with EtOAc and toluene (1:3) as the eluent to give **6** (140 mg, 79%) as syrup <sup>1</sup>H NMR (600 MHz, CDCl<sub>3</sub>) δ: 8.14 – 8.11 (d, *J* = 7.4 Hz, 2H), 7.58 (t, *J* = 7.4 Hz, 1H), 7.47 – 7.44 (m, 4H), 7.40 – 7.32 (m, 5H), 7.03 (d, *J* = 8.4 Hz, 2H), 5.55 – 5.49 (m, 2H), 5.34 (t, *J* = 9.6 Hz, 1H), 5.32 (s, 1H), 4.91 (d, *J* = 9.6 Hz, 1H), 4.57 (dd, *J* = 9.6, 3.4 Hz, 1H), 4.46 – 4.41 (m, 2H), 4.34 (d, *J* = 12.0 Hz, 1H), 4.12 (d, *J* = 12.0 Hz, 1H), 4.07 (d, *J* = 3.6 Hz, 1H), 4.01 – 3.94 (m, 1H), 3.73 – 3.66 (m, 2H), 3.49 (dd, *J* = 10.8, 9.6 Hz, 1H), 3.43 (s, 3H), 2.88 (dd, *J* = 12.0, 3.0 Hz, 1H), 2.41 (s, 3H), 2.31 (s, 3H), 2.17 (s, 3H), 2.02 (s, 3H), 1.78 (s, 3H), 1.72 (t, *J* = 12.6 Hz, 1H). <sup>13</sup>C NMR (150 MHz, CDCl<sub>3</sub>) δ: 171.94, 170.90, 170.41, 170.08, 168.66, 164.85, 153.38, 138.15, 137.76, 134.53, 133.09, 130.41, 129.90, 129.40, 129.04, 129.01, 128.93, 128.56, 128.55, 128.43, 128.20, 128.05, 127.18, 126.63, 125.27, 100.87, 96.73, 85.00, 74.92, 74.87, 73.81, 72.86, 71.41, 69.41, 69.19, 68.23, 67.96, 63.73, 58.77, 52.82, 37.00, 24.61, 21.38, 21.26, 20.84, 20.54. (These data agree well with that reported in the literature: C. Hsu, K. Chu, Y. Lin, J. Han, Y. Peng, C. Ren, C. Wu, and C.H. Wong, *Chem. Eur. J.* **2010**, 16, 1754-1760)

***p*-Tolyl (methyl 5-acetamido-7,8,9-tri-*O*-acetyl-3,5-dideoxy-*D*-glycero- $\alpha$ -*D*-galactono-2-ulopyranosylate)-(2→3)-(2-*O*-benzoyl-4,6-*O*-benzylidene- $\beta$ -*D*-galactopyranosyl)-(1→4)-6-*O*-benzyl-2-deoxy-2-phthalimido-1-thio- $\beta$ -*D*-glucopyranoside (**S18**):**

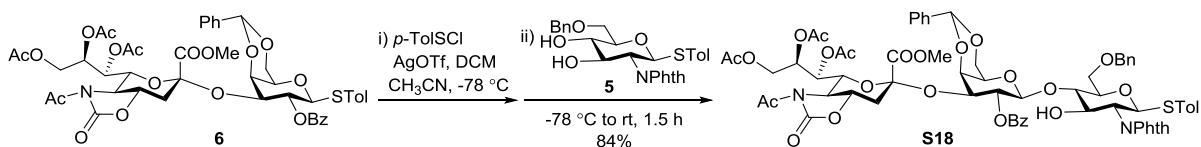

A mixture of **6** (30.0 mg, 0.032 mmol) and freshly activated MS 4 Å in anhydrous CH<sub>2</sub>Cl<sub>2</sub> (3 mL) was stirred at room temperature for 40 min and then cooled to -78 °C. A solution of AgOTf (24.7

mg, 0.096 mmol) in acetonitrile (0.5 mL) was added. After 10 min of stirring, *p*-TolSCl (4.6  $\mu$ L, 0.032 mmol) was added through a microsyringe. Fifteen minutes later, a solution of **5** (14.7 mg, 0.029 mmol) in anhydrous CH<sub>2</sub>Cl<sub>2</sub> (0.5 mL) was added. The reaction mixture was allowed to warm up slowly to room temperature in 1 h and stirred for another 20 min. The reaction was then quenched with Et<sub>3</sub>N, diluted with CH<sub>2</sub>Cl<sub>2</sub>, and filtered. The filtrate was concentrated in vacuum, and the residue was purified by silica gel column chromatography with EtOAc and toluene (1:3) as the eluent to give **S18** (32.1 mg, 84%) as syrup. <sup>1</sup>H NMR (600 MHz, CDCl<sub>3</sub>)  $\delta$ : 8.13 (d, *J* = 7.8 Hz, 2H, Ph), 7.88 – 7.67 (m, 4H, Ph), 7.60 (t, *J* = 6.9 Hz, 1H, Ph), 7.47 – 7.42 (t, *J* = 7.1 Hz, 4H, Ph), 7.34 – 7.25 (m, 7H, Ph), 7.17 – 7.15 (m, 3H, Ph), 6.91 (d, *J* = 7.8 Hz, 2H, Ph), 5.58 – 5.48 (m, 4H, H-2<sup>Gal</sup>, H-1<sup>GlcN</sup>, H-7<sup>NeuAc</sup>, H-8<sup>NeuAc</sup>), 5.32 (s, 1H, PhCH-), 4.80 (d, *J* = 7.8 Hz, 1H, H-1<sup>Gal</sup>), 4.53 (dd, *J* = 10.2, 3.0 Hz, 1H, H-3<sup>Gal</sup>), 4.47 – 4.40 (m, 3H, H-3<sup>GlcN</sup>, H-6<sup>NeuAc</sup>, H-9<sup>NeuAc</sup>), 4.24 – 4.10 (m, 6H, H-4<sup>Gal</sup>, H-5<sup>Gal</sup>, H-6a<sup>Gal</sup>, H-2<sup>GlcN</sup>, Ph-CH<sub>2</sub>-), 3.98 (dd, *J* = 12.0, 7.8 Hz, 1H, H-9<sup>NeuAc</sup>), 3.74 – 3.59 (m, 4H, H-4<sup>NeuAc</sup>, H-4<sup>GlcN</sup>, H-5<sup>GlcN</sup>, H-6a<sup>Gal</sup>), 3.56 – 3.47 (m, 3H, H-5<sup>NeuAc</sup>, H-6a,6b<sup>GlcN</sup>), 3.36 (s, 3H, -COOCH<sub>3</sub>), 2.90 (dd, *J* = 12.0, 2.4 Hz, 1H, H-3eq<sup>NeuAc</sup>), 2.43 (s, 3H, -OAc), 2.22 (s, 3H, Ph-CH<sub>3</sub>), 2.16 (s, 3H, -OAc), 1.99 (s, 3H, -OAc), 1.94 (s, 3H, -OAc), 1.70 (t, *J* = 12.6 Hz, 1H, H-3ax<sup>NeuAc</sup>). <sup>13</sup>C NMR (150 MHz, CDCl<sub>3</sub>)  $\delta$ : 172.13, 171.00, 170.38, 170.04, 168.46, 167.99, 167.75, 164.78, 153.34, 138.50, 137.92, 137.47, 133.97, 133.91, 133.44, 133.20, 131.85, 131.73, 129.89, 129.82, 129.47, 129.01, 128.59, 128.18, 128.14, 128.11, 127.34, 127.31, 126.38, 123.61, 123.25, 101.52 (C-1<sup>Gal</sup>), 100.57 (Ph-CH-), 96.81, 83.29 (C-1<sup>GlcN</sup>), 82.05, 78.00, 75.03, 74.79, 72.84, 72.40, 72.13, 71.51, 71.05, 70.07, 68.60, 68.34, 67.76, 66.40, 64.00, 58.77, 55.11, 52.91, 37.18, 24.64, 21.34, 21.06, 20.84, 20.81. HR ESI-TOF MS (*m/z*): calcd for C<sub>67</sub>H<sub>68</sub>N<sub>2</sub>O<sub>24</sub>SNa [M + Na]<sup>+</sup>, 1339.3780; found, 1339.3838.

**Preactivation-based one-pot synthesis of fully protected heptasaccharide 3: 2-Azidoethyl (methyl 5-acetamido-7,8,9-tri-*O*-acetyl-3,5-dideoxy-D-glycero- $\alpha$ -D-galacto-non-2-ulopyranosylonate)-(2 $\rightarrow$ 3)-(2-*O*-benzoyl-4,6-benzylidene- $\beta$ -D-galactopyranosyl)-(1 $\rightarrow$ 4)-(6-*O*-benzyl-2-deoxy-2-phthalimido- $\beta$ -D-glucopyranosyl)-(1 $\rightarrow$ 6)- (2,3,4-tri-*O*-benzyl- $\alpha$ -D-**

**glucopyranosyl)-(1→4)-[(2,3,4,6-tetra-*O*-benzoyl-β-D-glucopyranosyl)-(1→3)]-2-*O*-benzoyl-6-*O*-benzyl-β-D-galactopyranosyl)-(1→4)-2,3,6-tri-*O*-benzyl-β-D-glucopyranoside**

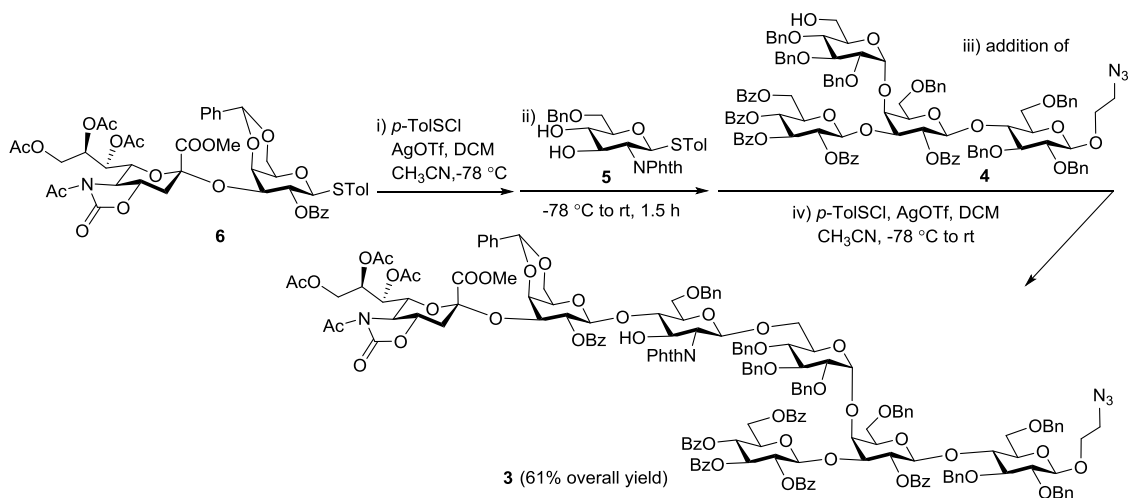

A mixture of **6** (60.0 mg, 0.064 mmol) and freshly activated MS 4 Å in anhydrous CH<sub>2</sub>Cl<sub>2</sub> (4 mL) was stirred at room temperature for 40 min and then cooled to -78 °C. A solution of AgOTf (49.5 mg, 0.193 mmol) in anhydrous acetonitrile (0.5 mL) was added, and the mixture was stirred for 10 min. Thereafter, *p*-TolSCl (9.3 μL, 0.064 mmol) was added through a microsyringe, and 15 min later, a solution of **5** (29.5 mg, 0.058 mmol) in anhydrous CH<sub>2</sub>Cl<sub>2</sub> (1 mL) was added. The reaction was allowed to warm up slowly to room temperature in 1 h, stirred for another 20 min, and then cooled to -78 °C. This was followed by sequential addition of **4** (100.0 mg, 0.053 mmol) in anhydrous CH<sub>2</sub>Cl<sub>2</sub> (1 mL), AgOTf (44.9 mg, 0.175 mmol) in CH<sub>3</sub>CN (0.5 mL), and *p*-TolSCl (8.4 μL, 0.058 mmol). The reaction mixture was allowed to warm up slowly to room temperature in 1 h, stirred for another 20 min, and then quenched with Et<sub>3</sub>N, diluted with CH<sub>2</sub>Cl<sub>2</sub>, and filtered. The filtrate was concentrated under vacuum, and the residue was purified by silica gel column chromatography with EtOAc and toluene (1:2) as the eluent to provide **3** (99.5 mg, 61% overall yield) as a foamy solid. <sup>1</sup>H NMR (600 MHz, CDCl<sub>3</sub>) δ: 7.93 (d, *J* = 7.2 Hz, 2H, Ph), 7.87 (d, *J* = 7.8 Hz, 2H, Ph), 7.85 (d, *J* = 7.8 Hz, 2H, Ph), 7.71 (d, *J* = 7.8 Hz, 1H, Ph), 7.61 (d, *J* = 7.8 Hz, 2H, Ph), 7.52 (t, *J* = 7.5 Hz, 1H, Ph), 7.48 – 7.25 (m, 22H, Ph), 7.24 – 7.07 (m, 38H, Ph), 7.02 – 6.98 (m, 5H, Ph), 6.95 – 6.91 (t, *J* = 7.2 Hz, 4H, Ph), 5.71 (t, *J* = 9.6 Hz, 1H, H-3<sup>Glc-A</sup>), 5.55 – 5.44 (m, 4H, H-7<sup>NeuAc</sup>, H-8<sup>NeuAc</sup>, H-4<sup>Glc-A</sup>, H-2<sup>Gal-B</sup>), 5.38 – 5.35 (m, 2H, H-2<sup>Glc-A</sup>, H-1<sup>GlcN</sup>), 5.33

(s, 1H, Ph-CH-), 5.30 (dd,  $J = 9.6, 8.4$  Hz, 1H, H-2<sup>Glc-A</sup>), 4.95 (d,  $J = 11.4$  Hz, 1H, Bn), 4.88 (d,  $J = 3.0$  Hz, 1H, H-1<sup>Glc-C</sup>), 4.87 (d,  $J = 8.4$  Hz, 1H, H-1<sup>Glc-A</sup>), 4.83 (d,  $J = 8.4$  Hz, 1H, H-1<sup>Glc-B</sup>), 4.71 (d,  $J = 11.4$  Hz, 1H, Bn), 4.65 (d,  $J = 12.0$  Hz, 1H, Bn), 4.58 (d,  $J = 7.8$  Hz, 1H, H-1<sup>Glc-A</sup>), 4.55 – 4.50 (m, 2H, H-3<sup>GlcN</sup>, Bn), 4.46 – 4.31 (m, 13H, H-6<sup>NeuAc</sup>, H-9<sup>NeuAc</sup>, H-6b<sup>Glc-A</sup>, H-3<sup>Glc-B</sup>, H-2<sup>GlcN</sup>, Bn), 4.26 – 4.06 (m, 14H, H-1<sup>Glc-B</sup>, H-4<sup>Gal-B</sup>, H-4<sup>Gal-A</sup>, H-6a<sup>Glc-A</sup>), 4.03 – 3.96 (m, 2H, H-9<sup>NeuAc</sup>, H-5<sup>Glc-A</sup>), 3.89 – 3.81 (m, 4H, H-4<sup>GlcN</sup>, H-3<sup>Glc-C</sup>, H-5<sup>GlcN</sup>, -OCH<sub>2</sub>-), 3.76 (t,  $J = 9.3$  Hz, 1H, H-4<sup>Glc-B</sup>), 3.73 – 3.67 (m, 3H, H-4<sup>NeuAc</sup>), 3.65 (dd,  $J = 9.6, 2.4$  Hz, 1H, H-3<sup>Gal-A</sup>), 3.60 – 3.42 (m, 8H, H-5<sup>NeuAc</sup>, H-3<sup>Glc-B</sup>, -OCH<sub>2</sub>-, H-6a,6b<sup>GlcN</sup>), 3.36 – 3.31 (m, 5H, -COOCH<sub>3</sub>, -CH<sub>2</sub>-N<sub>3</sub>, H-6a<sup>Glc-B</sup>), 3.29 – 3.20 (m, 4H, H-6b<sup>Glc-B</sup>, H-2<sup>Glc-C</sup>, H-2<sup>Glc-B</sup>, -CH<sub>2</sub>-N<sub>3</sub>), 3.01 (d,  $J = 10.2$  Hz, 1H, H-5<sup>Glc-B</sup>), 2.84 (dd,  $J = 12.0, 3.0$  Hz, 1H, H-3eq<sup>NeuAc</sup>), 2.43 (s, 3H, -OAc), 2.15 (s, 3H, -OAc), 1.97 (s, 3H, -OAc), 1.90 (s, 3H, -OAc), 1.63 (d,  $J = 12.6$  Hz, 1H, H-3ax<sup>NeuAc</sup>). <sup>13</sup>C NMR (150 MHz, CDCl<sub>3</sub>)  $\delta$ : 172.02, 170.87, 170.21, 169.93, 168.36, 168.25, 168.00, 165.96, 165.71, 164.90, 164.83, 164.40, 163.86, 153.36, 139.18, 139.01, 138.83, 138.51, 138.47, 138.31, 137.60, 133.52, 133.36, 133.28, 133.23, 133.02, 132.62, 132.24, 131.59, 131.57, 129.83, 129.66, 129.58, 129.51, 129.48, 129.32, 129.21, 128.92, 128.83, 128.51, 128.46, 128.36, 128.28, 128.22, 128.17, 128.06, 127.98, 127.92, 127.85, 127.84, 127.79, 127.74, 127.56, 127.48, 127.43, 127.35, 127.29, 127.19, 126.99, 126.92, 126.82, 126.73, 126.45, 123.34, 123.04, 103.23 (C-1<sup>Glc-B</sup>), 102.35 (C-1<sup>Glc-A</sup>), 101.45 (C-1<sup>Gal-B</sup>), 100.75 (C-1<sup>Gal-A</sup>), 100.53 (Ph-CH-), 99.21 (C-1<sup>Glc-C</sup>), 98.48 (C-1<sup>GlcN</sup>), 96.88, 81.92, 81.52, 81.21, 80.30, 79.60, 77.42, 77.09, 76.86, 75.01, 74.79, 74.72, 74.67, 74.42, 74.24, 74.21, 73.66, 73.28, 73.14, 72.96, 72.89, 72.68, 72.25, 72.09, 71.63, 71.40, 71.23, 70.20, 70.11, 69.70, 68.49, 68.43, 68.38, 68.19, 67.92, 66.37, 63.72, 63.19, 58.83, 56.13, 52.86, 50.83, 37.10, 24.63, 21.28, 20.77, 20.74. HR ESI-TOF MS (m/z): calcd for C<sub>170</sub>H<sub>167</sub>N<sub>5</sub>O<sub>50</sub>Na<sub>2</sub> [M + 2Na]<sup>2+</sup>, 1562.0237; found, 1562.0254.

**2-Aminoethyl (5-acetamido-3,5-dideoxy-D-glycero- $\alpha$ -D-galacto-non-2-ulopyranosylonic acid)-(2 $\rightarrow$ 3)- $\beta$ -D-galactopyranosyl-(1 $\rightarrow$ 4)-(2-acetamido-2-deoxy- $\beta$ -D-glucopyranosyl)-(1 $\rightarrow$ 6)- $\alpha$ -D-glucopyranosyl-(1 $\rightarrow$ 4)-[ $\beta$ -D-glucopyranosyl-(1 $\rightarrow$ 3)]- $\beta$ -D-galactopyranosyl-(1 $\rightarrow$ 4)- $\beta$ -D-glucopyranoside (2):**

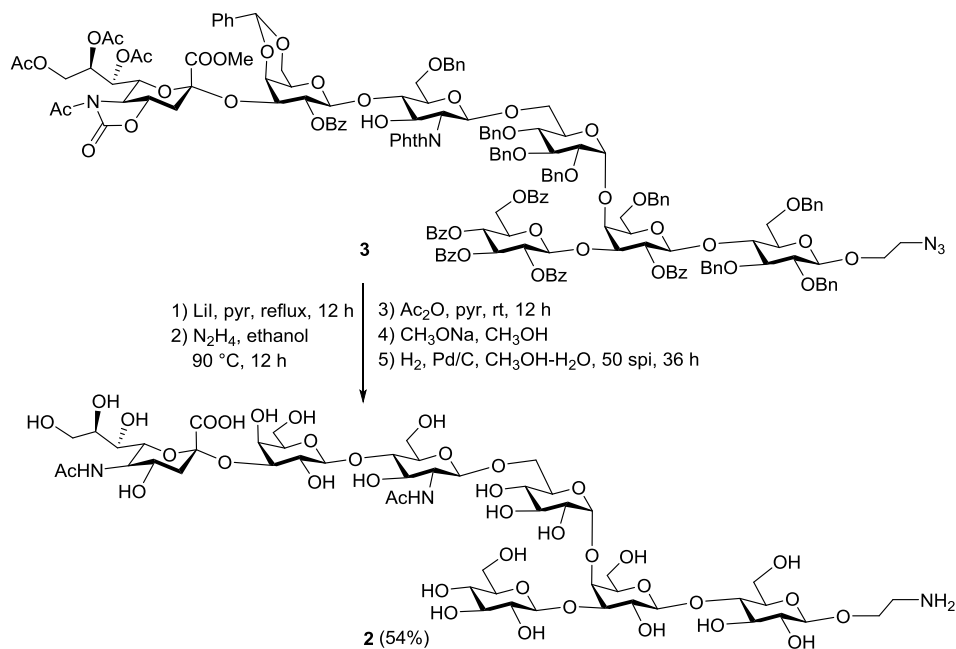

To a solution of **3** (50 mg, 0.016 mmol) in anhydrous pyridine (8 mL) was added lithium iodide (200 mg). The mixture was refluxed with stirring at 120 °C for 12 h under a N<sub>2</sub> atmosphere, and then concentrated and co-evaporated with toluene under vacuum. After the residue was dissolved in ethanol (5 mL), NH<sub>2</sub>-NH<sub>2</sub>·H<sub>2</sub>O (1 mL) was added, and the mixture was stirred under refluxing for 12 h, at which time MALDI-MS indicated the completion of reaction. The reaction mixture was then concentrated and co-evaporated with toluene to afford a solid, which was dissolved in pyridine (5 mL) and Ac<sub>2</sub>O (1 mL). After the solution was stirred at room temperature for 12 h, it was concentrated under vacuum. The residue was dissolved in CH<sub>3</sub>OH, and to the solution was added CH<sub>3</sub>ONa (1M in CH<sub>3</sub>OH) until pH reached 10. The reaction mixture was stirred at room temperature for another 6 h, at which time MALDI-MS indicated the completion of reaction. The mixture was neutralized with Amberlyst 15 H<sup>+</sup> resin, filtered, and the filtrate was concentrated under vacuum. The residue was applied to a Sephadex LH-20 gel column for purification using CH<sub>3</sub>OH as eluent to give a solid. The solid was dissolved in CH<sub>3</sub>OH and H<sub>2</sub>O (V/V = 4:1, 5 mL) and then mixed with Pd/C (10 mg). After the mixture was shaken under a H<sub>2</sub> atmosphere at 50 psi for 36 h, it was filtered. The filtrate was concentrated to give a residue, which was purified by a Sephadex G-15 gel column with H<sub>2</sub>O as eluent to produce the synthetic target **2** (12 mg, 54% for five steps) as a white solid. <sup>1</sup>H NMR (600 MHz, D<sub>2</sub>O) δ: 4.72 (d, *J* = 3.6 Hz, 1H), 4.45 (d, *J* =

7.8 Hz, 1H), 4.39 (d,  $J = 7.8$  Hz, 1H), 4.37 (d,  $J = 8.4$  Hz, 2H), 4.35 (d,  $J = 7.8$  Hz, 1H), 4.16 (d,  $J = 10.8$  Hz, 1H), 4.09 (s, 1H), 3.97-3.93 (m, 3H), 3.85 – 3.64 (m, 15H), 3.62 – 3.40 (m, 19H), 3.35 – 3.29 (m, 3H), 3.27 – 3.19 (m, 3H), 3.08 (t,  $J = 6.0$  Hz, 1H), 2.99 (t,  $J = 8.4$  Hz, 1H), 2.59 (dd,  $J = 12.2, 4.5$  Hz, 1H), 1.89 (s, 3H), 1.86 (s, 3H), 1.63 (t,  $J = 12.0$  Hz, 1H).  $^{13}\text{C}$  NMR (150 MHz,  $\text{D}_2\text{O}$ )  $\delta$ : 174.93, 174.41, 173.77, 104.55, 102.86, 102.46, 101.90, 101.40, 99.73, 99.05, 80.88, 79.87, 78.53, 78.02, 75.75, 75.61, 75.46, 75.41, 75.09, 74.71, 74.49, 74.27, 73.48, 72.81, 72.76, 72.49, 72.17, 71.68, 71.46, 71.43, 70.44, 70.01, 69.83, 69.31, 68.82, 68.26, 68.02, 67.39, 67.37, 66.99, 66.98, 62.50, 60.95, 60.85, 60.02, 59.98, 59.89, 54.97, 51.60, 39.56, 39.48, 22.15, 21.95. HR ESI-TOF MS ( $m/z$ ): calcd for  $\text{C}_{51}\text{H}_{87}\text{N}_3\text{O}_{39}\text{Na}$   $[\text{M} + \text{Na}]^+$ , 1388.4814; found, 1388.4734.

## II. NMR and MS Spectra

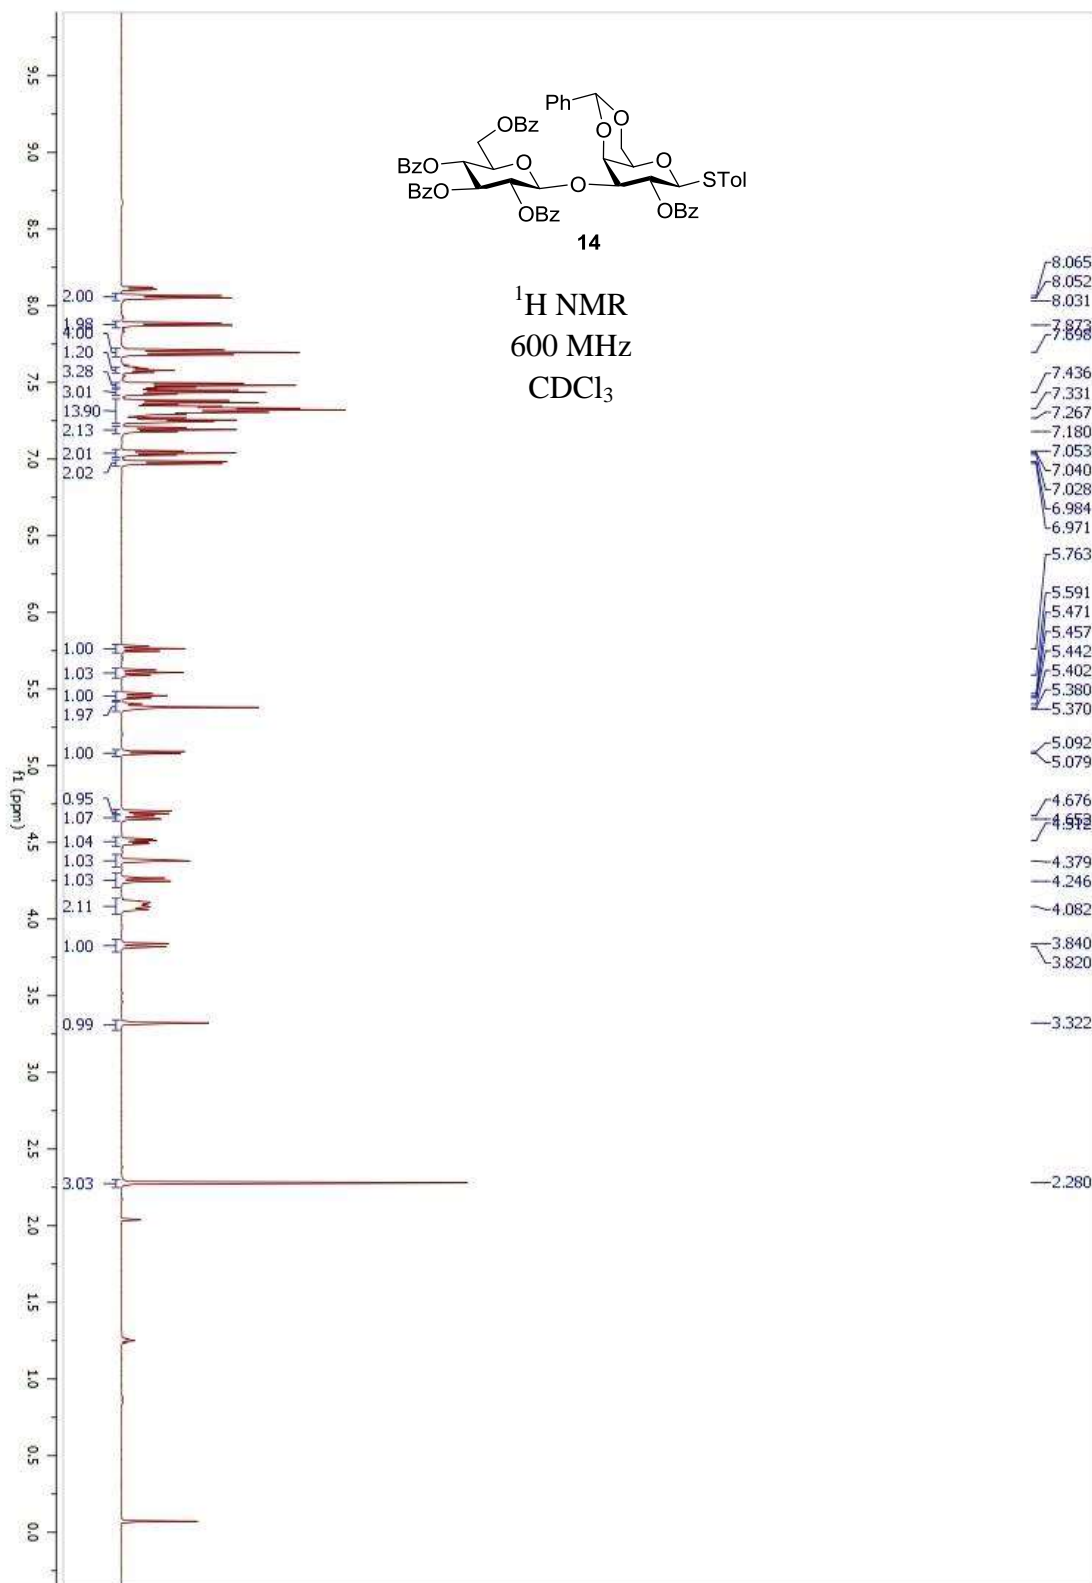



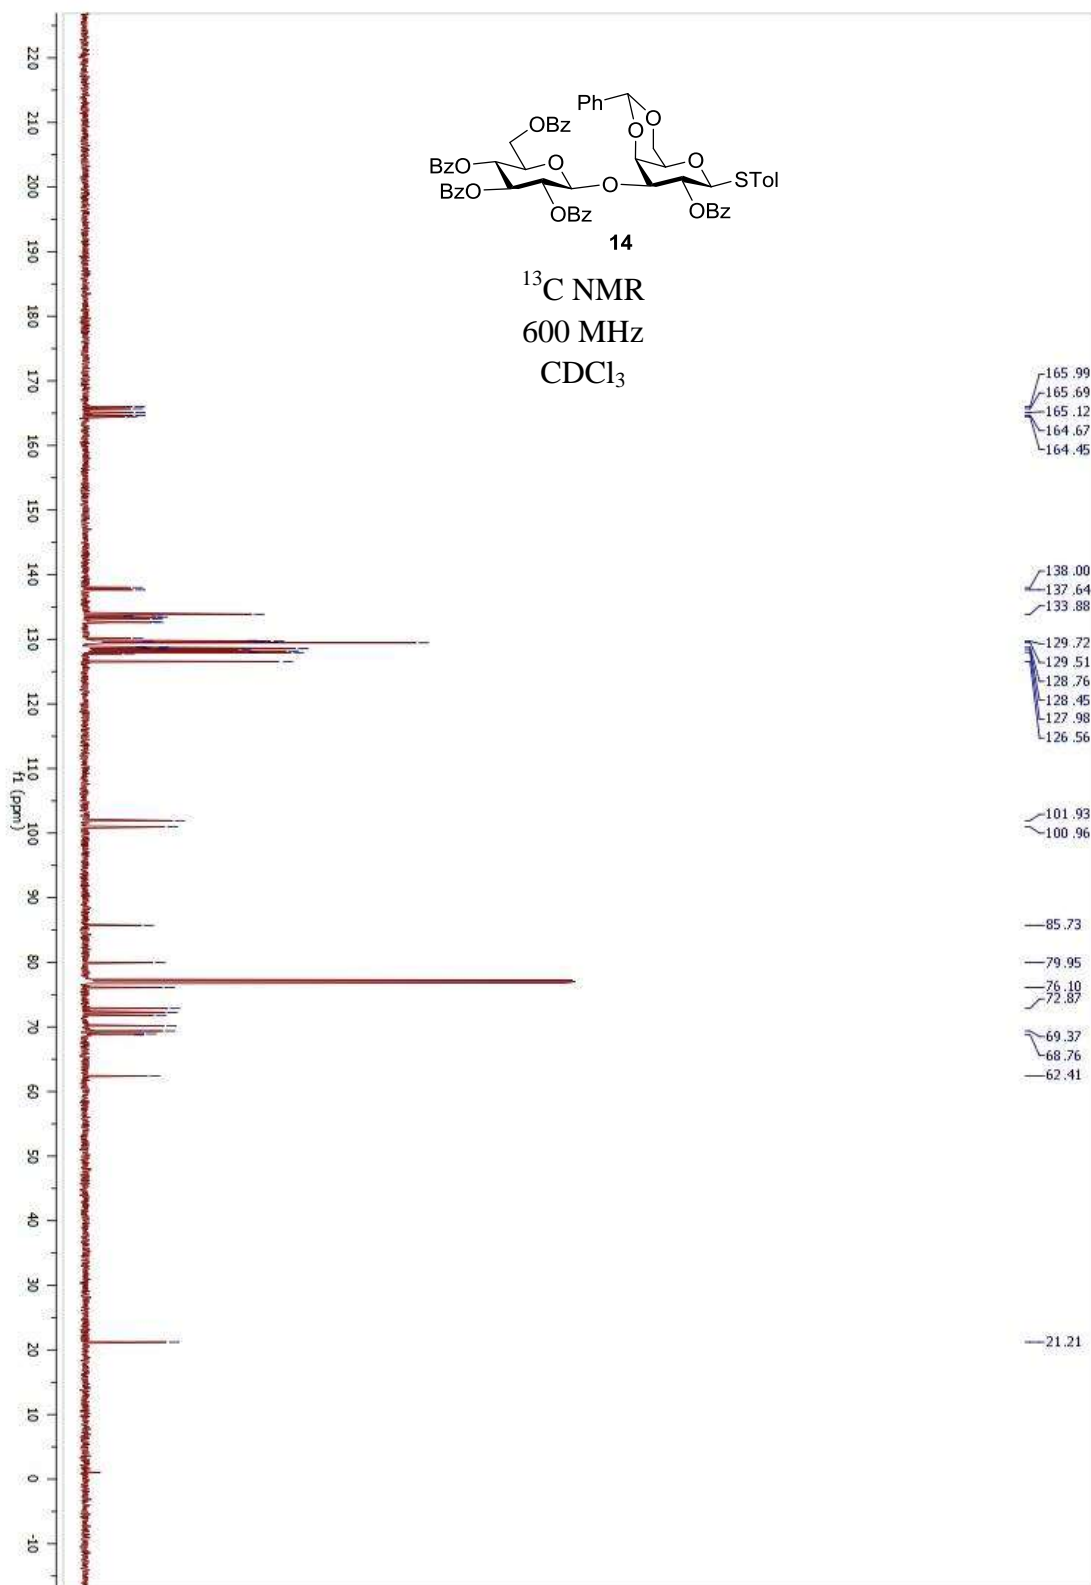

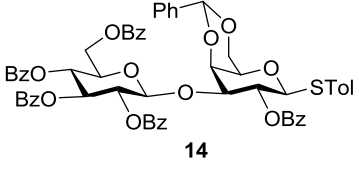

<sup>1</sup>H-<sup>1</sup>H COSY  
600 MHz  
CDCl<sub>3</sub>

Sample Name:  
Data collected on:  
4600-vnmr600  
Archive directory:  
/home/vnmr1/vnmrswg/prbha/prbha-0118a  
Sample directory:  
F2dir1a: gcosy  
Pulse sequence: gcosy  
Solvent: cdcl3  
Data collected on: Jul 4 2015

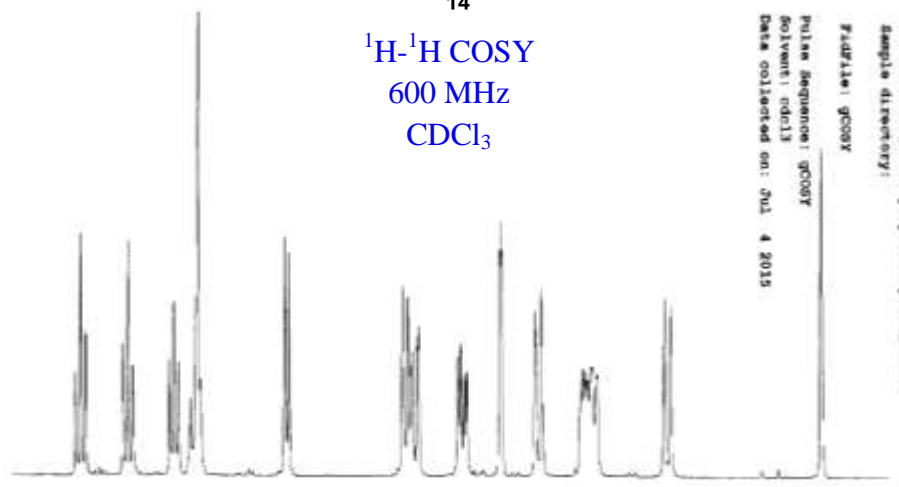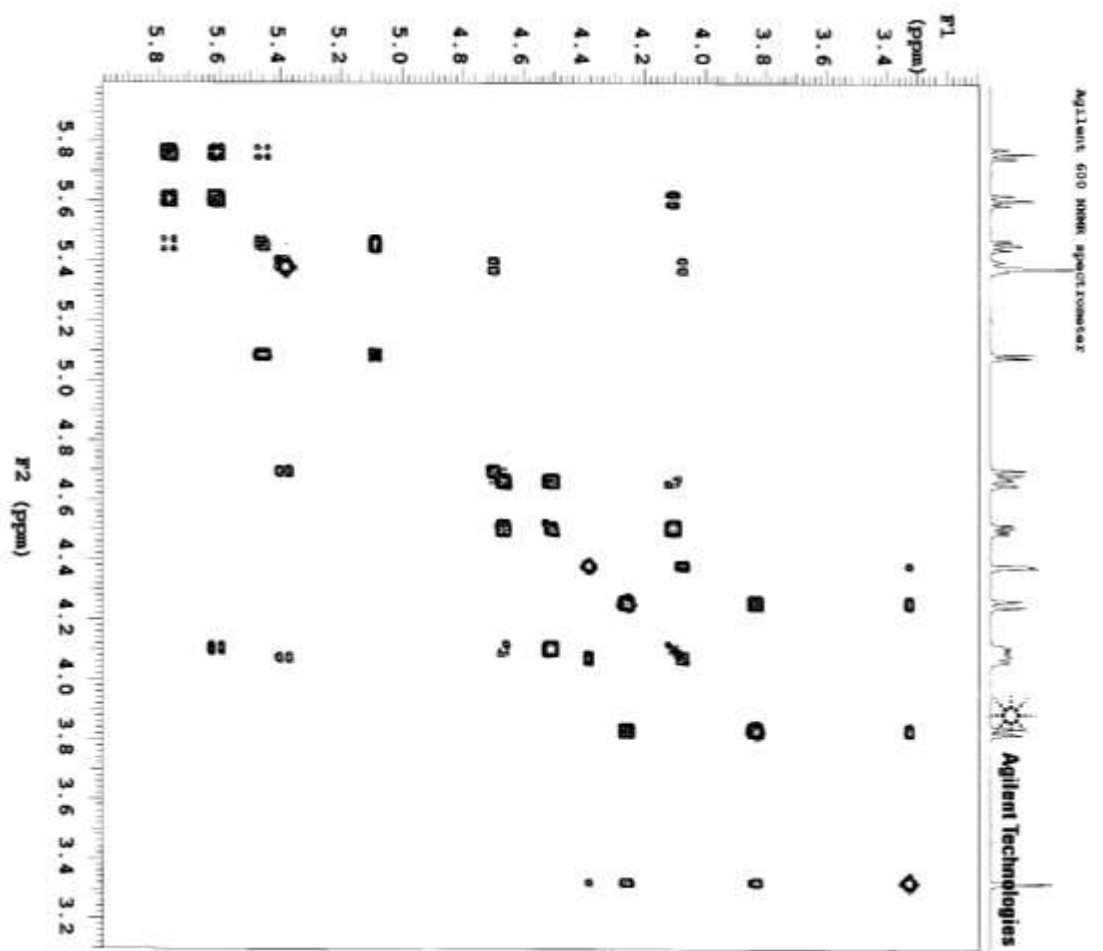

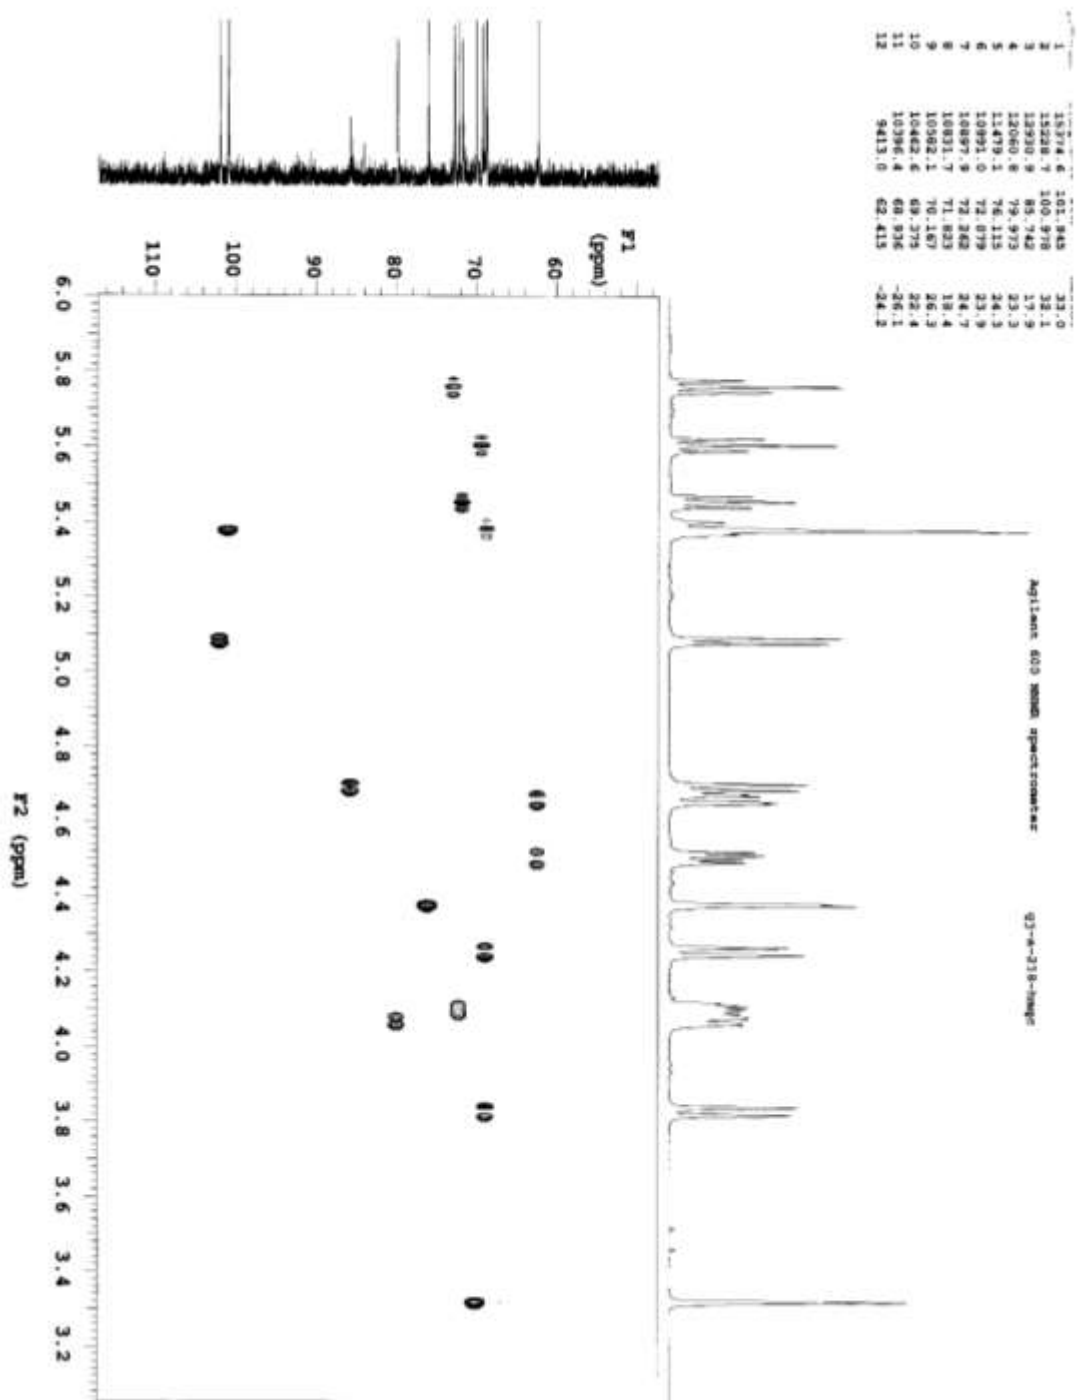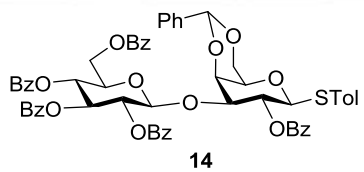

$^1\text{H}$ - $^{13}\text{C}$  HMQC  
600/150 MHz  
 $\text{CDCl}_3$

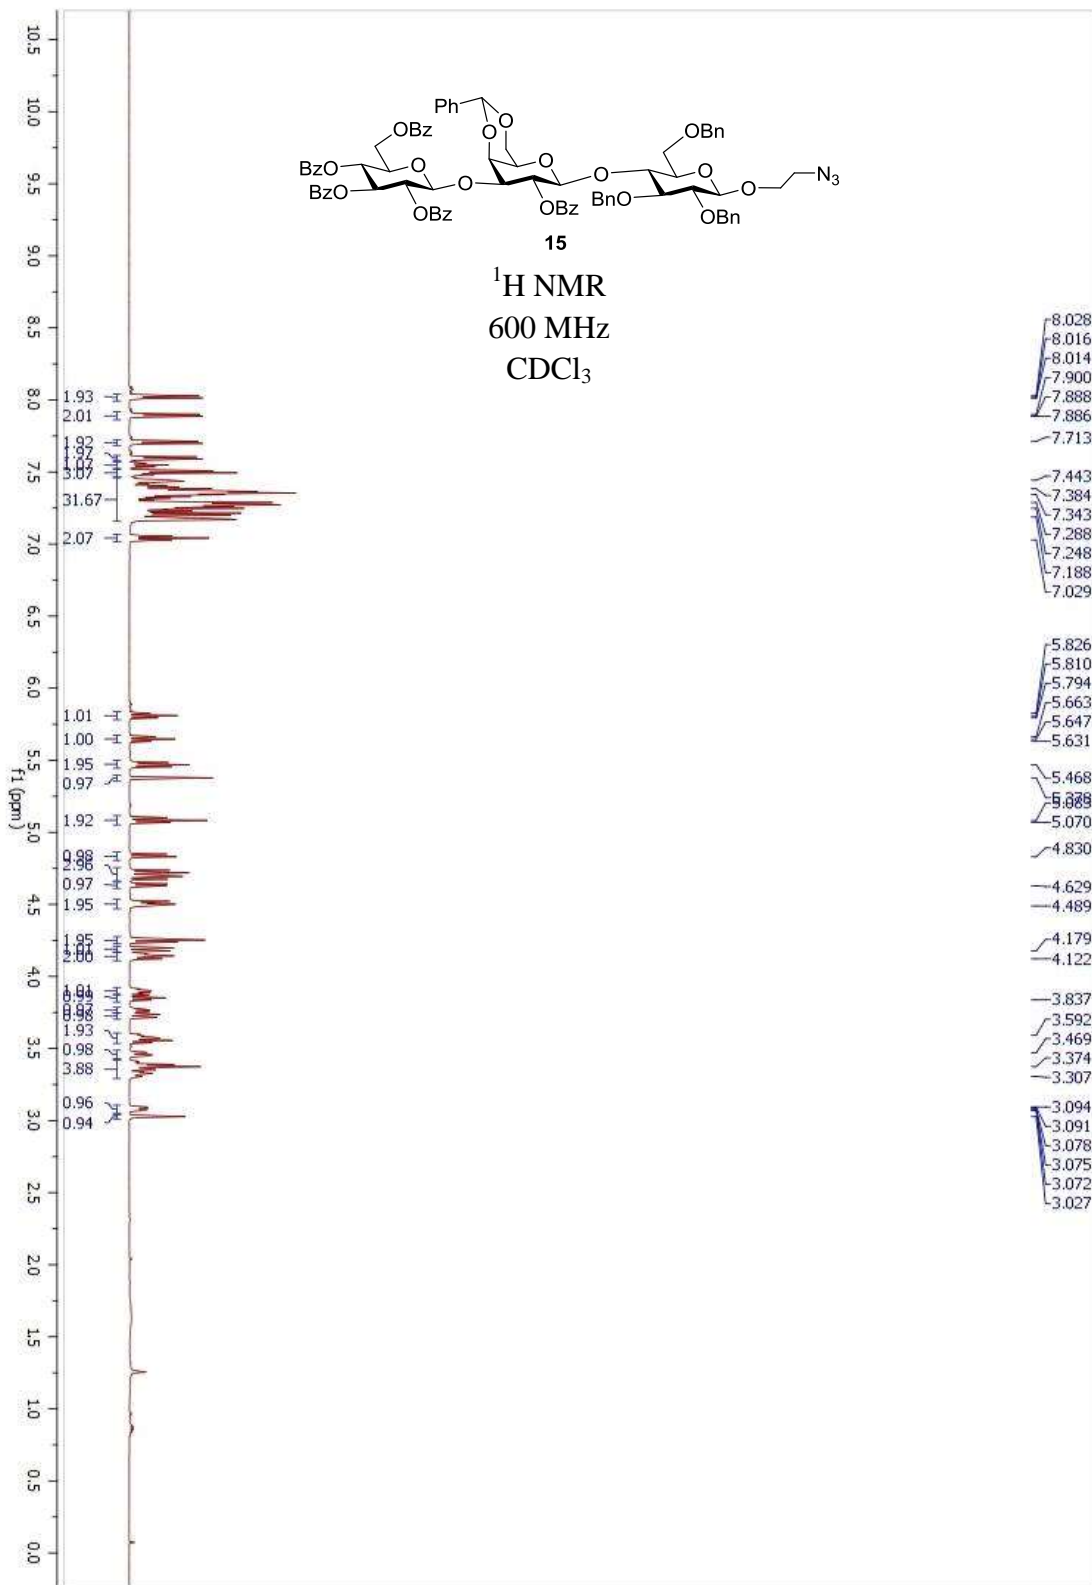

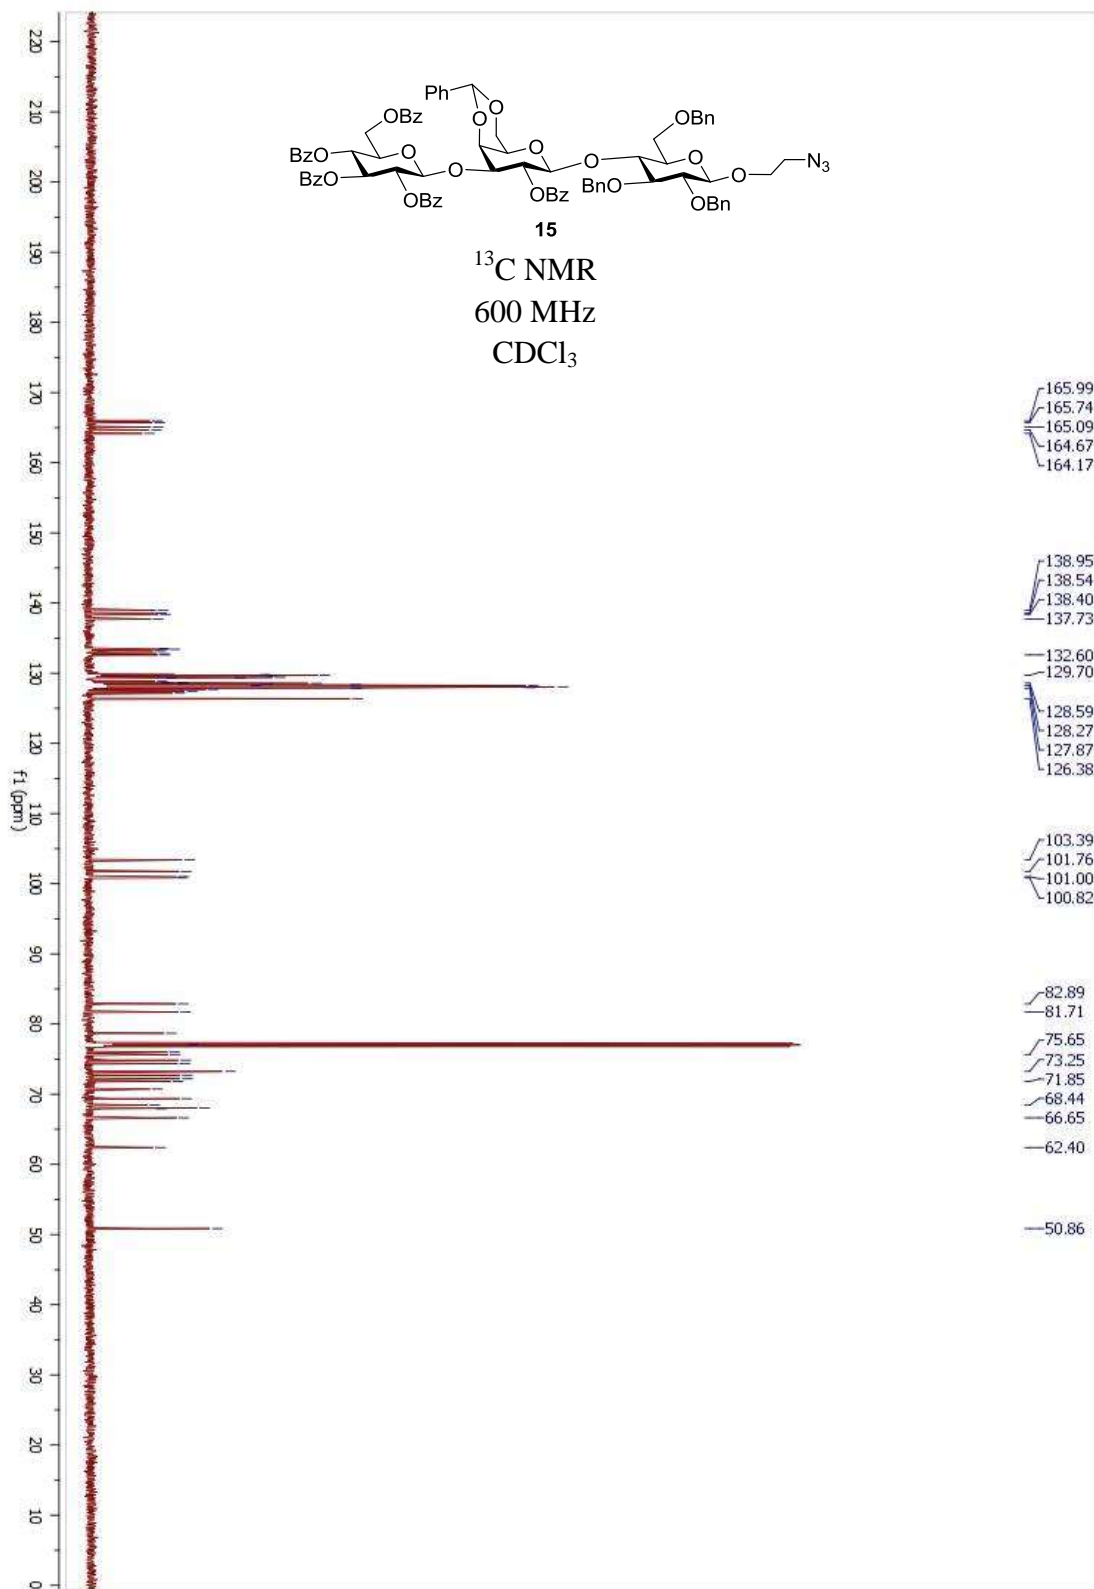

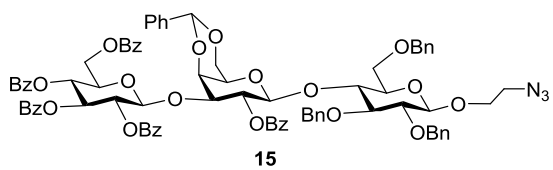

$^1\text{H}-^1\text{H}$  COSY  
 600 MHz  
 $\text{CDCl}_3$

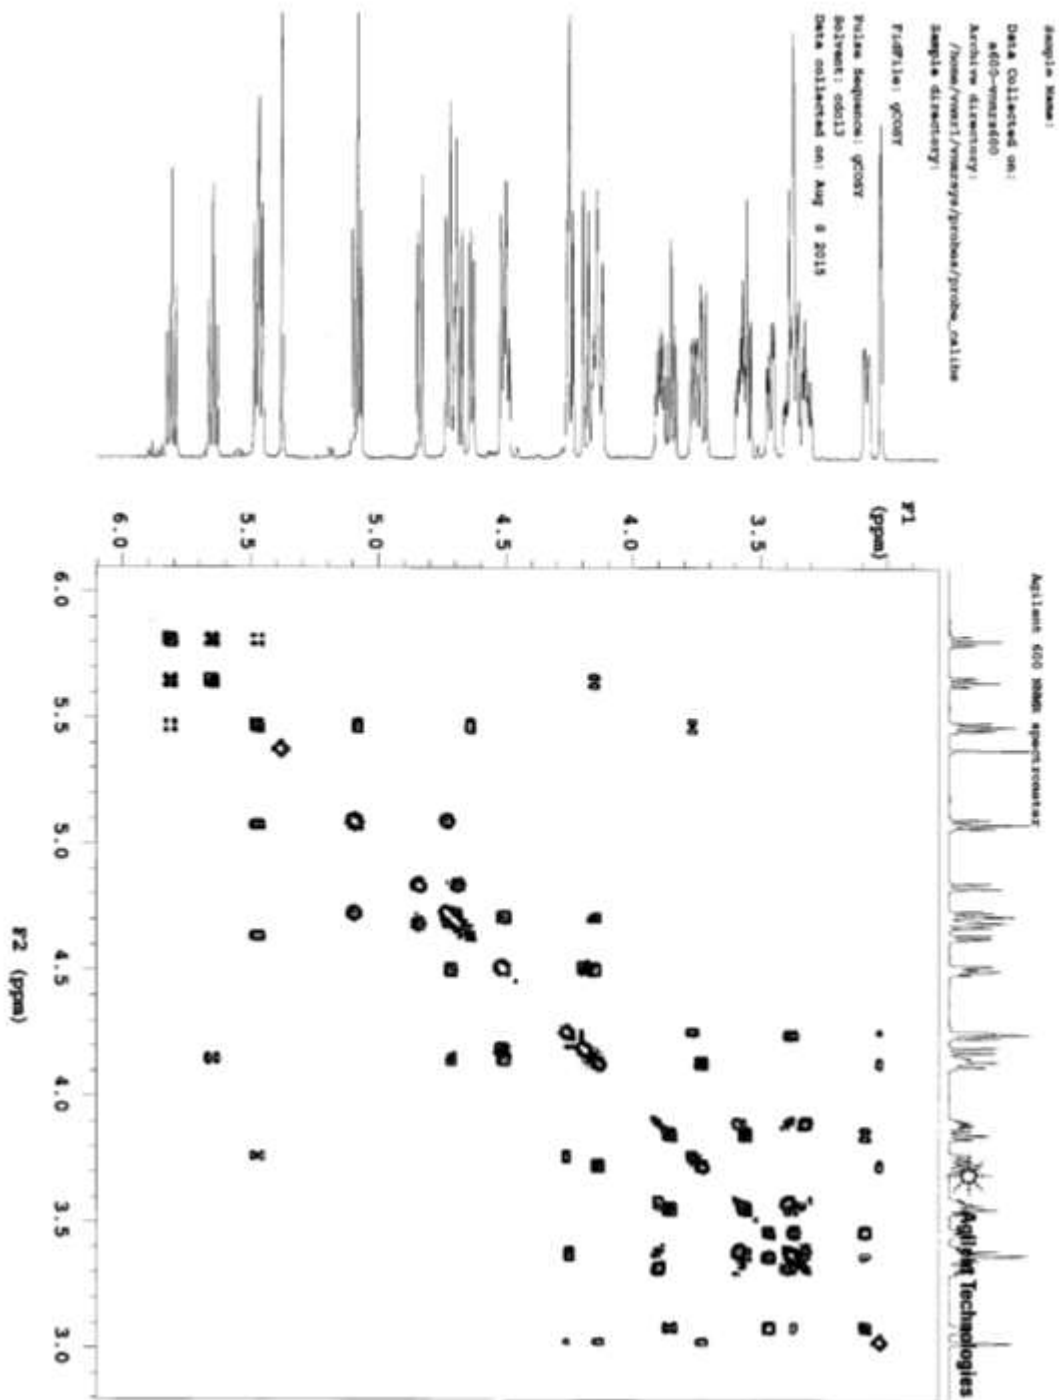

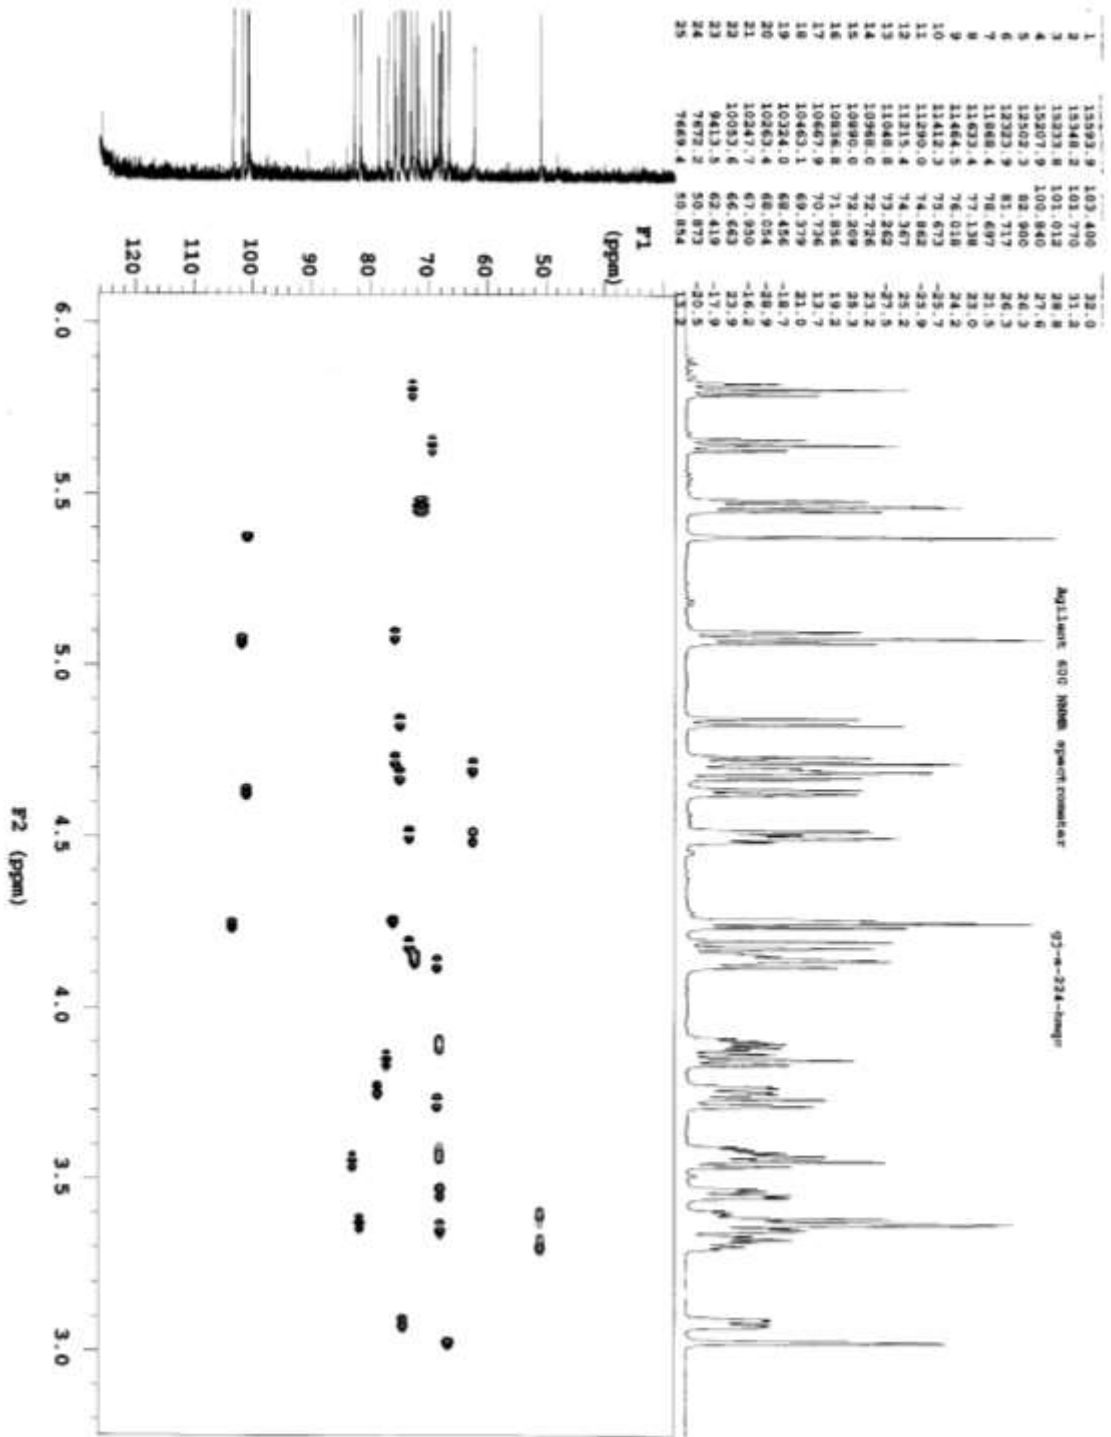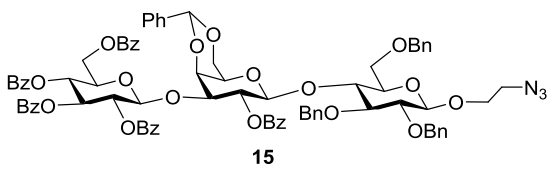

<sup>1</sup>H-<sup>13</sup>C HMQC  
 600/150 MHz  
 CDCl<sub>3</sub>

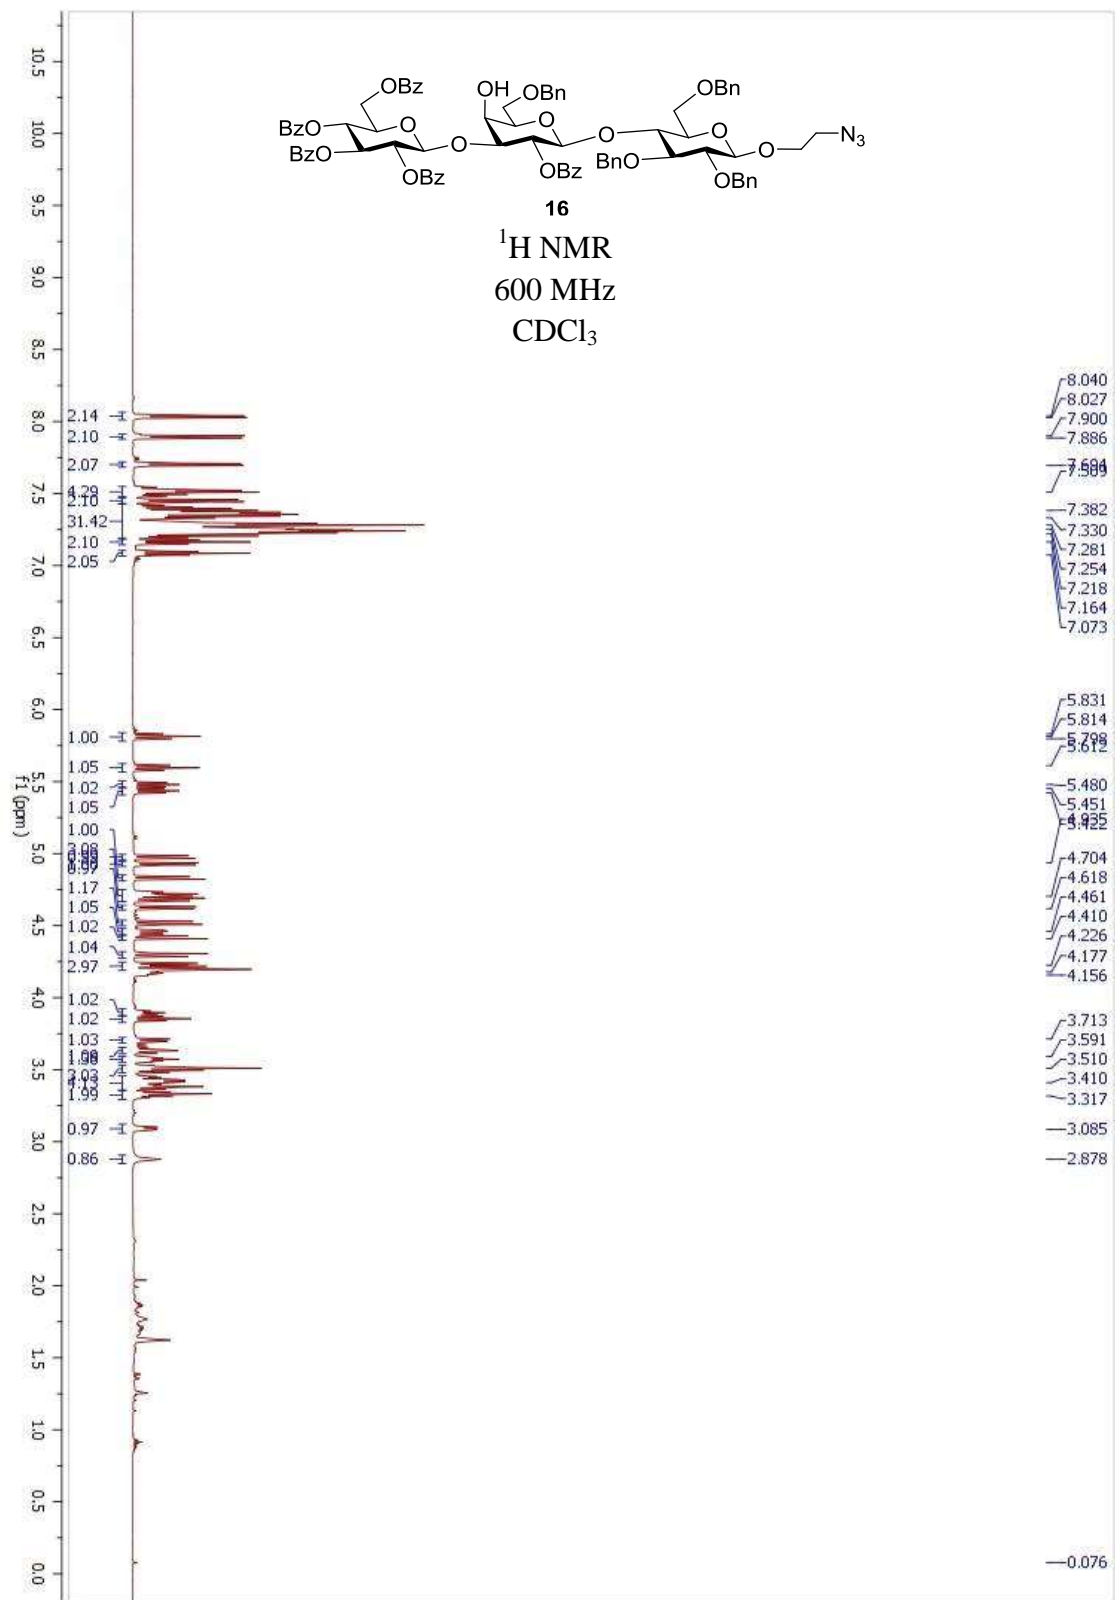



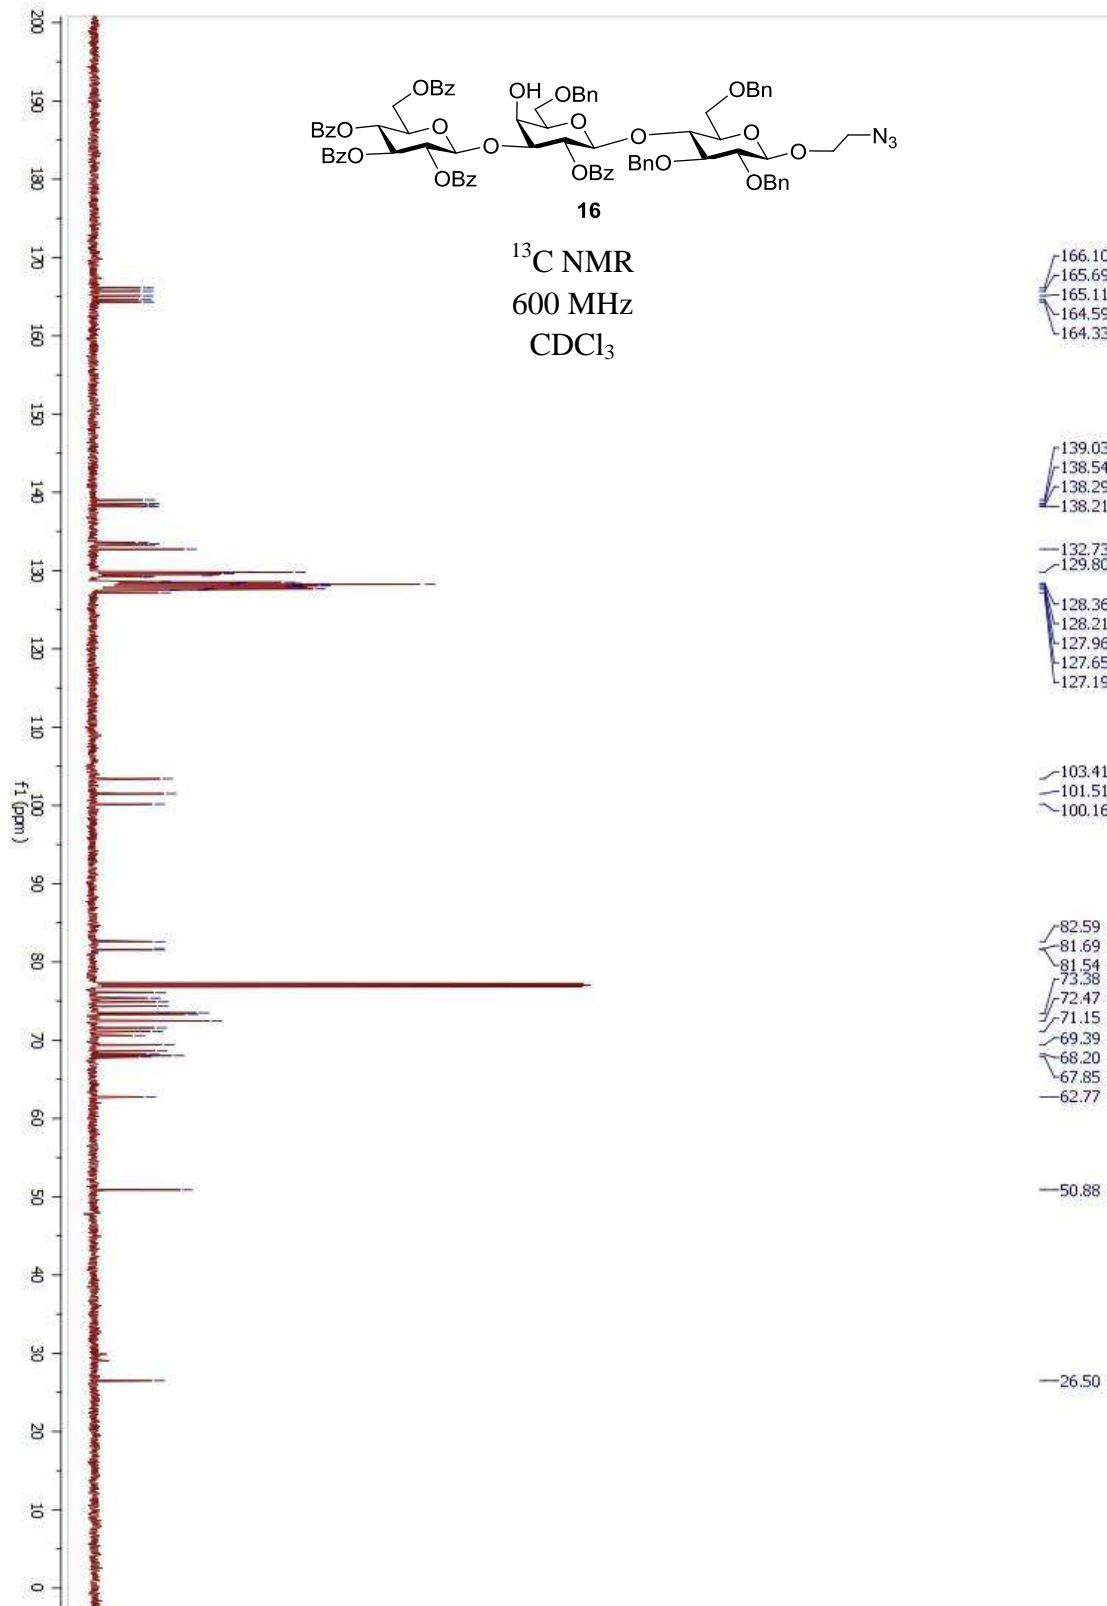





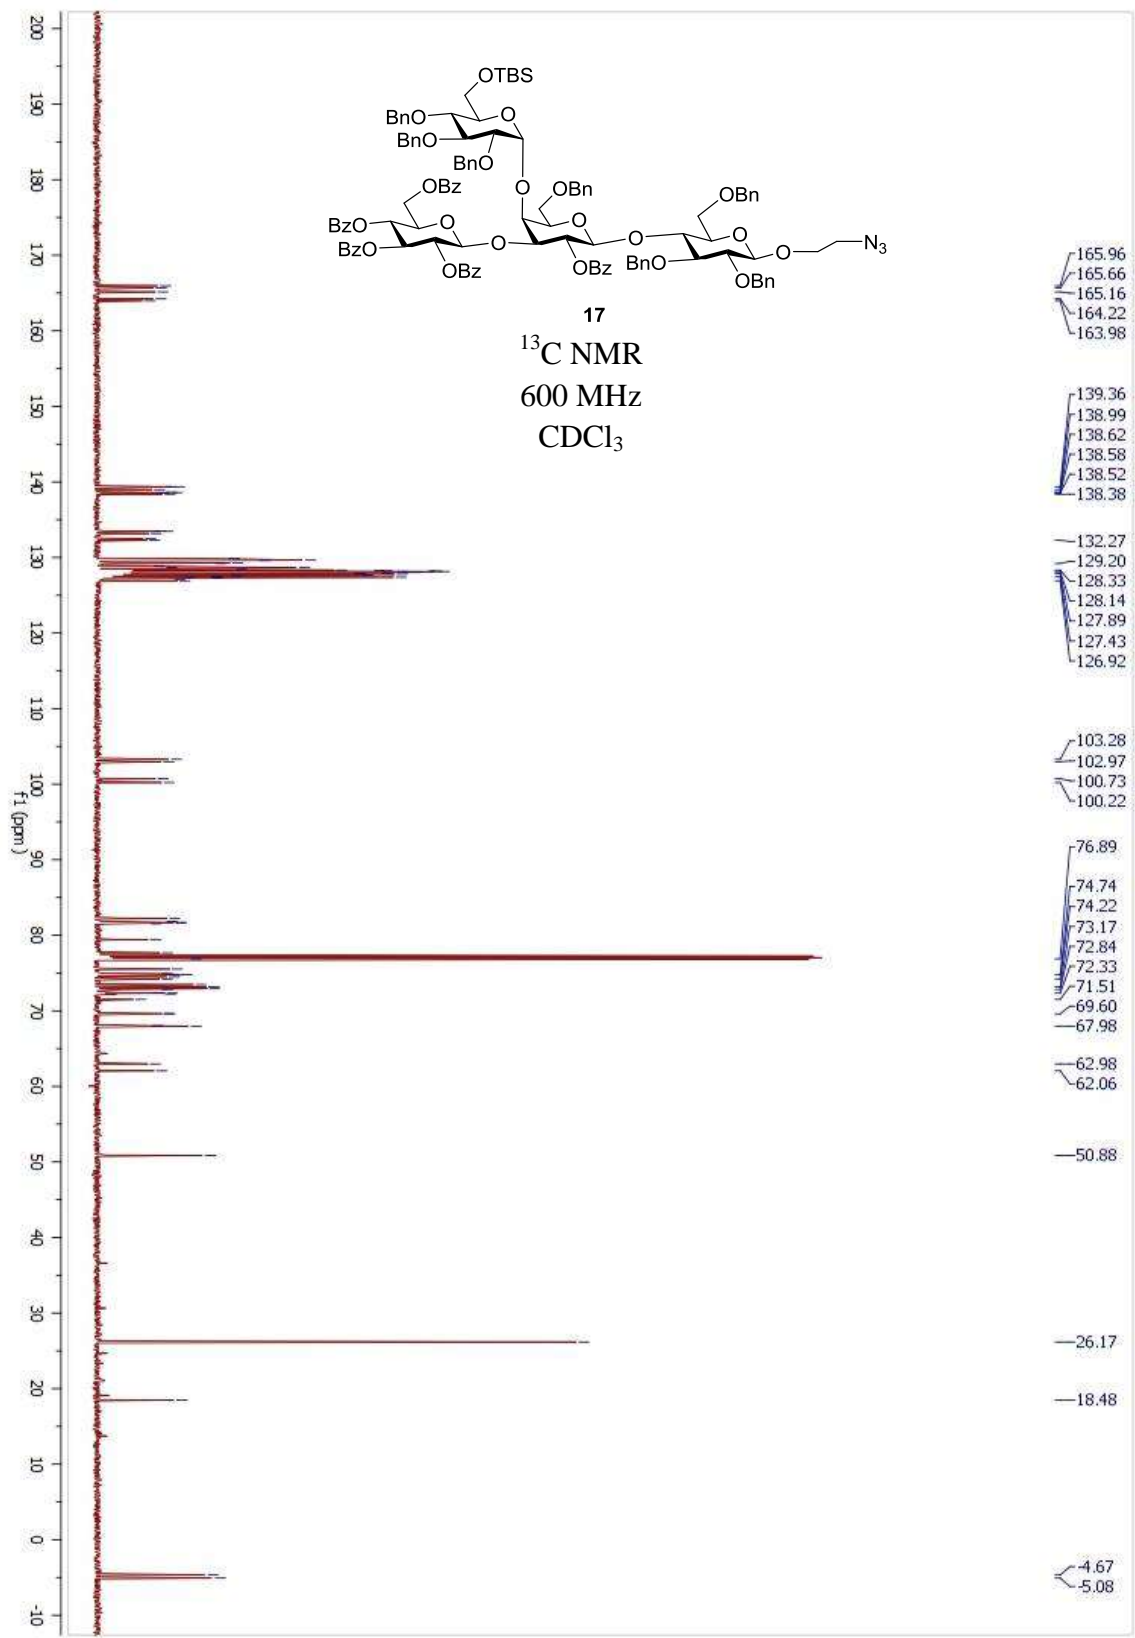

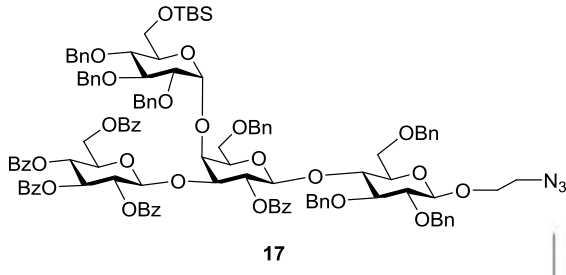

<sup>1</sup>H-<sup>1</sup>H COSY  
600 MHz  
CDCl<sub>3</sub>

Sample Name:  
Data Collected on:  
600-Vnmr500  
Archive directory:  
/home/vnmr1/vnmrlogs/proben/proba\_casiba  
Sample directory:  
FIDFile: gcosy  
Pulse Sequence: gcosy  
Solvent: cdcl3  
Data collected on: Nov 11 2015

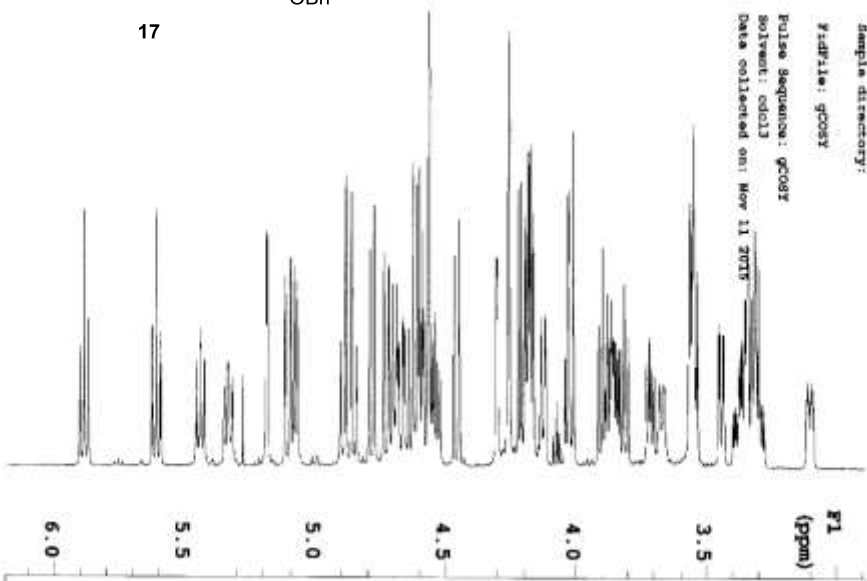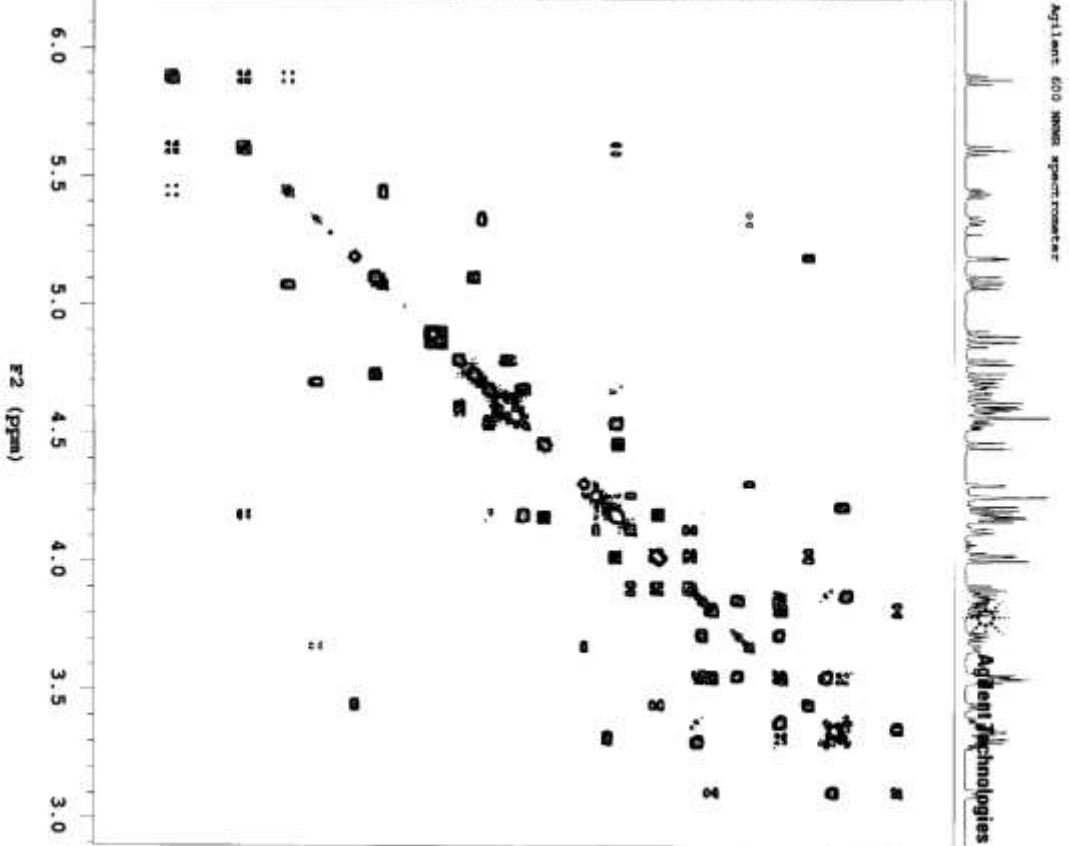

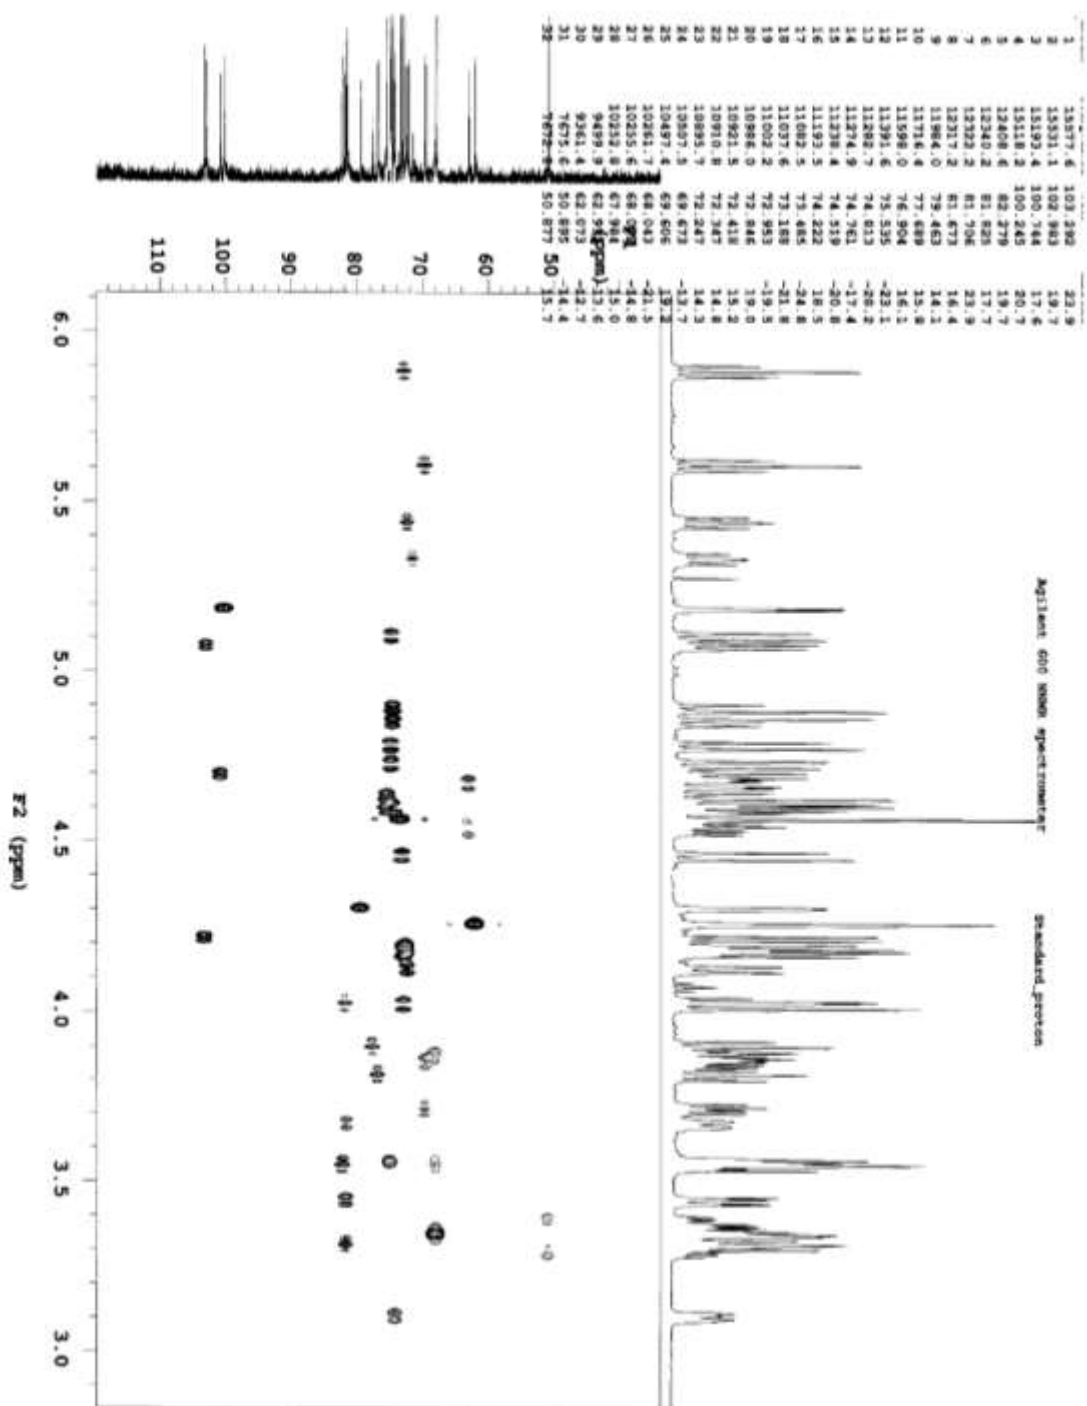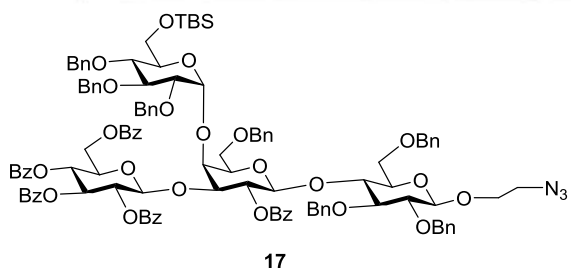

$^1\text{H}$ - $^{13}\text{C}$  HMQC  
600/150 MHz  
 $\text{CDCl}_3$

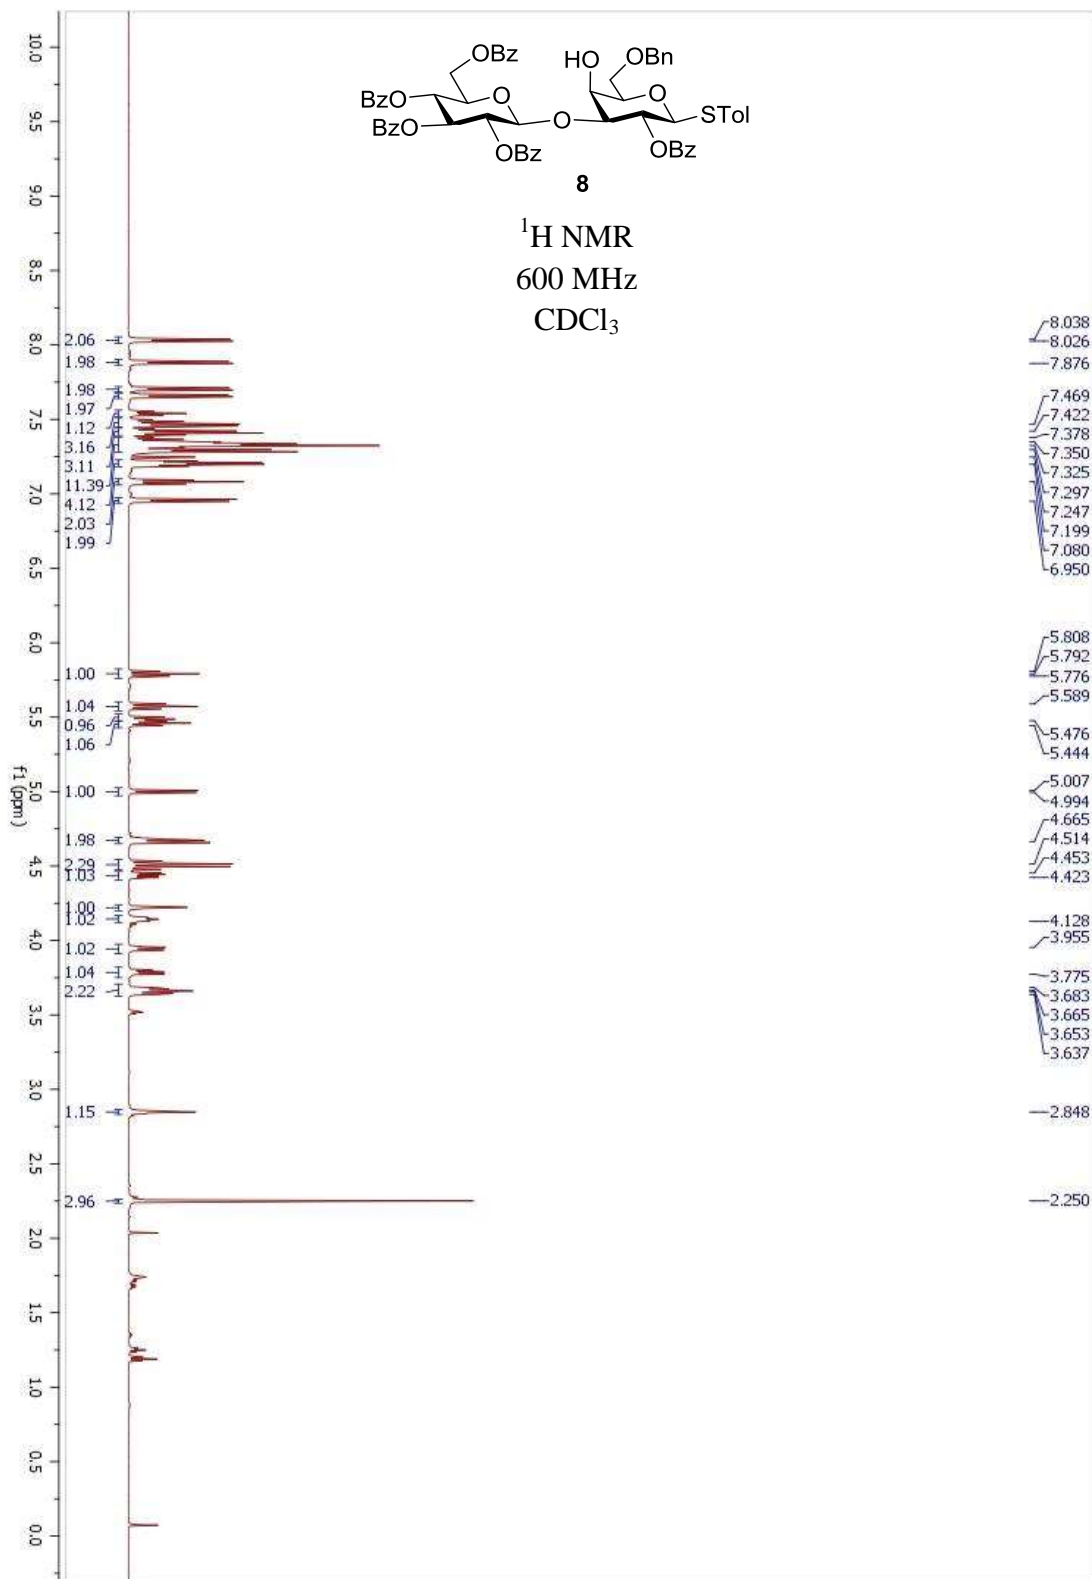

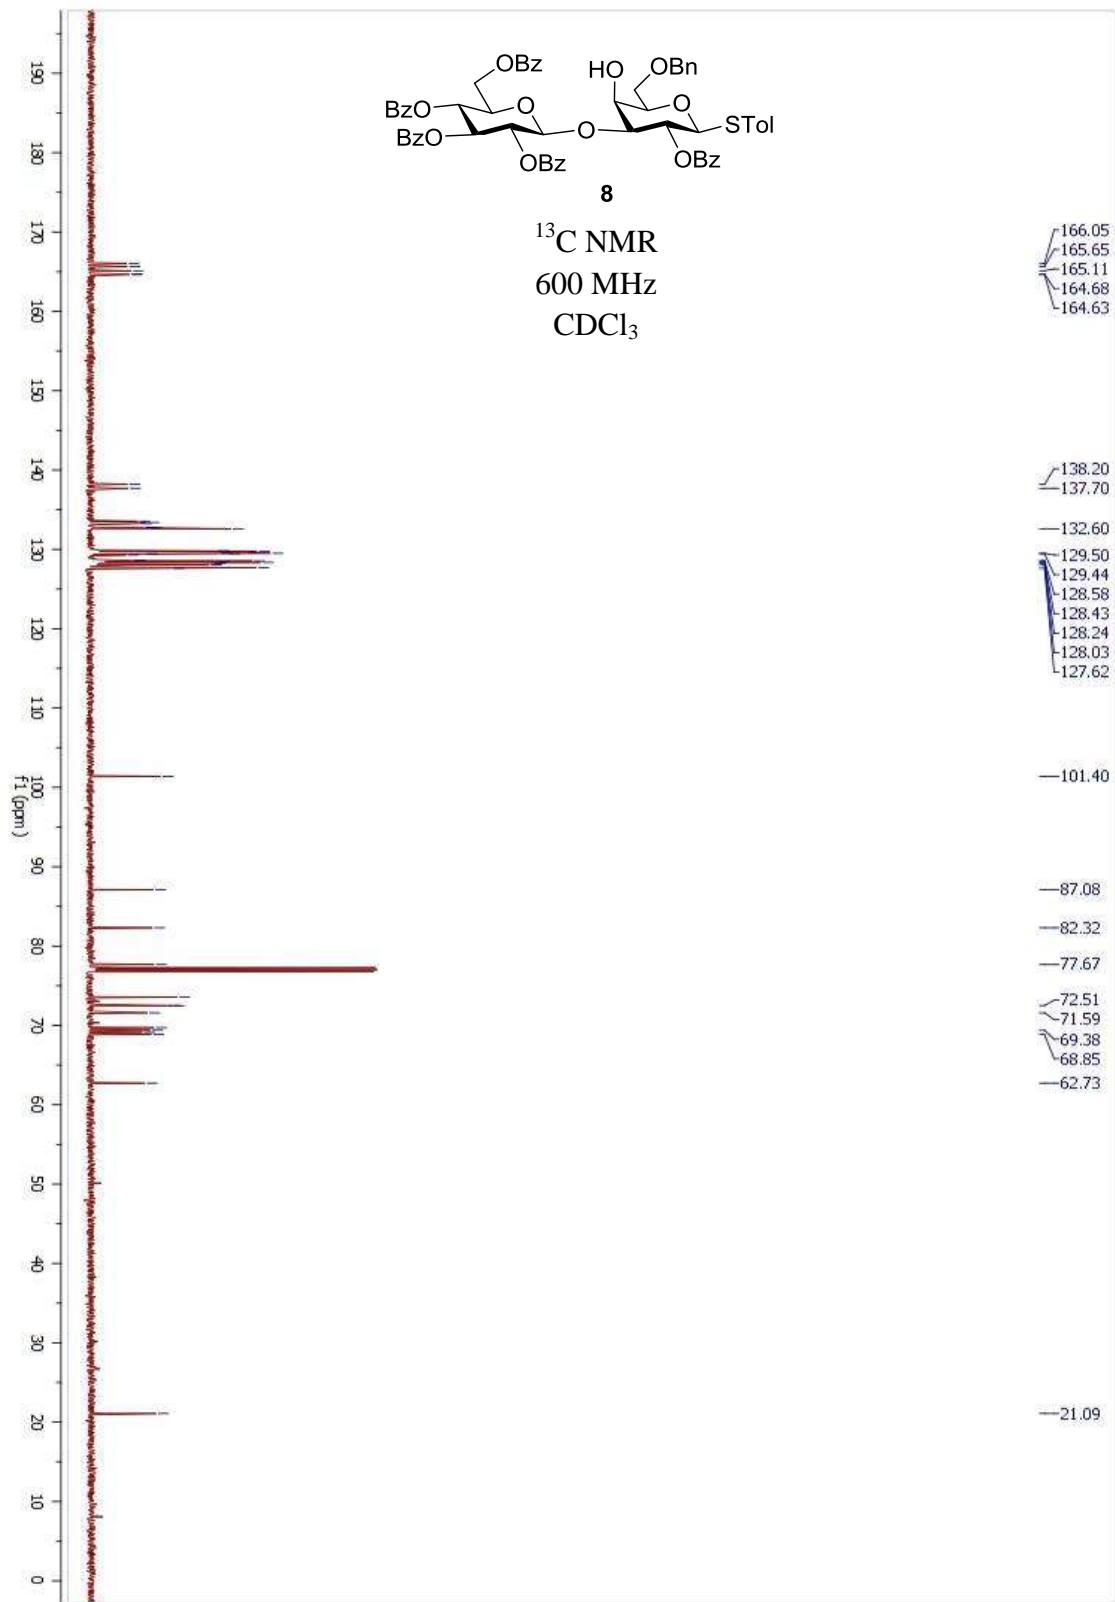



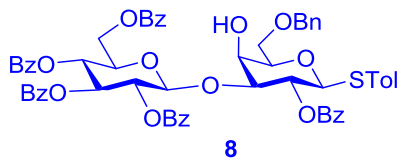

<sup>1</sup>H-<sup>1</sup>H COSY  
 600 MHz  
 CDCl<sub>3</sub>

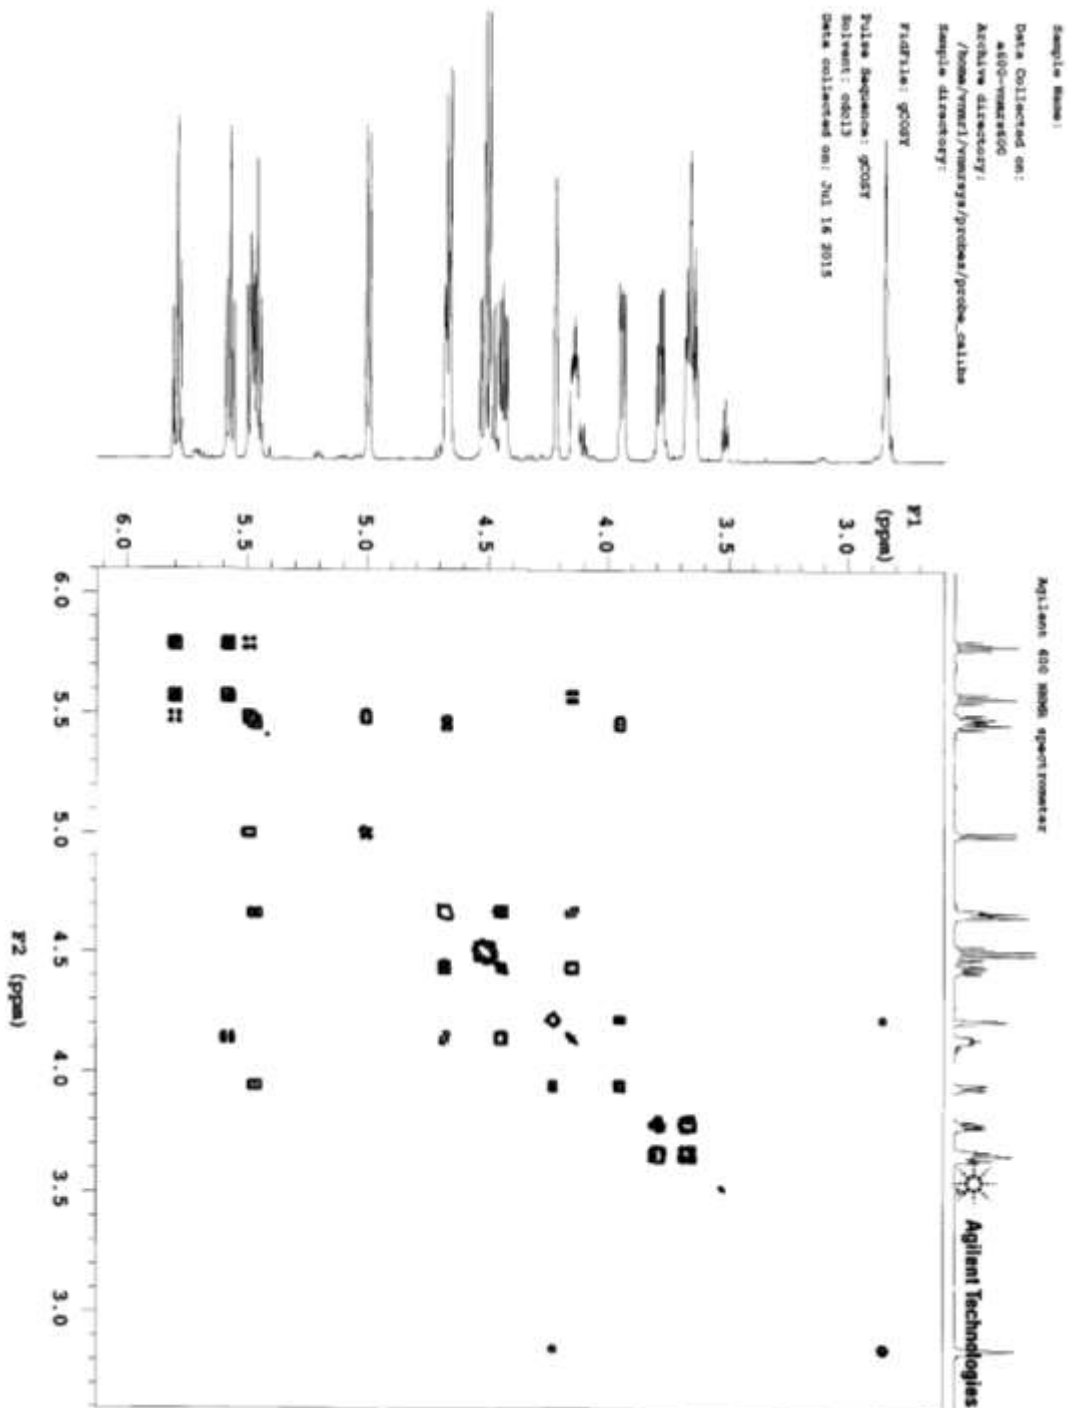

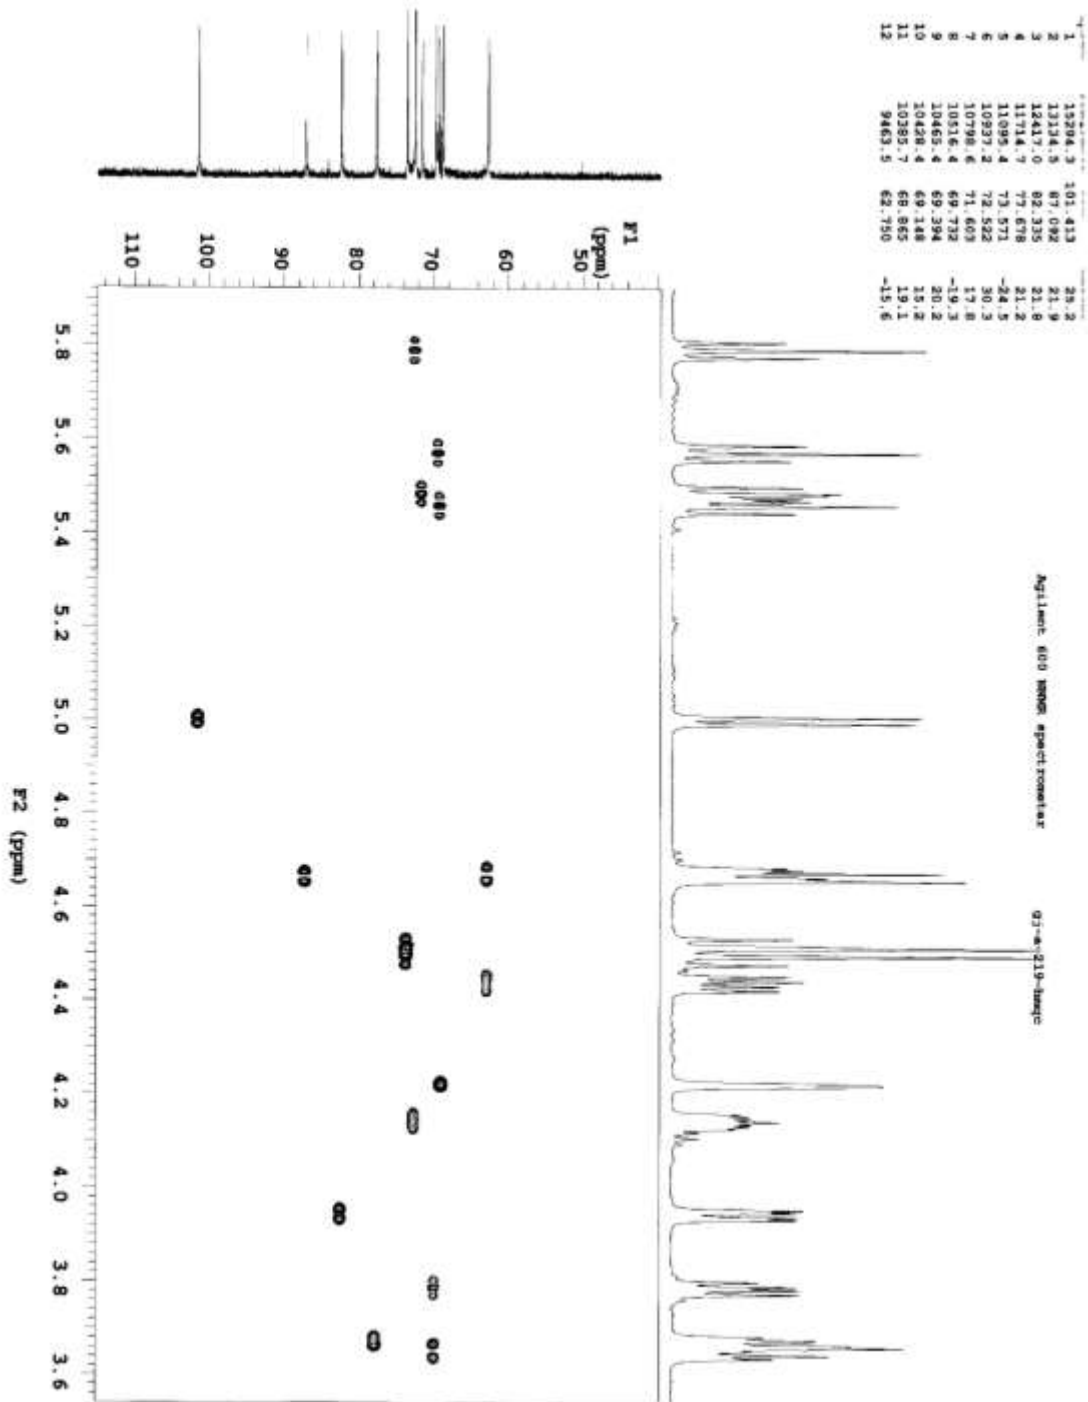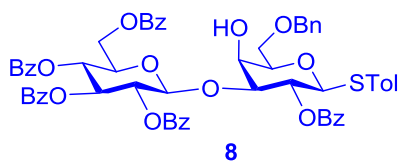

$^1\text{H}-^{13}\text{C}$  HMQC  
 600/150 MHz  
 $\text{CDCl}_3$

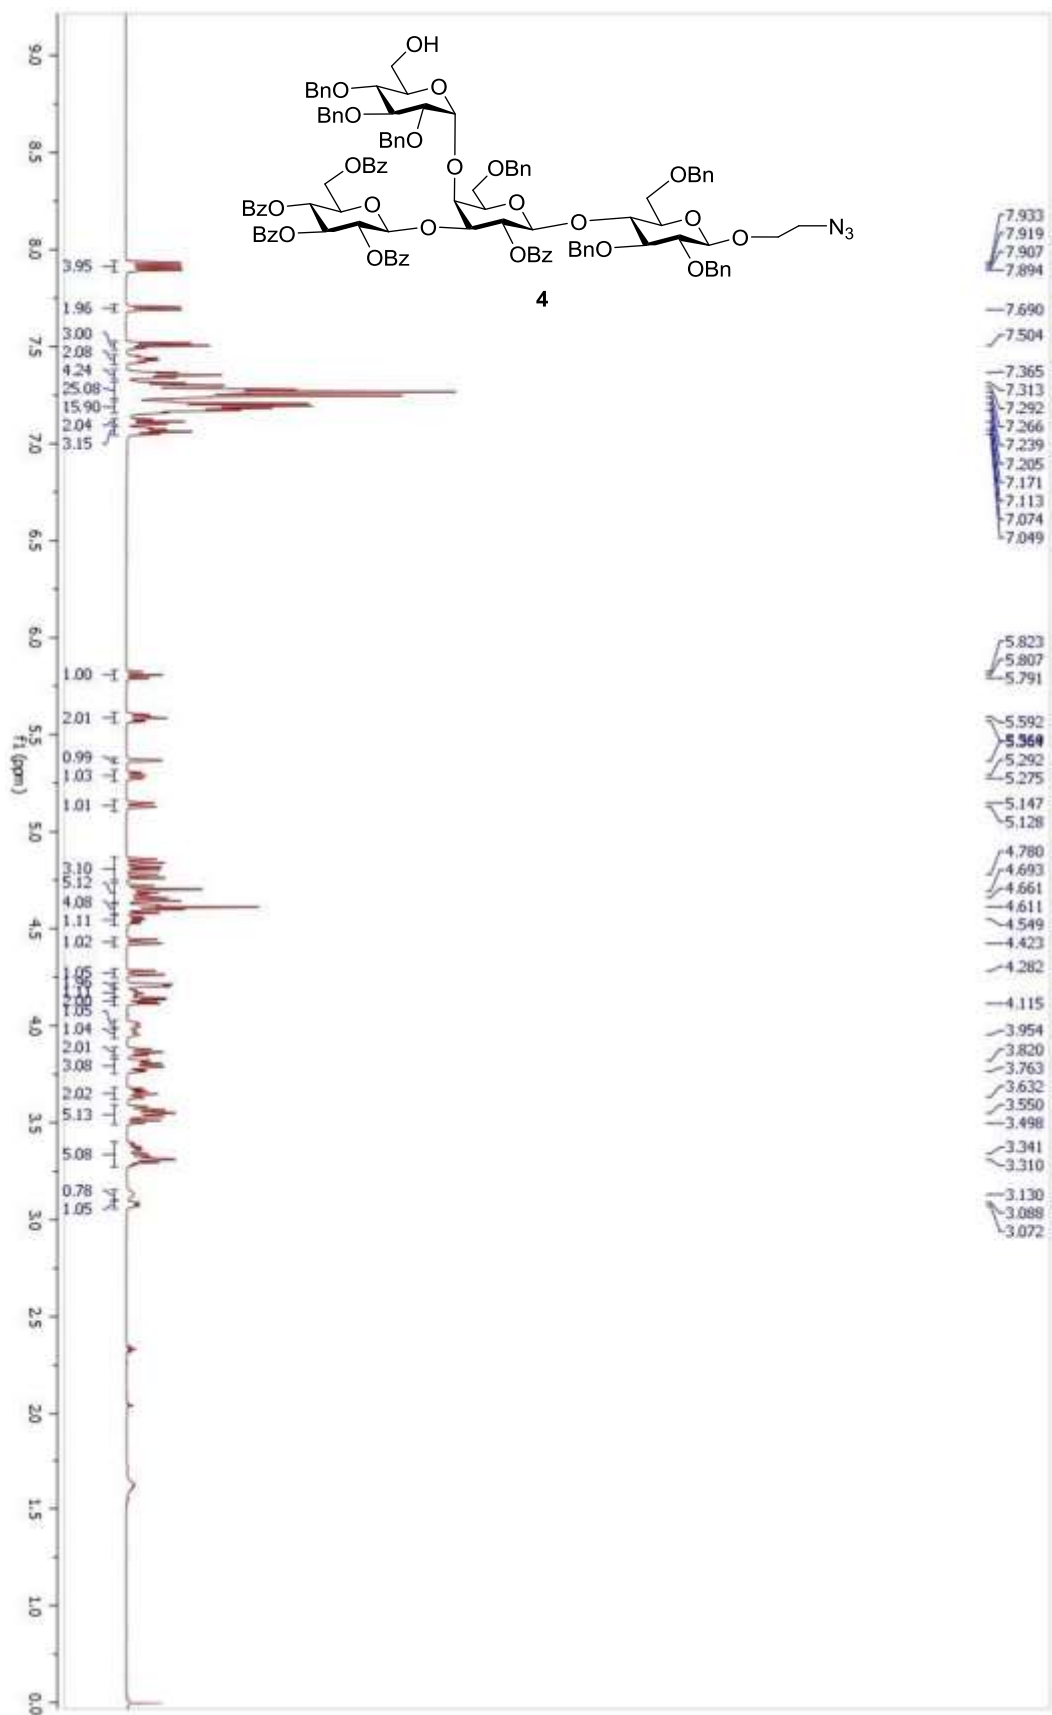



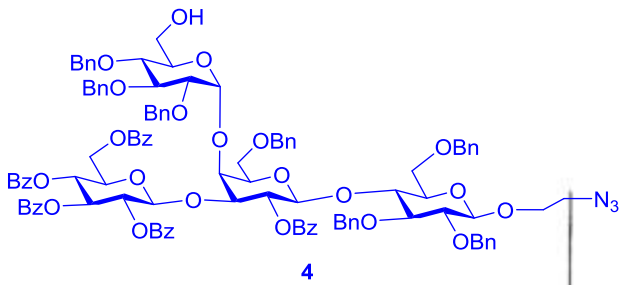

4

$^1\text{H}$ - $^1\text{H}$  COSY  
600 MHz  
 $\text{CDCl}_3$

Sample Name:  
Data collected on:  
a60-vnara600  
Archive directory:  
/home/vnara1/vnara600/probes/probe\_calls  
Sample directory:  
Fidfile: gcosy  
Pulse sequence: gcosy  
Solvent: cdcl3  
Data collected on: Nov 12 2015

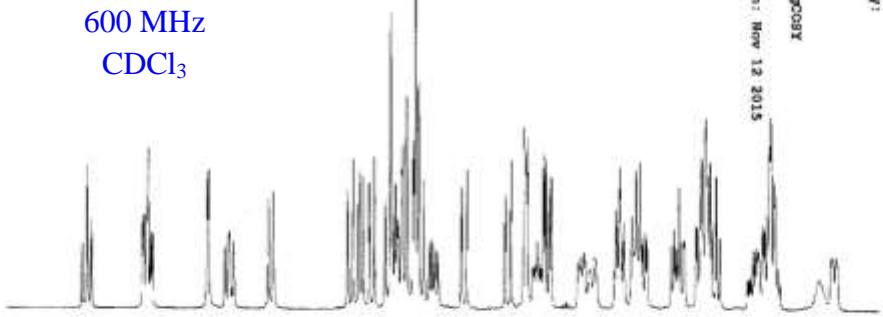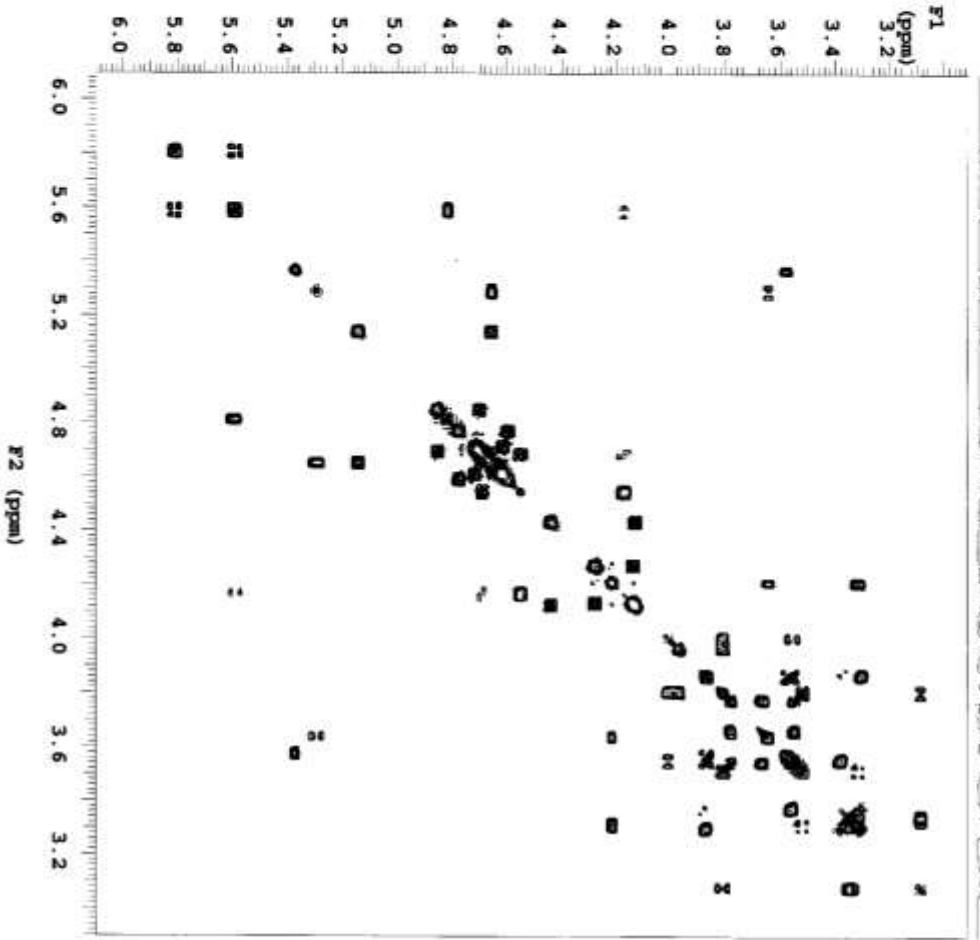

Agilent 600 MHz spectrometer

Agilent Technologies

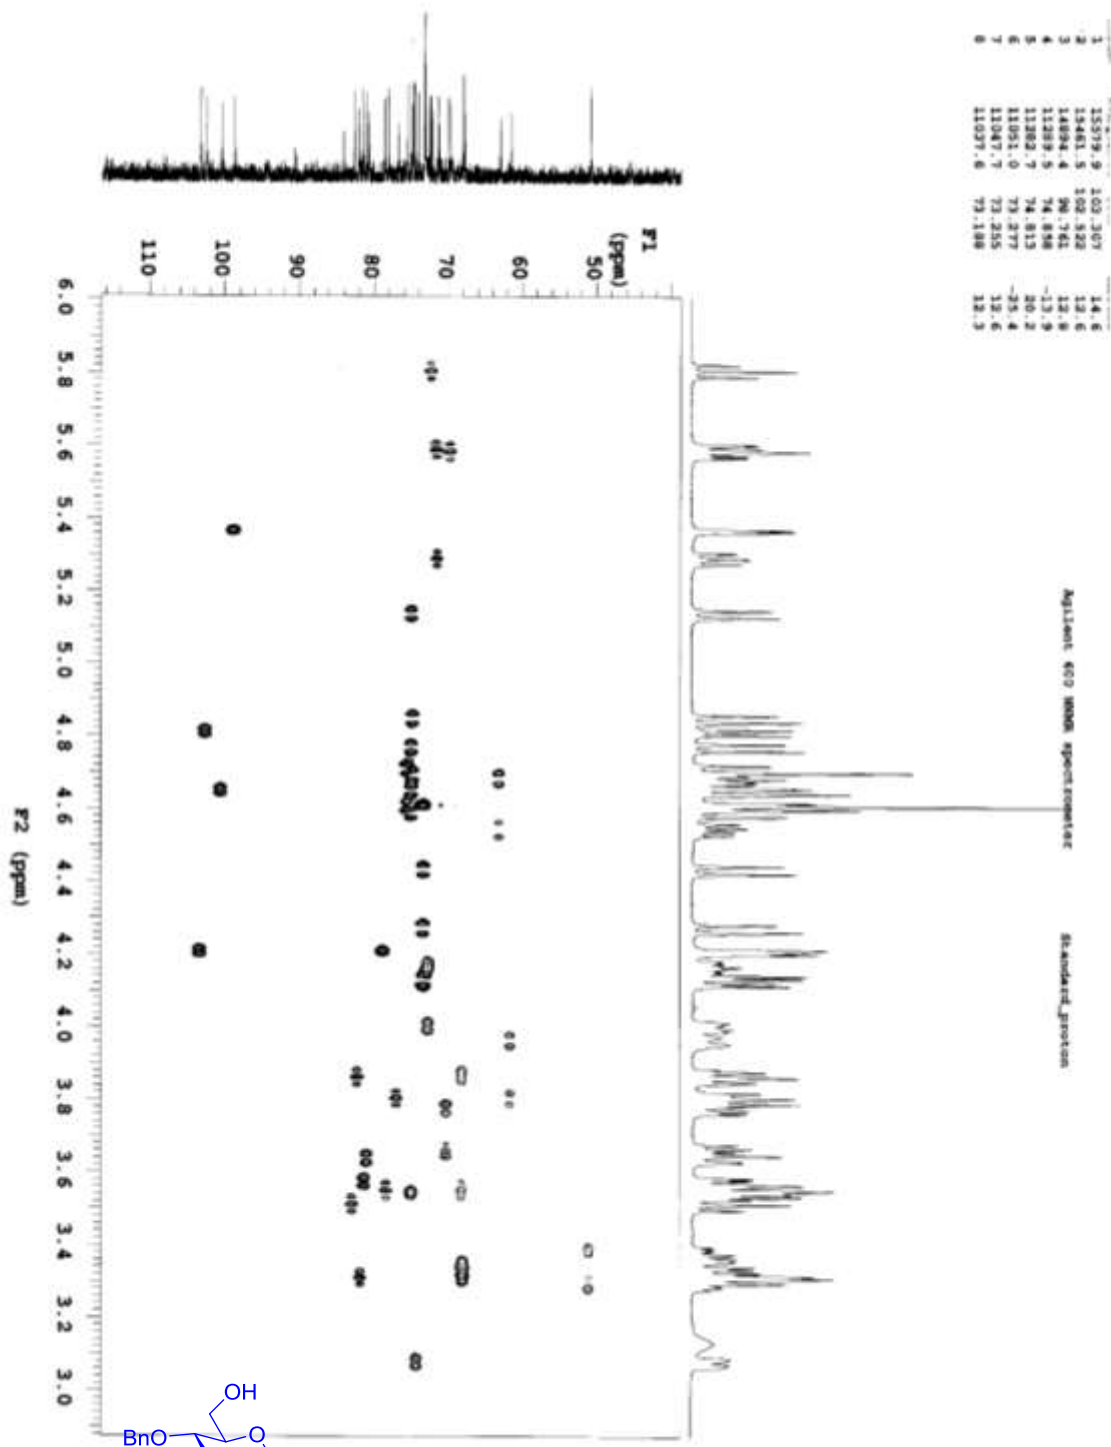

|   |         |         |       |
|---|---------|---------|-------|
| 1 | 15379.9 | 100.307 | 14.6  |
| 2 | 15461.5 | 102.522 | 12.6  |
| 3 | 14694.4 | 96.741  | 12.8  |
| 4 | 11289.5 | 74.838  | -12.9 |
| 5 | 11282.7 | 74.813  | 20.2  |
| 6 | 11051.0 | 73.277  | -25.4 |
| 7 | 11047.7 | 73.255  | 12.6  |
| 8 | 11037.6 | 73.188  | 12.5  |

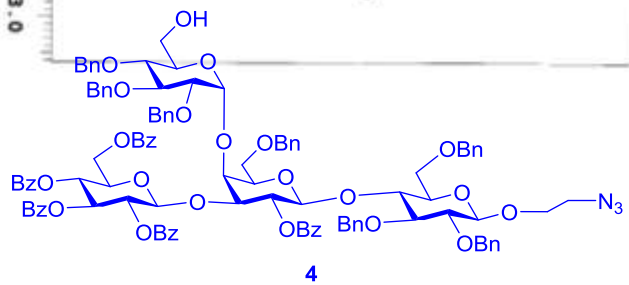

<sup>1</sup>H-<sup>13</sup>C HMQC  
600/150 MHz  
CDCl<sub>3</sub>



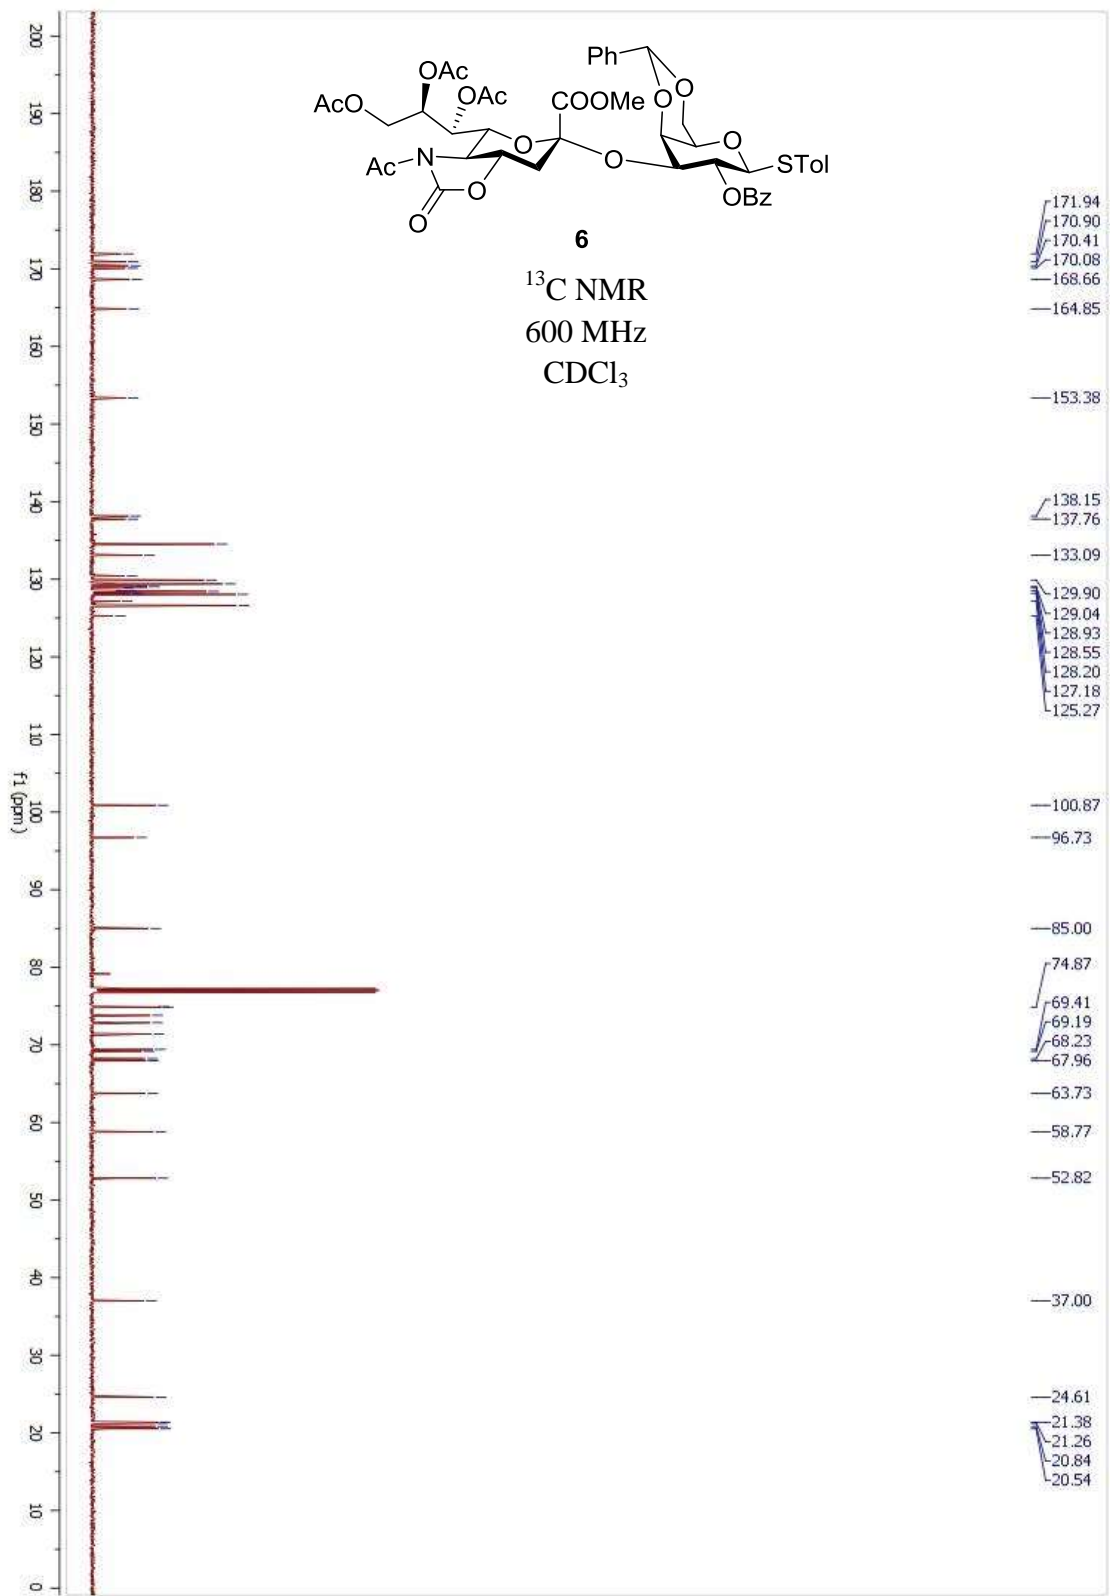



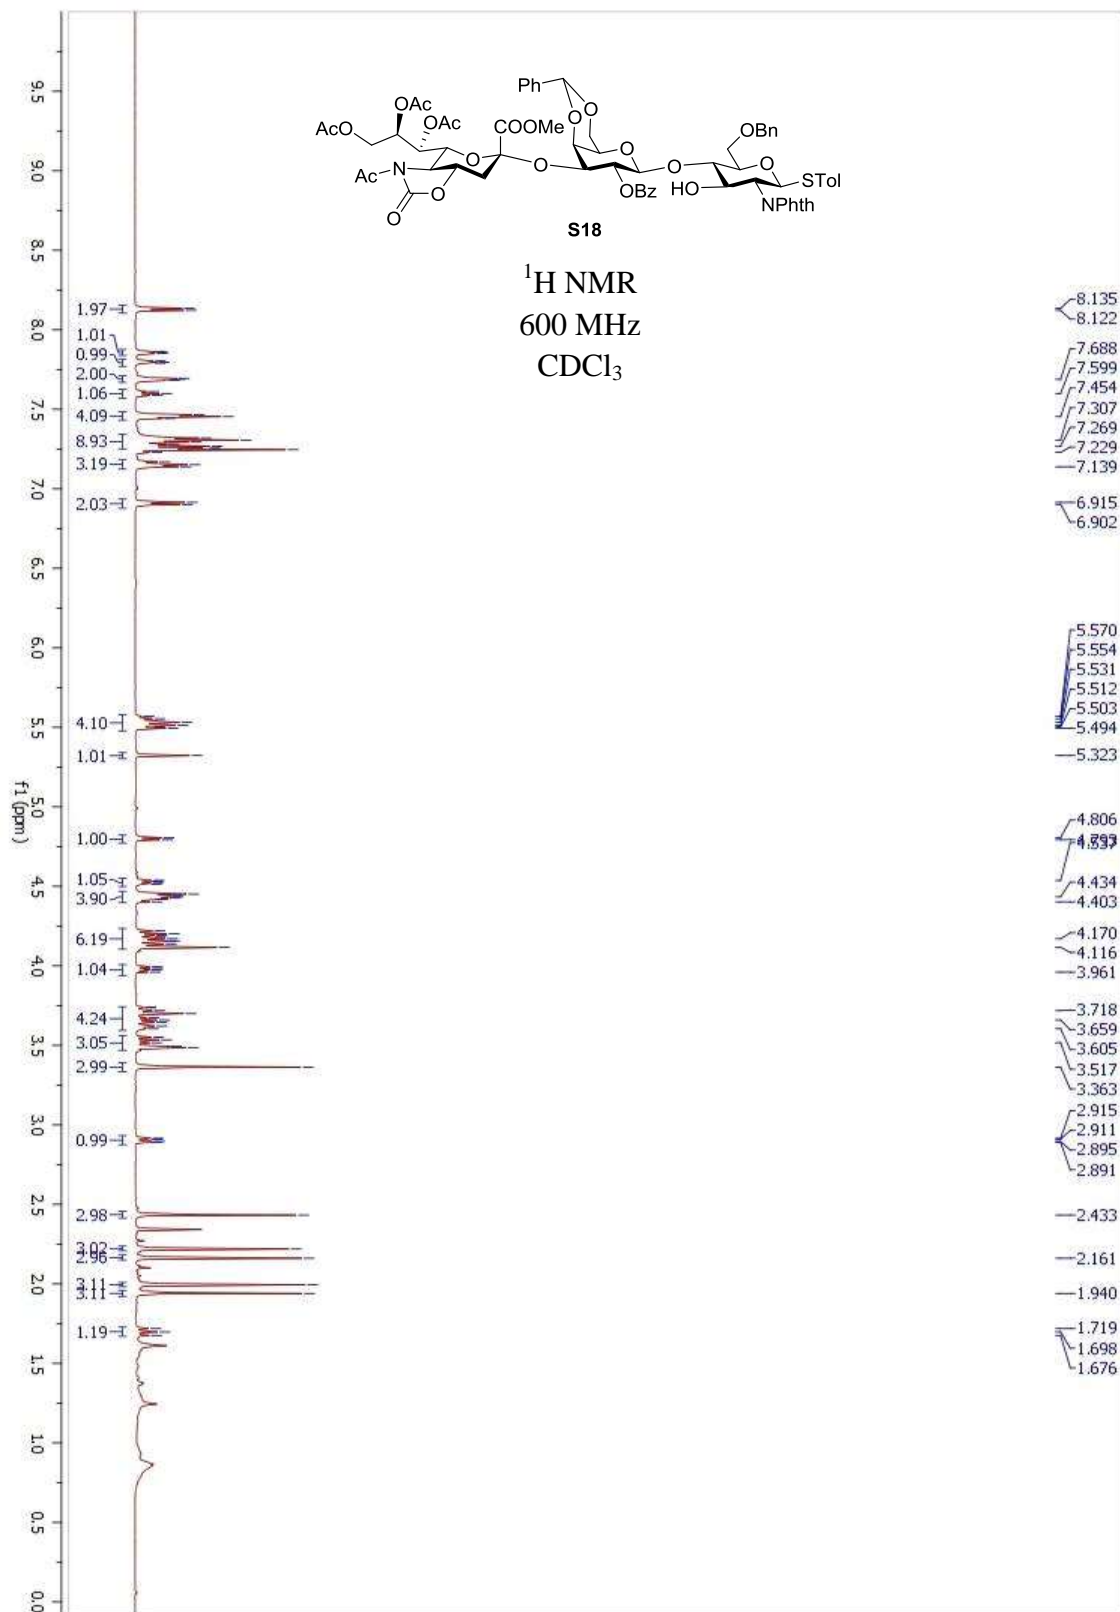



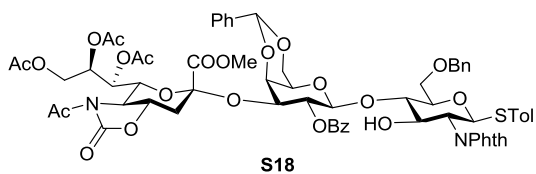

$^1\text{H}$ - $^1\text{H}$  COSY  
600 MHz  
 $\text{CDCl}_3$

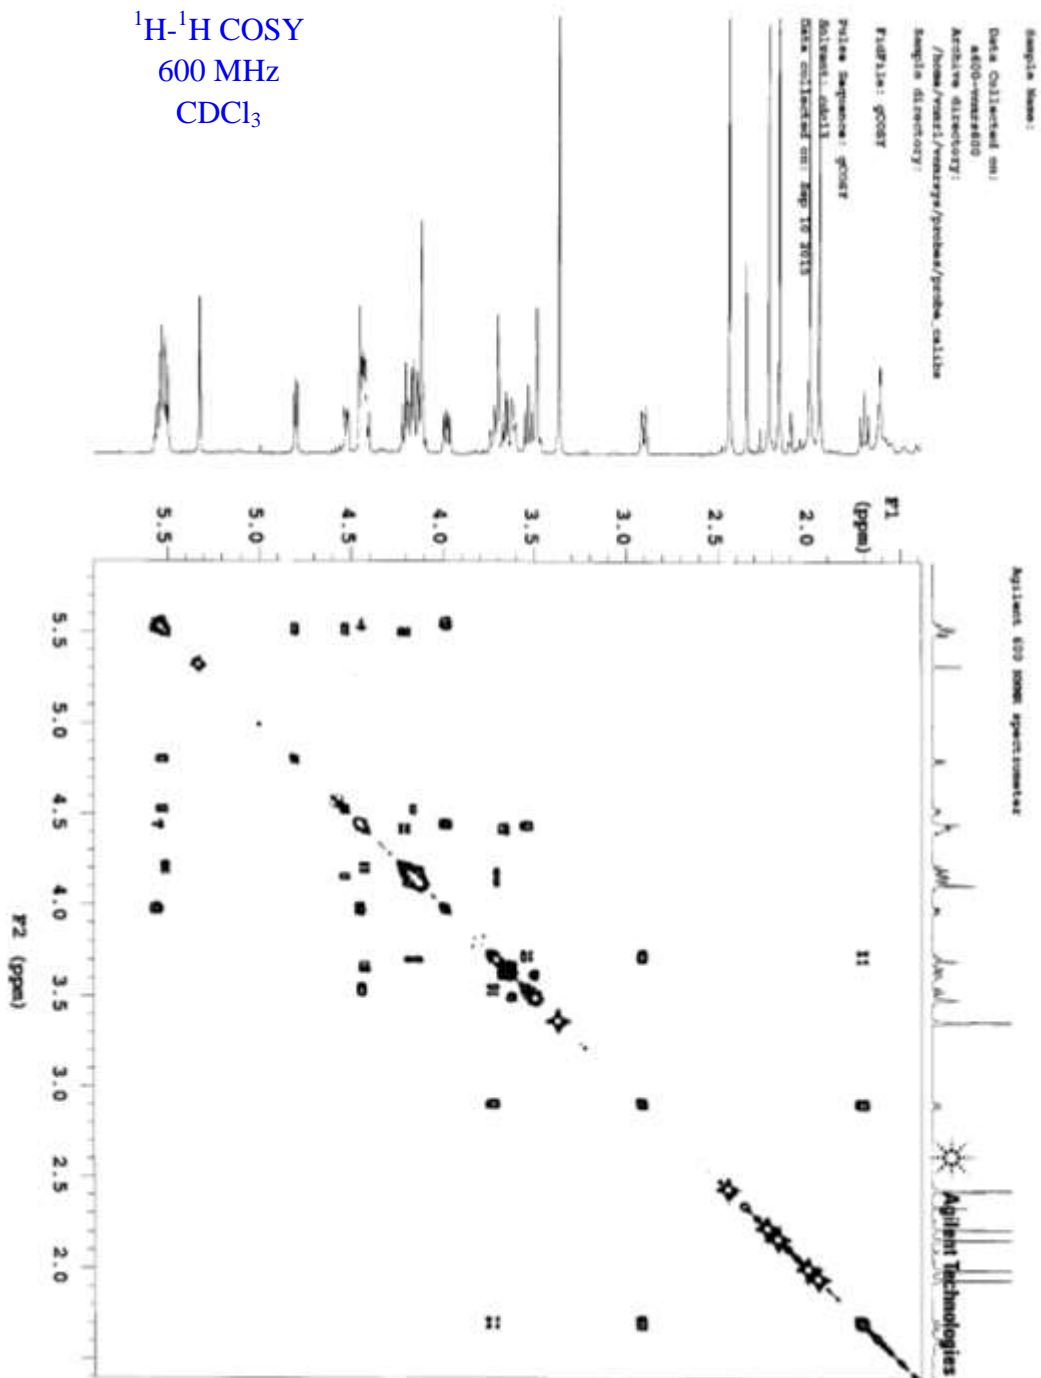





|   |         |         |      |
|---|---------|---------|------|
| 1 | 14512.5 | 101.532 | 35.0 |
| 2 | 15169.2 | 100.584 | 32.9 |
| 3 | 14601.5 | 96.819  | 27.1 |

Agilent Technologies

Agilent 600 mmB spectrometer

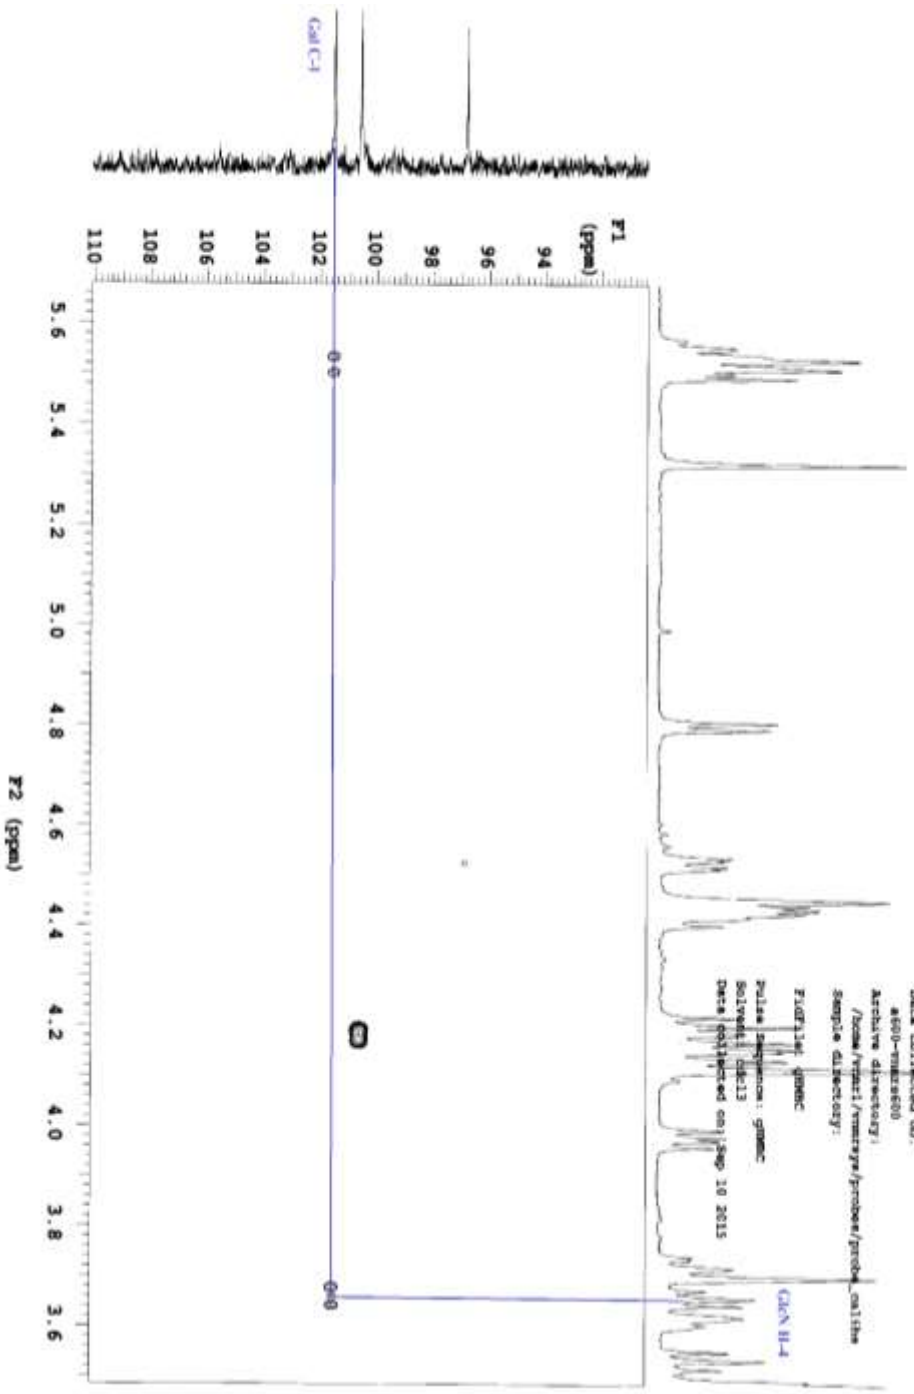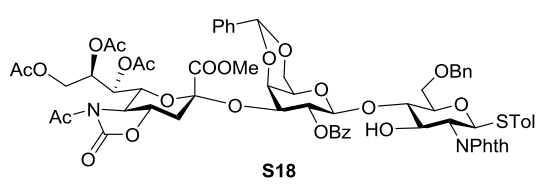

<sup>1</sup>H-<sup>13</sup>C HMBC  
150/600 MHz  
CDCl<sub>3</sub>

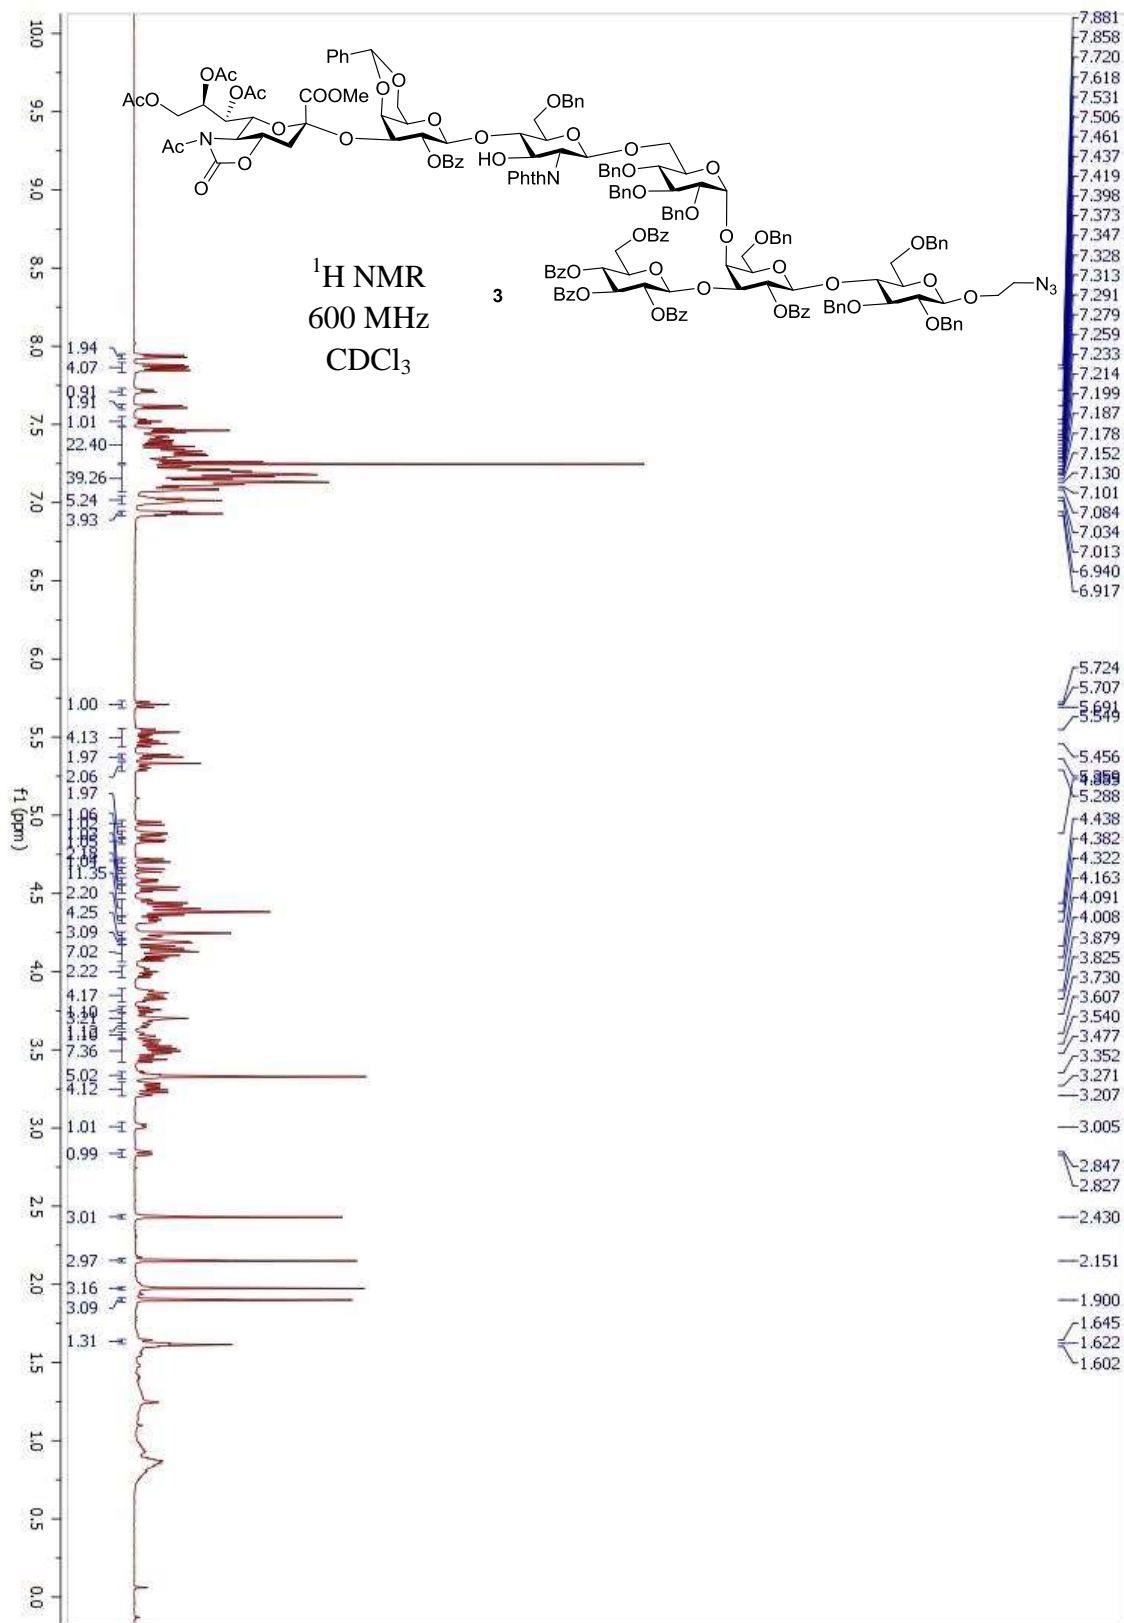





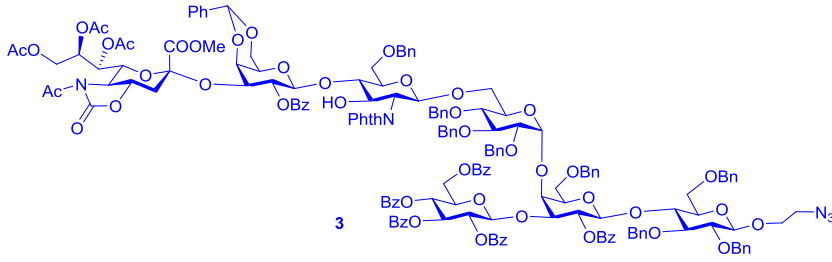

$^1\text{H}$ - $^1\text{H}$  COSY  
600 MHz  
 $\text{CDCl}_3$

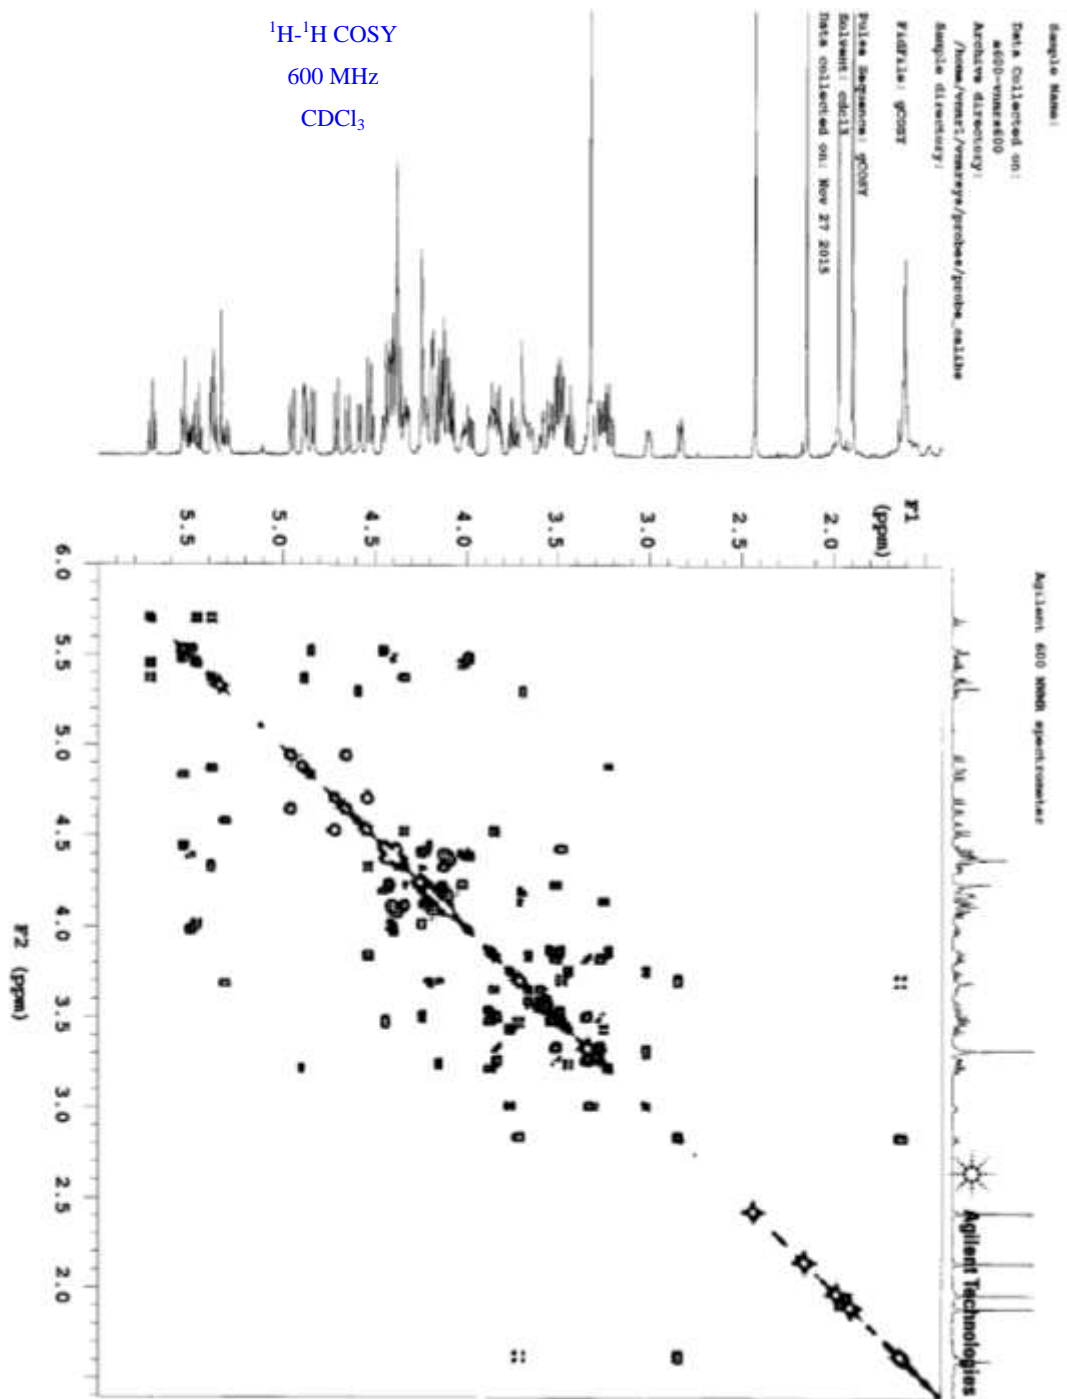

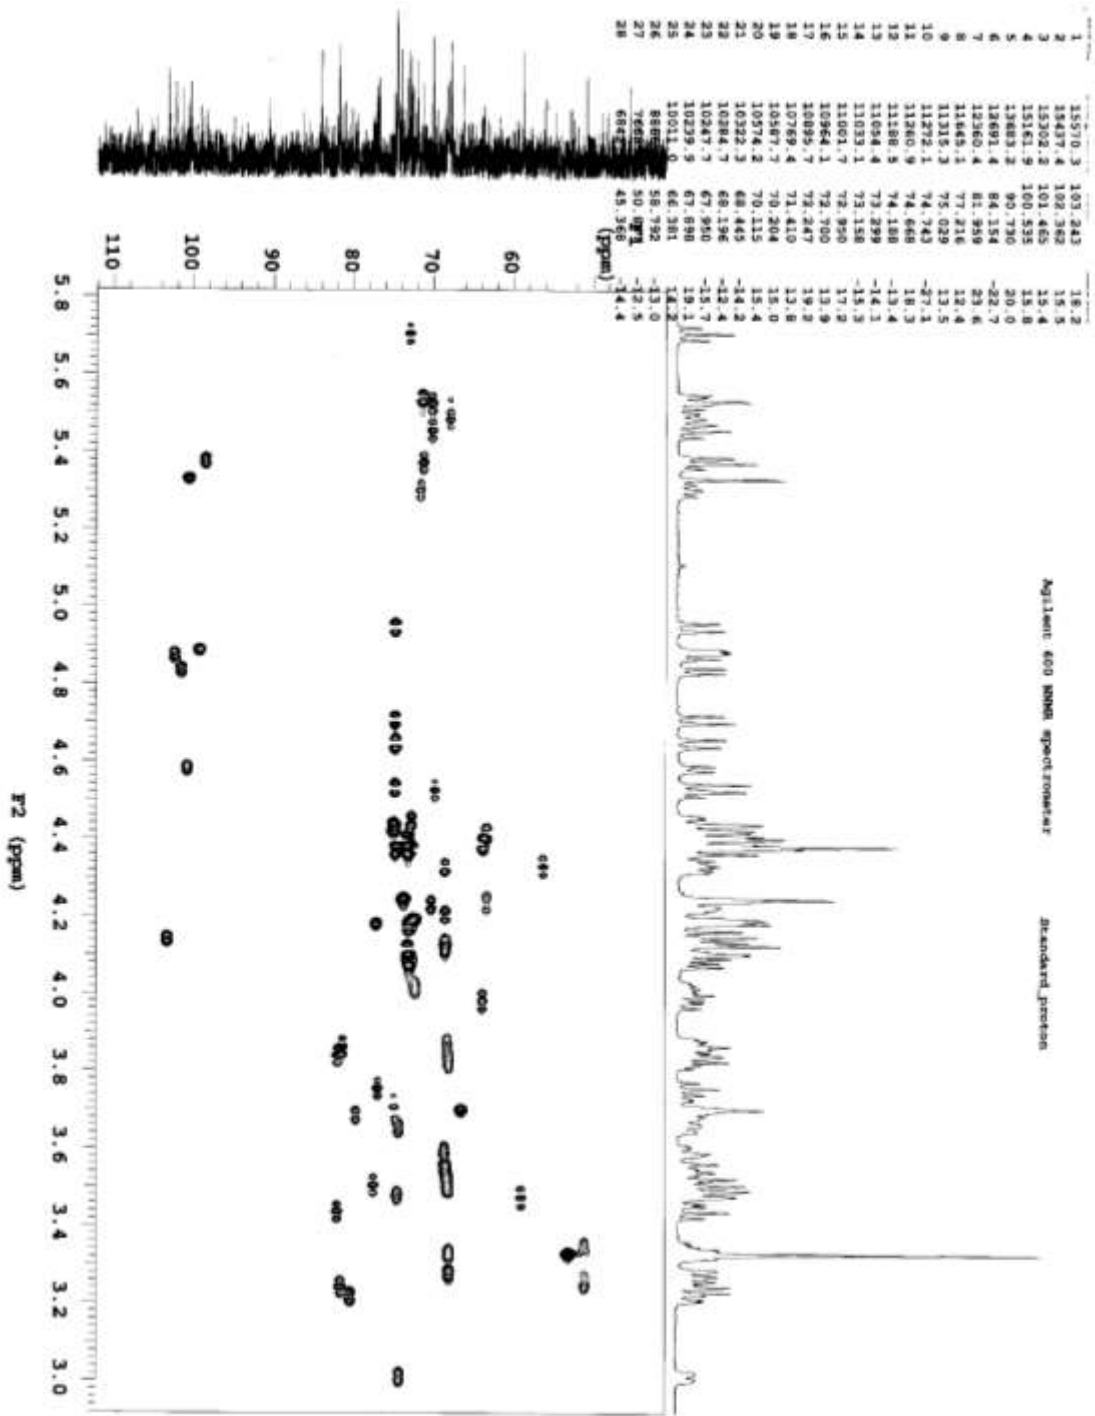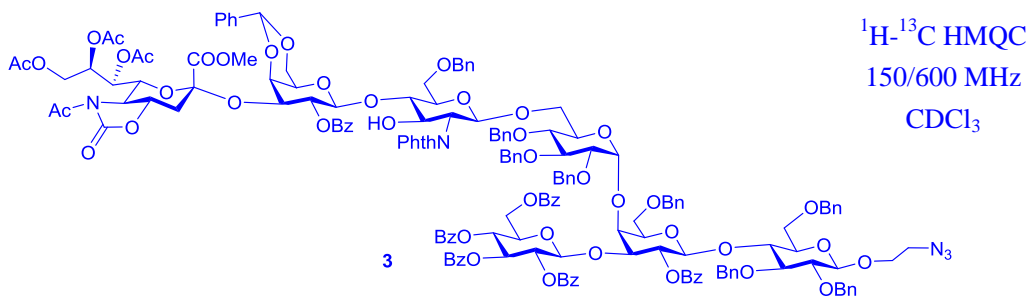

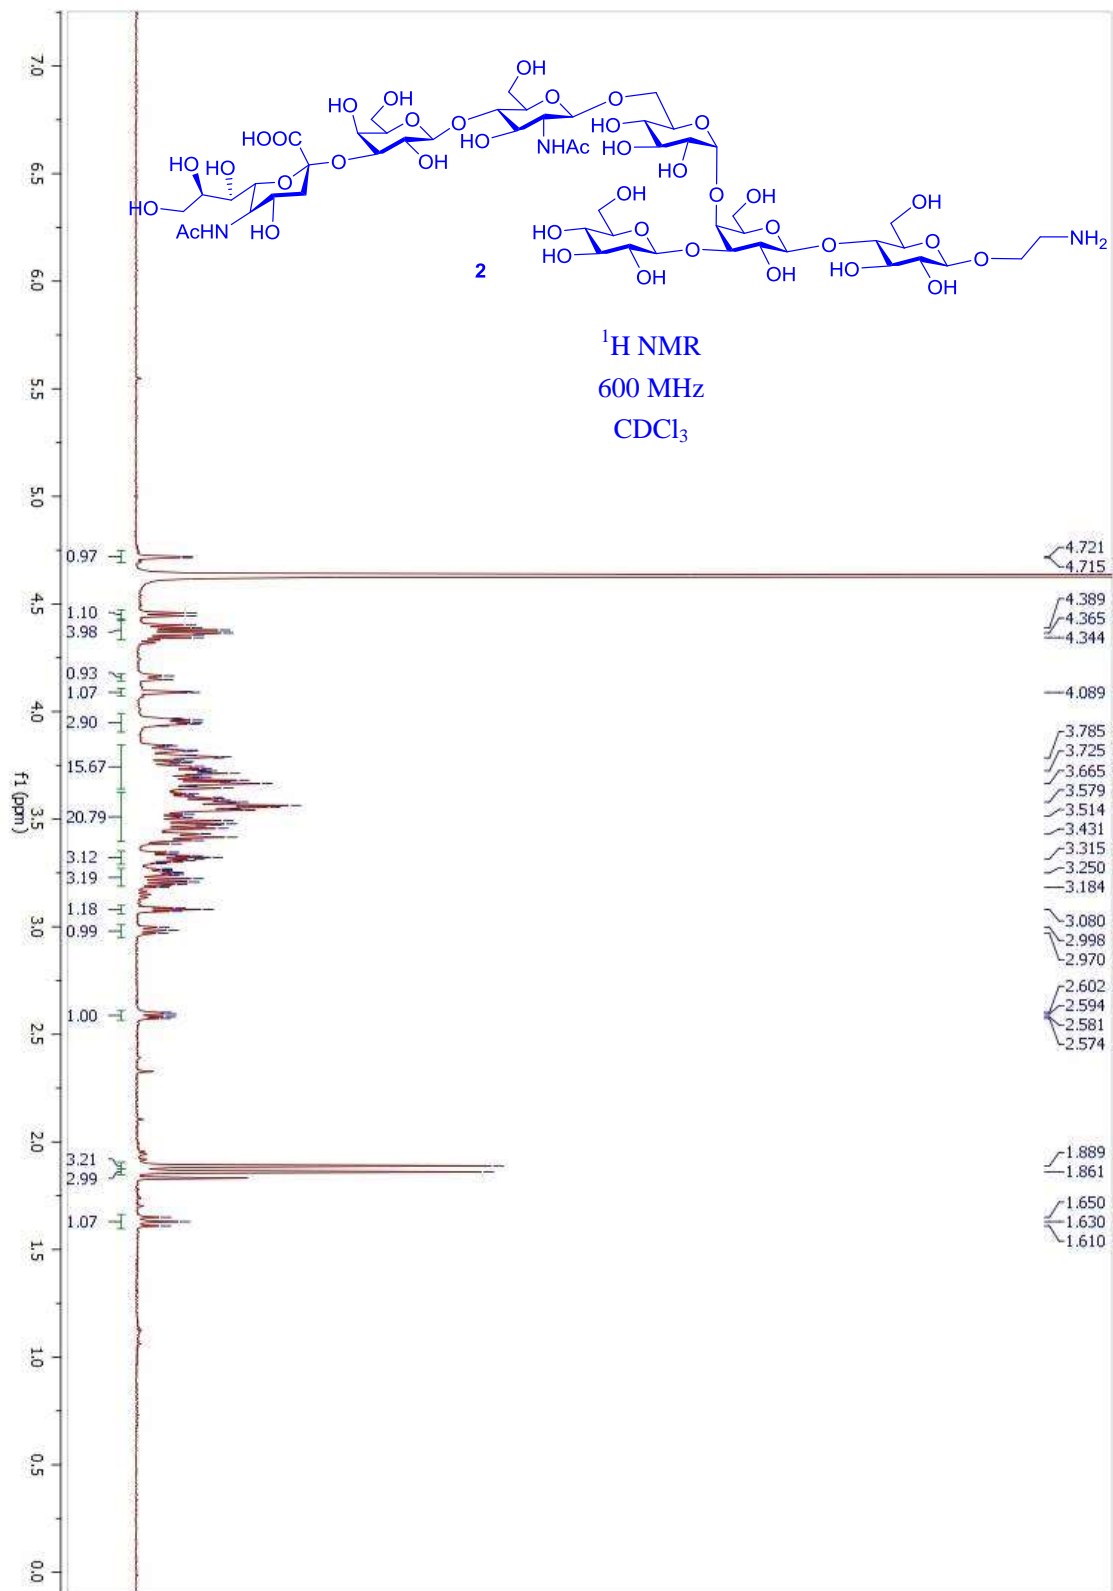

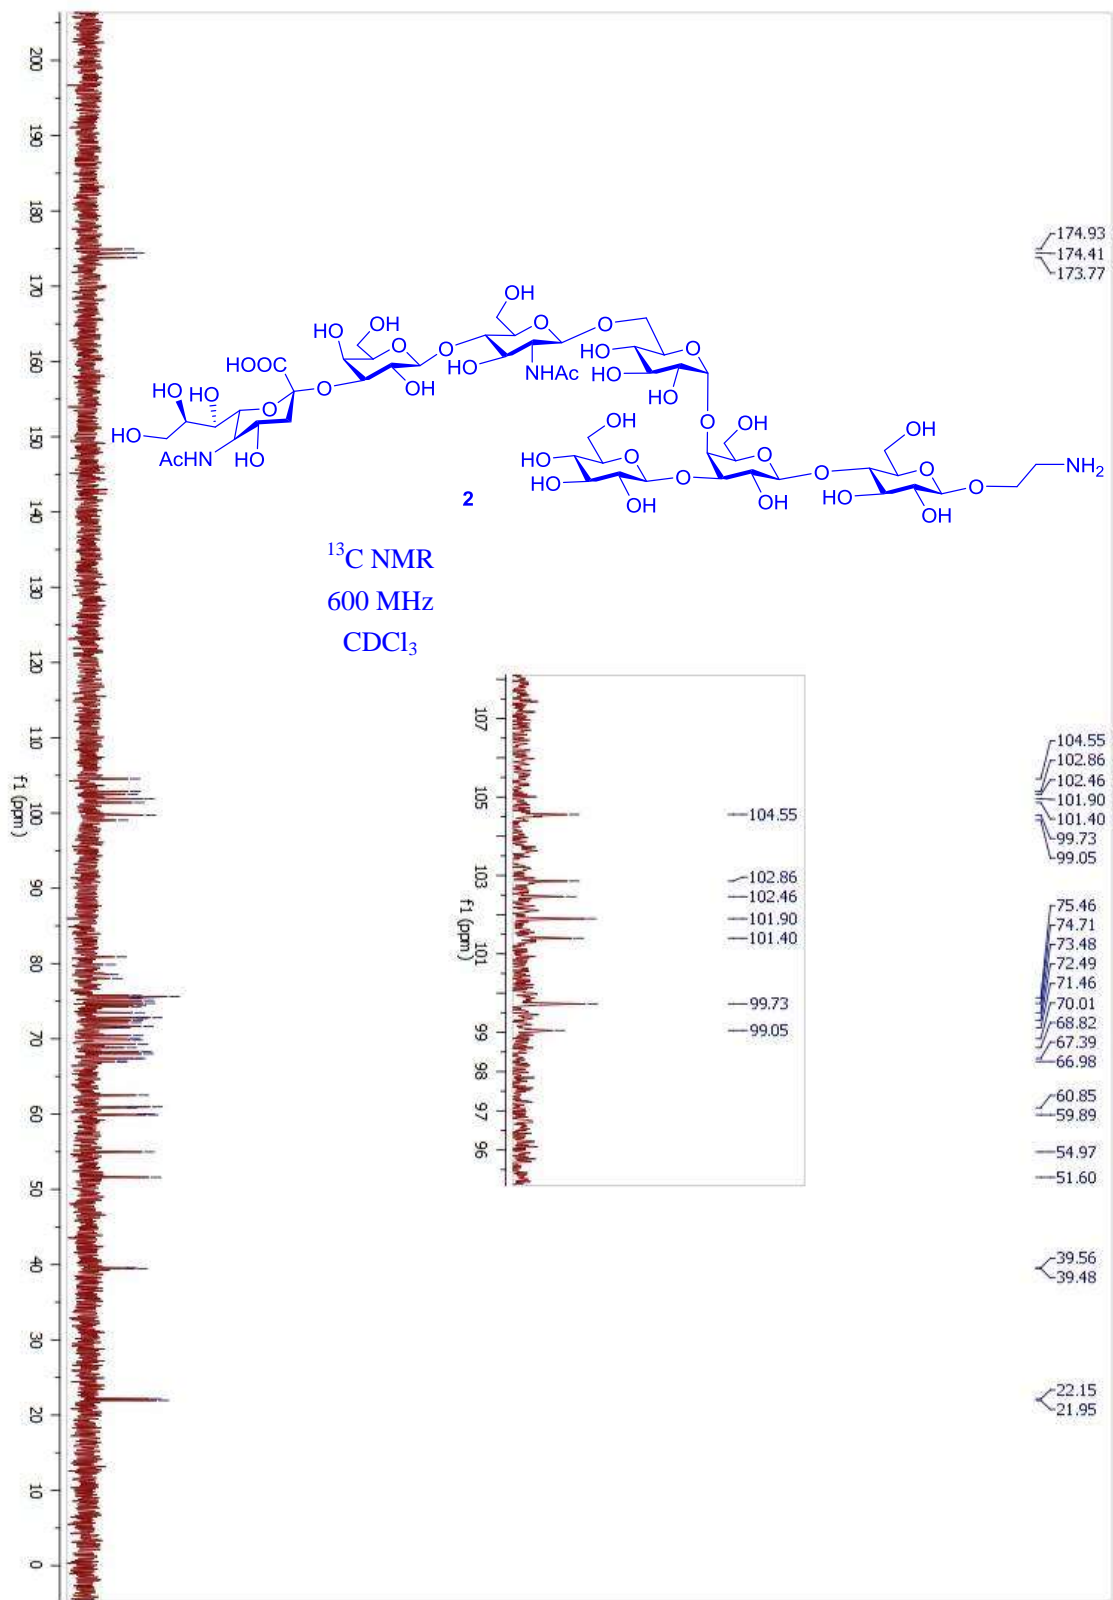

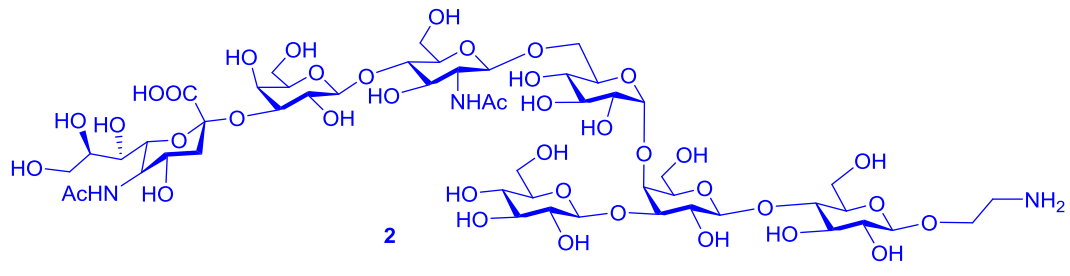

$^1\text{H}$ - $^1\text{H}$  COSY

700 MHz

$\text{CDCl}_3$

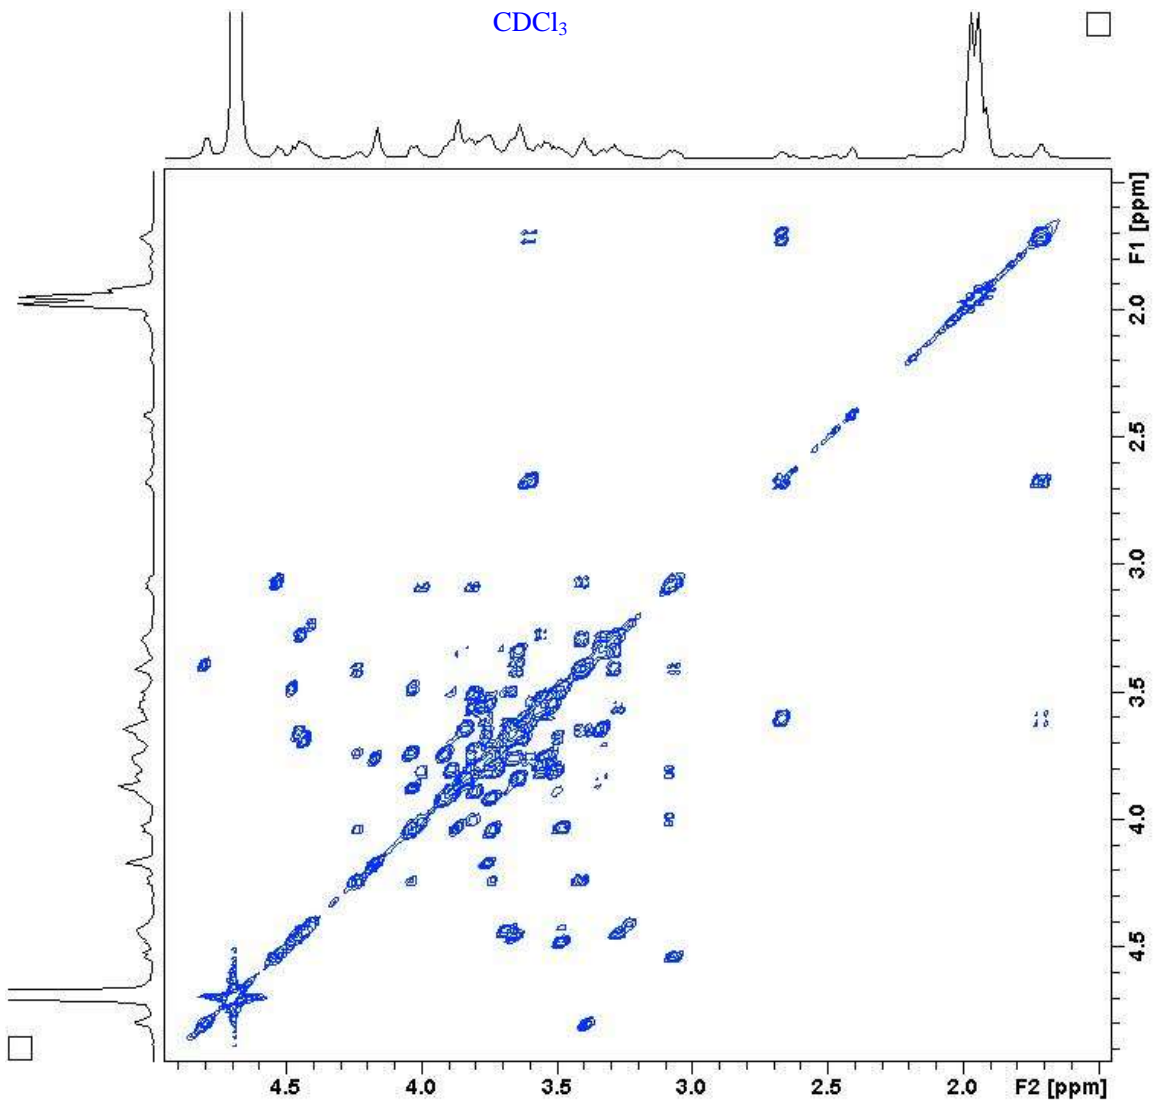

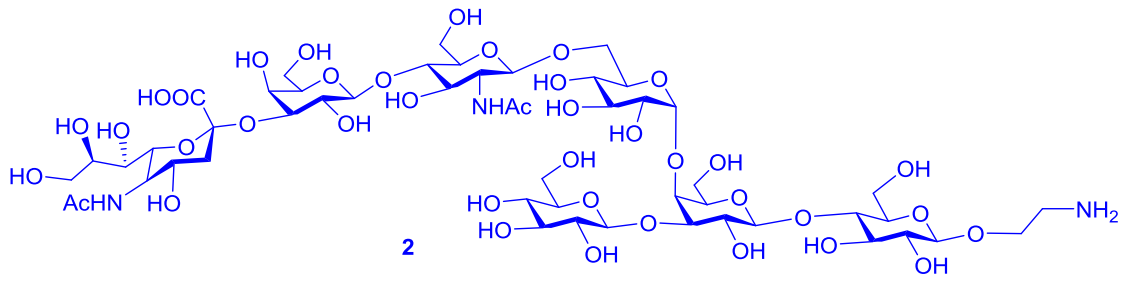

$^1\text{H}$ - $^{13}\text{C}$  HMQC  
 175/700 MHz  
 $\text{CDCl}_3$

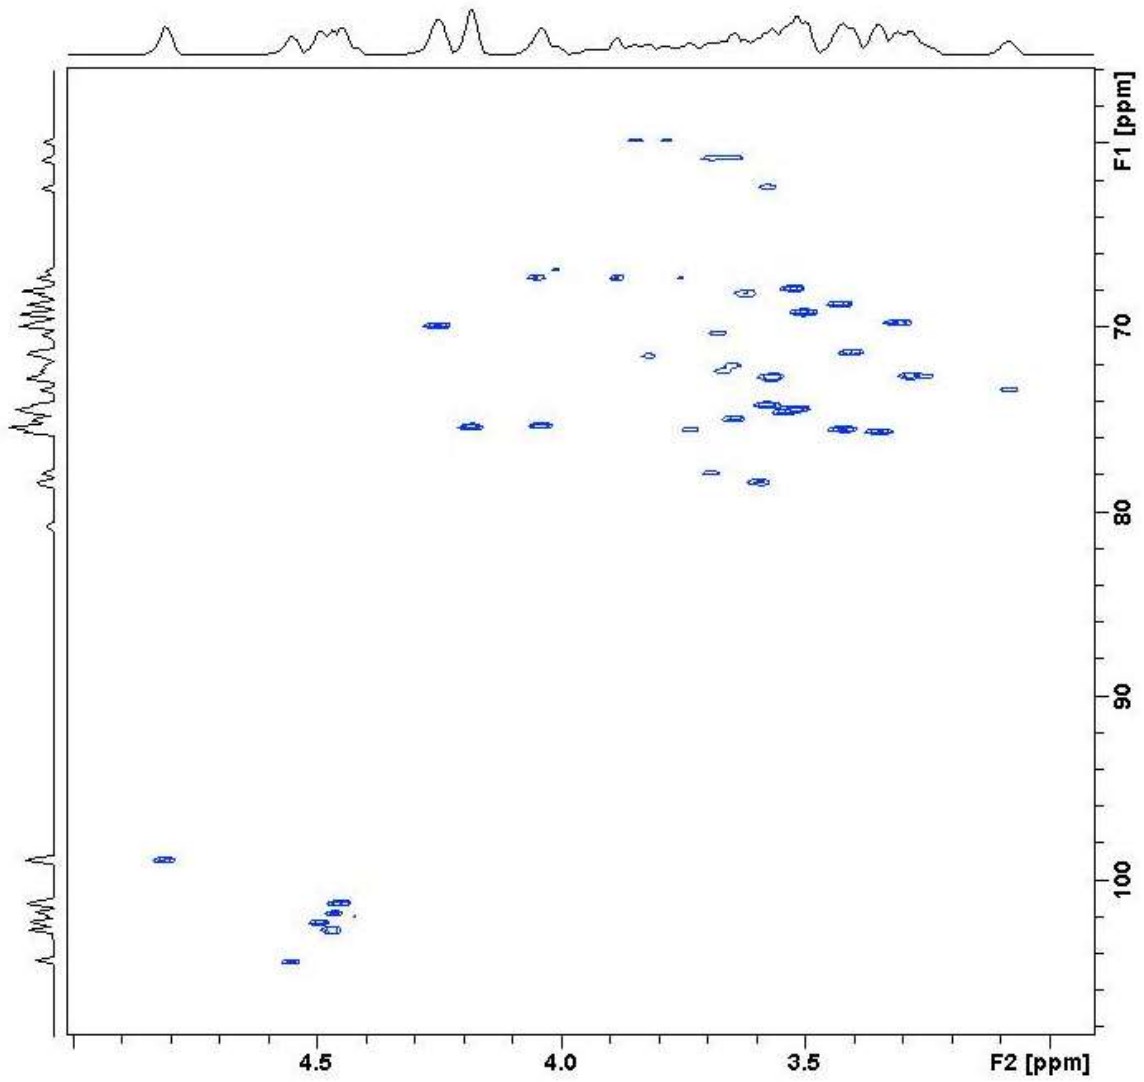

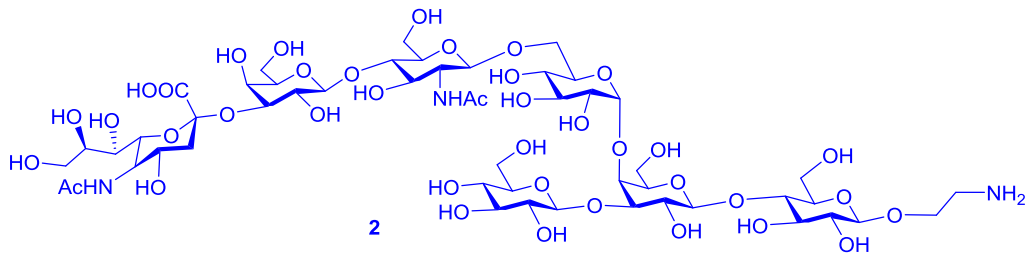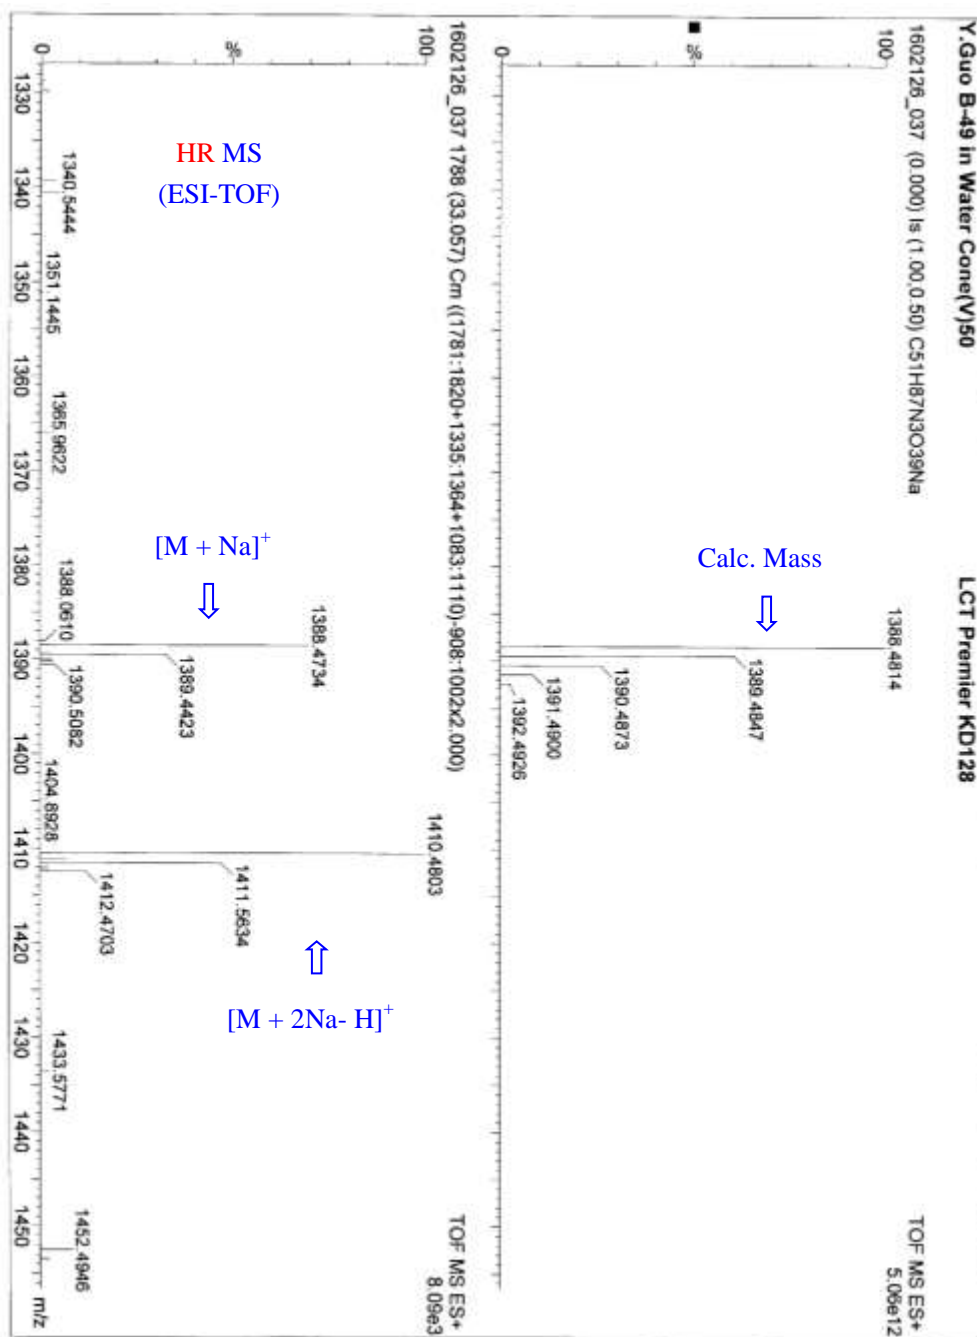

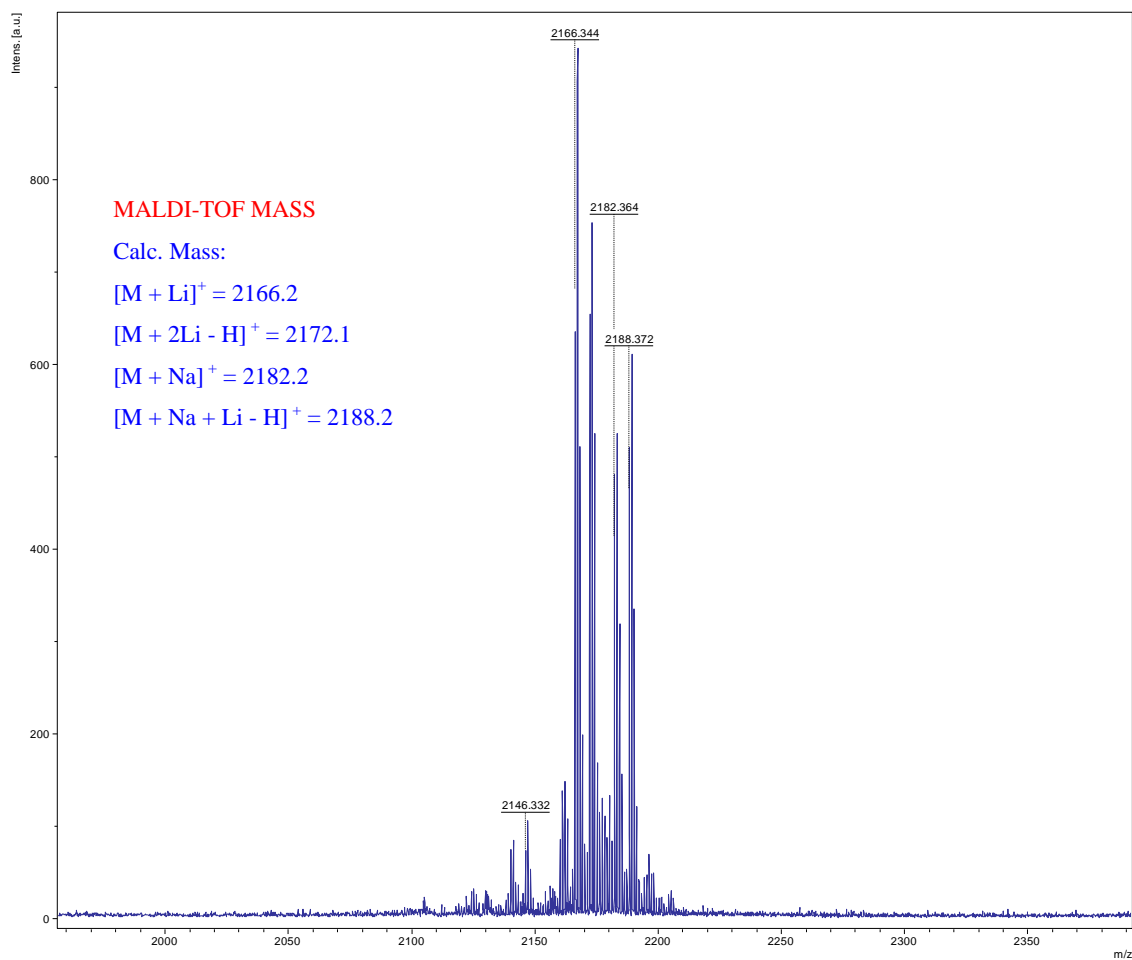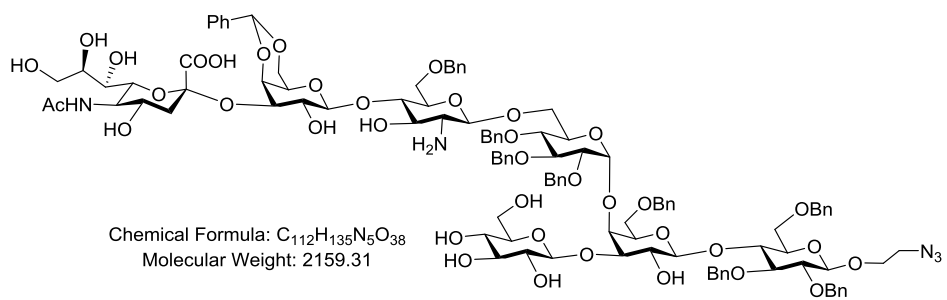

Reaction intermediate after deacylation (the 2<sup>nd</sup> deprotectin step)



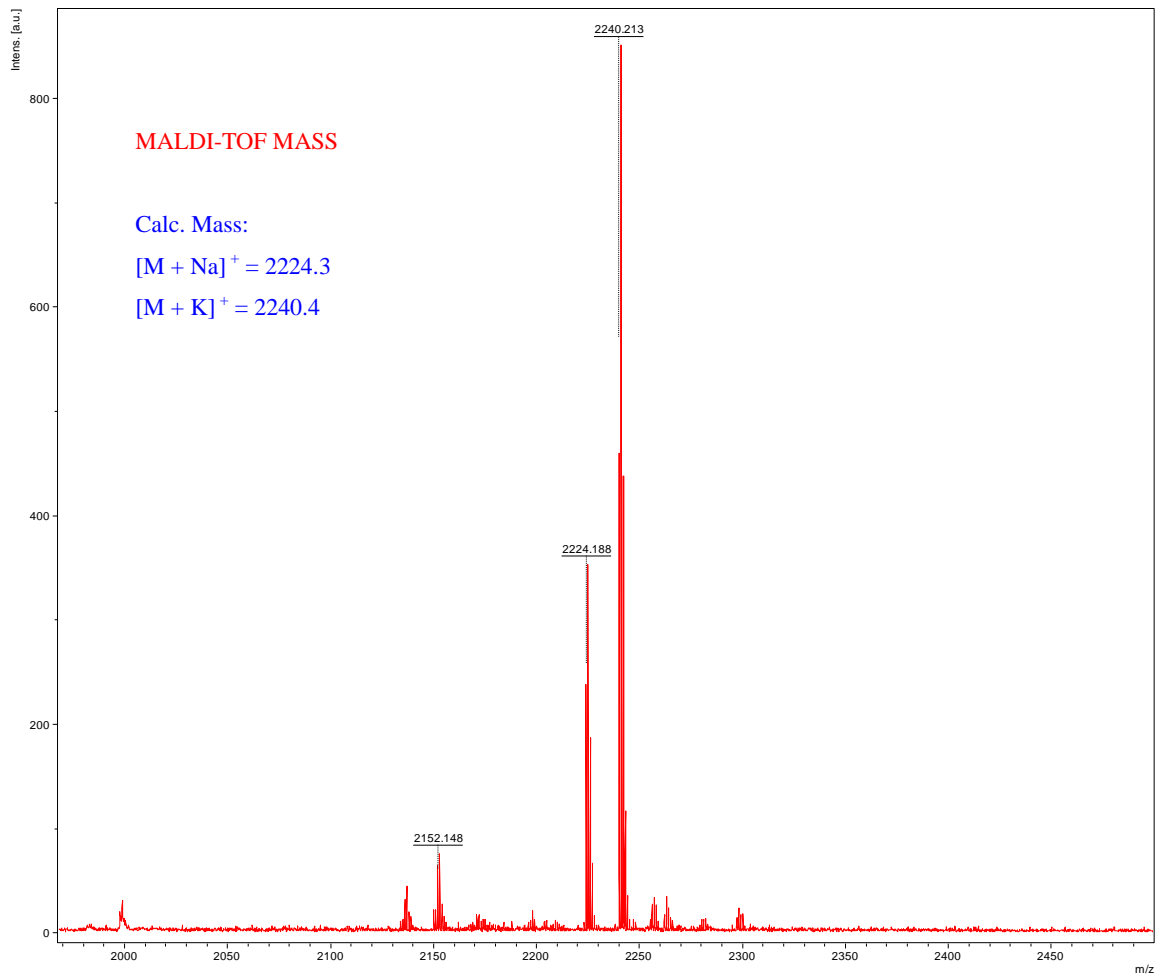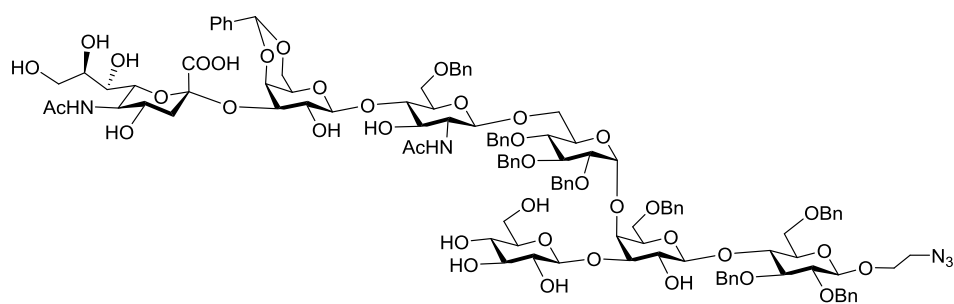

Chemical Formula:  $C_{114}H_{137}N_5O_{39}$   
Molecular Weight: 2201.3460

Reaction intermediate after selective *N*-acetylation (the 4<sup>th</sup> deprotectin step)
